# Supplementary material
Source: PubMed Central journal article supplement (PMC4685779)
Supplement: rspb20152189supp1.pdf [file rspb20152189supp1.pdf]

## Supplementary Materials for

### **On the origin of mongrels: Evolutionary history of free-breeding dogs in Eurasia**

Małgorzata Pilot, Tadeusz Malewski, Andre E. Moura, Tomasz Grzybowski, Kamil Oleński,  
Anna Ruść, Stanisław Kamiński, Fernanda Fadel, Daniel Mills, Abdulaziz N. Alagaili, Osama  
B. Mohammed, Grzegorz Kłys, Innokentiy M. Okhlopkov, Ewa Suchecka & Wiesław  
Bogdanowicz

This file includes:

- Supplementary Text
- Supplementary Figures 1-20
- Supplementary Tables 1-5

## **Screening the dataset for related individuals**

We used the software KINGROUP2 (Konovalov *et al.* 2004) to identify groups of kin (e.g. full-siblings and half-siblings) and CERVUS 3.0 (Marshall *et al.* 1998) to identify parent-offspring pairs. These analyses were carried out independently for two datasets consisting of the same individuals, but differing in the set of loci used. The number of loci for this analysis had to be reduced to less than 1,000 due to the limits set for KINGROUP input files. The first dataset was constructed by selecting highly variable loci (having minor allele frequencies between 0.496 and 0.500) without missing data, which resulted in 903 SNPs. The second dataset was constructed by selecting loci without missing data, pruning for linkage disequilibrium with a criterion of  $r^2=0$ , and then selecting highly variable loci (with minor allele frequency between 0.492 and 0.500; the lower frequency threshold being established empirically in order to achieve a required number of SNPs). This resulted in 993 SNPs.

The results of the CERVUS analysis were identical between the two datasets, and identified 23 groups of closely related individuals (parent-offspring and/or sibling groups). The results of the KINGROUP analysis were also consistent, identifying 21 of the kin groups from CERVUS as related at a full-sibling level, and two groups as related at a half-sibling level (with one discrepancy between the results from the two datasets). The closely related individuals were removed from the dataset, with only one individual per kin group retained. This way we obtained a dataset of 200 unrelated individuals, which was used in all the subsequent analyses.

## **Analysis of genetic differentiation in Eurasian FBDs**

### ***Methods***

We analysed population genetic structure using the LD-pruned FBD dataset. We used the Bayesian clustering methods with no prior population information as implemented in

ADMIXTURE (Alexander *et al.* 2009) and STRUCTURE (Pritchard *et al.* 2000). The maximum number of genetic clusters (K) assumed in these analyses was set to 14, equal to the number of the sampling sites. In ADMIXTURE, we used the termination criterion that stops the run when the log-likelihood increases by less than  $\varepsilon = 10^{-4}$  between iterations. To identify the optimal value of K, we applied a cross-validation method, where 10 datasets were created by removing 10% of the genotypes at random, analysed as described above, and variation in the results was compared between different K values. The K value that exhibited the lowest cross-validation error was considered as the optimal K.

STRUCTURE was run assuming K from 1 to 14, with 100,000 MCMC iterations preceded by 20,000 burn-in iterations. We used the admixture model with correlated allele frequencies and ran three replicates for each K value. Selection of optimal K was carried out taking into account likelihood and Evanno *et al.* (2005)  $\Delta K$  values.

In addition, we carried out a spatially explicit analysis of genetic structure using the software GENELAND (Guillot *et al.* 2008). The spatially explicit analyses are more computationally demanding, and we thus reduced the number of SNPs by carrying out a more stringent pruning for LD using the criterion of  $r^2 < 0.1$ , which resulted in a set of 43,024 SNPs. The analysis was run with four independent replicates for 10,000 MCMC iterations with 1,000 burn-in iterations, for K values between 1 and 14. The model assuming correlated allele frequencies among populations was used.

We assessed the presence of an isolation-by-distance pattern in the FBDs across Eurasia by testing for a correlation between  $F_{ST}/(1-F_{ST})$  and the natural logarithm of geographic distance using a simple (univariate) Mantel test implemented in GENALEX 6.5 (Peakall & Smouse 2012). We also used GENALEX to carry out a spatial autocorrelation analysis based on pair-wise  $F_{ST}$  values between 14 sampling sites.

## ***Results***

ADMIXTURE indicated  $K=2$  as the most likely number of clusters, but most individuals were admixed between these two clusters without clear biological interpretation. Most European FBDs had higher assignment probabilities to one cluster, while most Middle Eastern and East Asian FBDs had higher assignment to the second cluster. Most Central/West Asian individuals had nearly equal assignment probabilities to each cluster (Supplementary Fig. 1A). Individual assignment  $K=3$  provided a clearer biological scenario, with one cluster defining the populations from the Middle East (Saudi Arabia and Iraq), the second cluster defining the populations from East Asia (China and Thailand), while most individuals from Europe, Central/West Asia and East Russia had an admixed ancestry between all three genetic clusters. At  $K=4$  a clearer distinction between European and Central/West Asian populations was obtained. Larger values of  $K$  did not reveal further geographically-defined clusters (Supplementary Fig. 1A).

Genetic clustering patterns inferred in STRUCTURE were consistent with those described for ADMIXTURE. Both likelihood and Evanno's  $\Delta K$  values indicated  $K=5$  as the optimum number of clusters, but the fifth genetic cluster did not have any clear biological interpretation and its addition caused little change in the clustering patterns relative to  $K=4$  (Supplementary Fig. 1B).

GENELAND analysis resulted in considerable inconsistencies between replicates, with  $K$  value indicated as optimal varying between 8 and 12. The geographic distribution of the inferred genetic clusters was largely inconsistent between different runs, and did not show any clear spatial pattern, except for populations from Saudi Arabia and Iraq being consistently grouped together.

The Principal Component Analysis (PCA) based on individual pair-wise distances showed little clustering, reflecting a large degree of similarity among FBD populations. The

PC1 differentiated East Asian and Middle Eastern dogs from European and Central/West Asian dogs (Supplementary Fig. 2A), while PC2 did not correspond to any clear geographic division. PC3 differentiated East Asia from the Middle East, with other regions having intermediate positions (Supplementary Fig. 2B). FBDs from Europe and Central/West Asia were not clearly differentiated. Similarly, PCA based on population-level pair-wise  $F_{ST}$  between sampling sites grouped together Europe, Central/West Asia and East Russia into a single cluster. This cluster was differentiated from the Middle Eastern populations at PC1 and from East Asian population at PC2 (Supplementary Fig. 2C).

Weak population differentiation was also supported by a tree of inter-individual identity-by-state (IBS) distances (Supplementary Fig. 3), where dogs from different sampling locations and broader regions of Eurasia did not form geographically distinct clades. Individuals from the Middle East were an exception, as they grouped into a single sub-clade, although within a larger clade containing dogs from multiple geographic locations. This pattern suggests that the Middle Eastern dogs have been relatively isolated from other dog populations in West Asia, but only recently.

Finally, we found a weak, but significant correlation between genetic differentiation ( $F_{ST}/(1-F_{ST})$  coefficient) among the 14 sampling sites and their geographic distance ( $R^2=0.056$ ,  $P=0.041$ ; Supplementary Fig. 4A). The spatial autocorrelation analysis showed a trend of declining autocorrelation for distance classes between 1,000 and 4,000 km, and no dependence of spatial autocorrelation on geographic distance for larger distance classes (5,000-9,000 km; Supplementary Fig. 4B). The heterogeneity test was significant at the whole correlogram level ( $P=0.002$ ).

## Estimation of differences in past effective population size between local FBD populations

### Methods

We estimated effective population sizes ( $N_E$ ) based on the extent of LD, measured as  $r^2$  coefficient, using the method described in Tenesa *et al.* (2007). We estimated  $N_E$  using the equation  $E(r^2) = 1/(\alpha + 4N_E c) + 1/n$ , where  $c$  is the genetic distance between loci in Morgans, and  $1/n$  is the adjustment for small sample size (Hayes *et al.* 2003). The parameter  $\alpha = 1$  is assumed in the absence of mutations, and  $\alpha = 2$  if mutations are accounted for. Here the assumption of  $\alpha = 2$  is more accurate, but because our goal was not to accurately reconstruct the demographic history, but to assess whether any population has higher historical  $N_E$  values compared to other populations, we used both  $\alpha = 1$  and  $\alpha = 2$  to check whether this may affect our conclusions.

Average  $r^2$  values were calculated within 20 distance classes between 2.5 kb and 1 Mb. Assuming that 1Mb = 1 cMorgan, they correspond to 0.0025–1 cMorgan. Each genetic distance ( $c$ ) and its associated average  $r^2$  value corresponds to a  $N_E$  estimate in a particular time in the past (measured in generations), estimated as  $t \approx 1/(2c)$  (Hayes *et al.* 2003). The distance classes considered here provide  $N_E$  estimates in a period between 50 and 20,000 generations ago, or between 150 and 60,000 years ago, if we assume a 3-year generation time, estimated for grey wolves (Mech & Seal 1987). Although the generation time of modern dogs may be shorter (Freedman *et al.* 2014), it is unclear when the generation turnover became accelerated. However, the generation time assumed does not affect the relative  $N_E$  comparisons between different regions. Because the timing of the demographic changes estimated using this approach is not precise (as it assumes a linear relation between the recombination distance and time, which does not hold for all demographic scenarios; Hayes *et al.* 2003), we did not use this approach to estimate the absolute timing of demographic events

in the dog evolutionary history, but only to identify differences in the demographic history of different regional populations.

### **Results**

We inferred temporal variation in effective population sizes ( $N_E$ ) in FBD populations from LD patterns. This method of inferring past population dynamics is less precise than methods based on genome re-sequencing data (e.g. see Freedman *et al.* 2014), therefore we did not use it to obtain accurate reconstruction of population dynamics. We instead used this analysis to identify differences in the demographic history of different regional populations. LD-based  $N_E$  estimates are expected to be higher in source populations relative to derived populations in time periods preceding their split, as seen in African vs non-African human populations (McEvoy *et al.* 2011). We found that, independently of the value assumed for the model parameter alpha, Chinese FBDs had higher  $N_E$  estimates than any other FBD population throughout all the time periods assessed (Supplementary Fig. 7). The populations from Thailand and Mongolia had intermediate  $N_E$  estimates between the Chinese population and all the remaining populations until about 2,500 years ago, and in the following time periods had comparable  $N_E$  estimates to West Eurasian populations.

### **Measures of fit for the TREEMIX trees**

Residuals from the TREEMIX tree without migration events indicated populations that did not fit well the tree model, with SE of the residual covariance exceeding 60 (Supplementary Fig. 16A). Such high residual covariance was due to two FBD populations from Saudi Arabia showing signs of admixture with grey wolves. Indeed, the addition of 10 migration edges revealed gene flow from wolves to these FBD populations, and improved the overall fit of the model, with SE of the residual covariance below 19 (Supplementary Fig. 16B). In consistence with this, P-values of all these 10 inferred migration edges obtained from the jackknife

analysis were below 0.0004, indicating that the inclusion of these gene flow events significantly improves the fit of this phylogenetic model to the data. The TREEMIX tree with 15 migration edges did not result in considerably better residual fit as compared with 10 migration edges, but additional gene flow events suggested by the residual plot were either between pairs of pure-breeds or between adjacent FBD populations (Supplementary Fig. 16C).

### **Assessment of the population divergence chronology in the evolutionary history of extant dogs**

We used the program KIMTREE (Gautier & Vitalis 2013) to identify the tree topology that constitutes the most likely representation of the evolutionary history of extant dogs. KIMTREE uses Kimura's time-dependent solution of the diffusion equation describing genetic drift to estimate population divergence times. These time estimates are conditional on a history of population splits, which are represented as either bifurcations or polytomies. The estimates of branch lengths (reflecting the divergence times) can be obtained for different topologies, which can be subsequently compared using the deviance information criterion (Spiegelhalter *et al.* 2002).

In order to achieve relatively large sample sizes, we applied this analysis to five dog groups, identified based on the genetic structure and phylogenetic analyses described above. This included (a) FBDs from Western Eurasia (Europe and Central/West Asia), (b) FBDs from the Middle East, (c) FBDs from East Asia, (d) modern European breeds, (e) East Asian and Arctic breeds. We excluded dog breeds with ambiguous positions in the dog phylogeny, including European spitz-type breeds, Eurasier, and Tibetan terrier. We pruned the dataset from loci with  $MAF < 0.01$  and more than 10% of missing data, as well as loci in strong linkage disequilibrium (with the threshold of  $r^2 < 0.5$ ). This resulted in 104,769 SNPs. Due to



limitations associated with computer memory, we could not complete the KIMTREE analysis using this entire dataset. Therefore, we divided the data into two datasets with almost equal number of SNPs (52,384 and 52,385). The analysis of these two datasets provided us with two pseudo-replicates, which gave very consistent results, supporting their validity.

### **Assessment of an indigenous status of East Asian FBDs**

To address the question of whether East Asian FBDs are indigenous, i.e. whether there is evidence for the long-term presence of these lineages in East Asia, we analysed an additional SNP dataset obtained from published whole-genome sequences of dogs and wolves (Wang *et al.* 2013, Freedman *et al.* 2014, Gou *et al.* 2014), available in the DogSD database (Bai *et al.* 2015; <http://dogsd.big.ac.cn>). We analysed 40 individuals, including: 7 Chinese indigenous dogs from Diqing, 3 Chinese indigenous dogs from Lijiang, 3 Chinese indigenous dogs from Yingjiang, 4 Tibetan mastiffs, 1 Australian dingo, 1 Basenji, 4 Kunming dogs (a modern Chinese breed originating from an admixture of German shepherds with local cross-breed dogs), 4 German shepherds, 1 Malinois, and 8 grey wolves from China, Russia, Israel and Croatia. We used PLINK to merge SNP datasets downloaded from this database into one dataset, and prune it from loci with MAF<0.01 and loci in linkage disequilibrium ( $r^2<0.5$ ). We constructed a neighbour-joining tree of inter-individuals IBS distances, a maximum-likelihood tree of population divergence, and a PCA plot, using the methods described above.

The analysis of this SNP dataset showed that Chinese FBDs are distinct from modern dog breeds (where modern breeds included the Kunming dog – a modern Chinese breed of European origin), but cluster with the Australian dingo (Supplementary Fig. 20). The dingo is a wild domestic dog whose ancient East Asian origin and isolation from other dogs for at least 3,500 years is well documented by genetic and archaeological studies (Larson *et al.* 2012, Oskarsson *et al.* 2012, Sacks *et al.* 2013). Clustering of Chinese FBDs with the dingo

indicates that they belong to the East Asian lineage from which the dingo originated at least 3,500 years ago, supporting their indigenous origin. These results also demonstrate a clear genetic distinctiveness of Chinese FBDs from modern pure-breed dogs, with the exception of one individual that might be admixed with Kunming dogs.

## References

- Alexander DH, Novembre J, Lange K. 2009. Fast model-based estimation of ancestry in unrelated individuals. *Genome Res.* **19**, 1655–64. (doi:10.1101/gr.094052.109)
- Bai B, Zhao W-M, Tang B-X, Wang Y-Q, Wang L, Zhang Z, Yang H-C, Liu Y-H, Zhu J-W, Irwin DM, *et al.* 2015. DoGSD: the dog and wolf genome SNP database. *Nucl Acids Res.* **43**, D777–83. (doi:10.1093/nar/gku1174)
- Brown SK, Darwent CM, Sacks BN. 2013. Ancient DNA evidence for genetic continuity in Arctic dogs. *J Archaeol Sci.* **40**, 1279–88. (doi:10.1016/j.jas.2012.09.010)
- Brown SK, Darwent CM, Wictum EJ, Sacks BN. 2015. Using multiple markers to elucidate the ancient, historical and modern relationships among North American Arctic dog breeds. *Heredity* 24 June 2015. (doi:10.1038/hdy.2015.49)
- Evanno G, Regnaut S, Goudet J. 2005. Detecting the number of clusters of individuals using the software STRUCTURE: a simulation study. *Mol Ecol.* **14**, 2611–20. (doi:10.1111/j.1365-294X.2005.02553.x)
- Freedman AH, Gronau I, Schweizer RM, Ortega-Del Vecchyo D, Han E, Silva PM, Galaverni M, Fan Z, Marx P, Lorente-Galdos B, *et al.* 2014. Genome sequencing highlights the dynamic early history of dogs. *PLoS Genet.* **10**, e1004016. (doi:10.1371/journal.pgen.1004016)
- Gautier M, Vitalis R. 2013. Inferring population histories using genome-wide allele frequency data. *Mol Biol Evol.* **30**, 654–68. (doi:10.1093/molbev/mss257)

- Gou X, Wang Z, Li N, Qiu F, Xu Z, Yan D, Yang S, Jia J, Kong X, Wei Z, *et al.* 2014. Whole genome sequencing of six dog breeds from continuous altitudes reveals adaption to high-altitude hypoxia. *Genome Res.* **24**, 1308–1315. (doi:10.1101/gr.171876.113)
- Guillot G, Santos F, Estoup A. 2008. Analysing georeferenced population genetics data with Geneland: a new algorithm to deal with null alleles and a friendly graphical user interface. *Bioinformatics* **24**, 1406–1407. (doi:10.1093/bioinformatics/btn136).
- Hayes BJ, Visscher PM, McPartlan HC, Goddard ME. 2003. Novel multilocus measure of linkage disequilibrium to estimate past effective population size. *Genome Res.* **13**, 635–43. (doi:10.1101/gr.387103)
- Konovalov DA, Manning C, Henshaw MT. 2004. KINGROUP: a program for pedigree relationship reconstruction and kin group assignments using genetic markers. *Mol Ecol Notes.* **4**, 779–82. (doi:10.1111/j.1471-8286.2004.00796.x)
- Larson G, Karlsson EK, Perri A, Webster MT, Ho SYW, Peters J, Stahl PW, Piper PJ, Lingaas F, Fredholm M, *et al.* 2012. Rethinking dog domestication by integrating genetics, archeology, and biogeography. *Proc Natl Acad Sci USA.* **109**, 8878–8883. (doi:10.1073/pnas.1203005109)
- Marshall TC, Slate J, Kruuk LEB, Pemberton JM. 1998. Statistical confidence for likelihood-based paternity inference in natural populations. *Mol Ecol.* **7**, 639–55. (doi:10.1038/nature04338)
- McEvoy BP, Powell JE, Goddard ME, Visscher PM. 2011. Human population dispersal "Out of Africa" estimated from linkage disequilibrium and allele frequencies of SNPs. *Genome Res.* **21**, 821–829. (doi:10.1101/gr.119636.110)
- Mech LD, Seal US. 1987. Premature reproductive activity in wild wolves. *J Mammal.* **68**, 871–3. (doi:10.2307/1381570)

- Oskarsson MCR, Klütsch CFC, Boonyaparakob U, Wilton A, Tanabe Y, Savolainen P. 2012. Mitochondrial DNA data indicate an introduction through Mainland Southeast Asia for Australian dingoes and Polynesian domestic dogs. *Proc R Soc B London*. **279**, 967–974. (doi:10.1098/rspb.2011.1395)
- Parker HG, Kim LV, Sutter NB, Carlson S, Lorentzen TD, Malek TB, Johnson GS, DeFrance HB, Ostrander EA, Kruglyak L. 2004. Genetic structure of the purebred domestic dog. *Science*. **304**, 1160–1164. (doi:10.1126/science.1097406)
- Peakall R, Smouse PE. 2012. GenAlEx 6.5: genetic analysis in Excel. Population genetic software for teaching and research – an update. *Bioinformatics*. **28**, 2537–2539. (doi:10.1093/bioinformatics/bts460)
- Pickrell JK, Pritchard JK. 2012. Inference of population splits and mixtures from genome-wide allele frequency data. *PLoS Genet*. **8**(11), e1002967. (doi:10.1371/journal.pgen.1002967)
- Pritchard J, Stephens M, Donnelly P. 2000. Inference of population structure using multilocus genotype data. *Genetics*. **155**, 945–59.
- Sacks BN, Brown SK, Stephens D, Pedersen NC, Wu J-T, Berry O. 2013. Y chromosome analysis of dingoes and Southeast Asian village dogs suggests a Neolithic continental expansion from Southeast Asia followed by multiple Austronesian dispersals. *Mol Biol Evol*. **30**, 1103–18. (doi:10.1093/molbev/mst027)
- Spiegelhalter DJ, Best NG, Carlin BP, Linde AVD. 2002. Bayesian measures of model complexity and fit. *J Roy Stat Soc B*. **64**, 583–639.
- Stronen, AV, Jędrzejewska B, Pertoldi C, Demontis D, Randi E, Niedziałkowska M, Pilot M, Sidorovich VE, Dykyy I, Kusak J, *et al.* 2013. North-south differentiation and a region of high diversity in European wolves (*Canis lupus*). *PLoS ONE*. **8**(10), e76454. (doi:10.1371/journal.pone.0076454)

- Tenesa A, Navarro P, Hayes BJ, Duffy DL, Clarke GM, Goddard ME, Visscher PM. 2007. Recent human effective population size estimated from linkage disequilibrium. *Genome Res.* **17**, 520–26. (doi:10.1101/gr.6023607)
- van Asch B, Zhang A-B, Oskarsson MCR, Klütsch CFC, Amorim A, Savolainen P. 2013. Pre-Columbian origins of Native American dog breeds, with only limited replacement by European dogs, confirmed by mtDNA analysis. *Proc R Soc B London.* **280**, 2013.1142. (doi:10.1098/rspb.2013.1142)
- Vaysse A, Ratnakumar A, Derrien T, Axelsson E, Rosengren Pielberg G, Sigurdsson S, Fall T, Seppälä EH, Hansen MST, Lawley CT, *et al.* 2011. Identification of genomic regions associated with phenotypic variation between dog breeds using selection mapping. *PLoS Genet.* **7**(10), e1002316. (doi:10.1371/journal.pgen.1002316)
- vonHoldt BM, Pollinger JP, Lohmueller KE, Han E, Parker HG, Quignon P, Degenhardt JD, Boyko AR, Earl DA, Auton A, *et al.* 2010. Genome-wide SNP and haplotype analyses reveal a rich history underlying dog domestication. *Nature* **464**, 898–902. (doi:10.1038/nature08837)
- Wang G-D, Zhai W, Yang H-C, Fan R-X, Cao X, Zhong L, Wang L, Liu F, Wu H, Cheng L-G, *et al.* 2013. The genomics of selection in dogs and the parallel evolution between dogs and humans. *Nature Commun.* **4**, 1860. (doi:10.1038/ncomms2814)

## Supplementary Figure 1

A

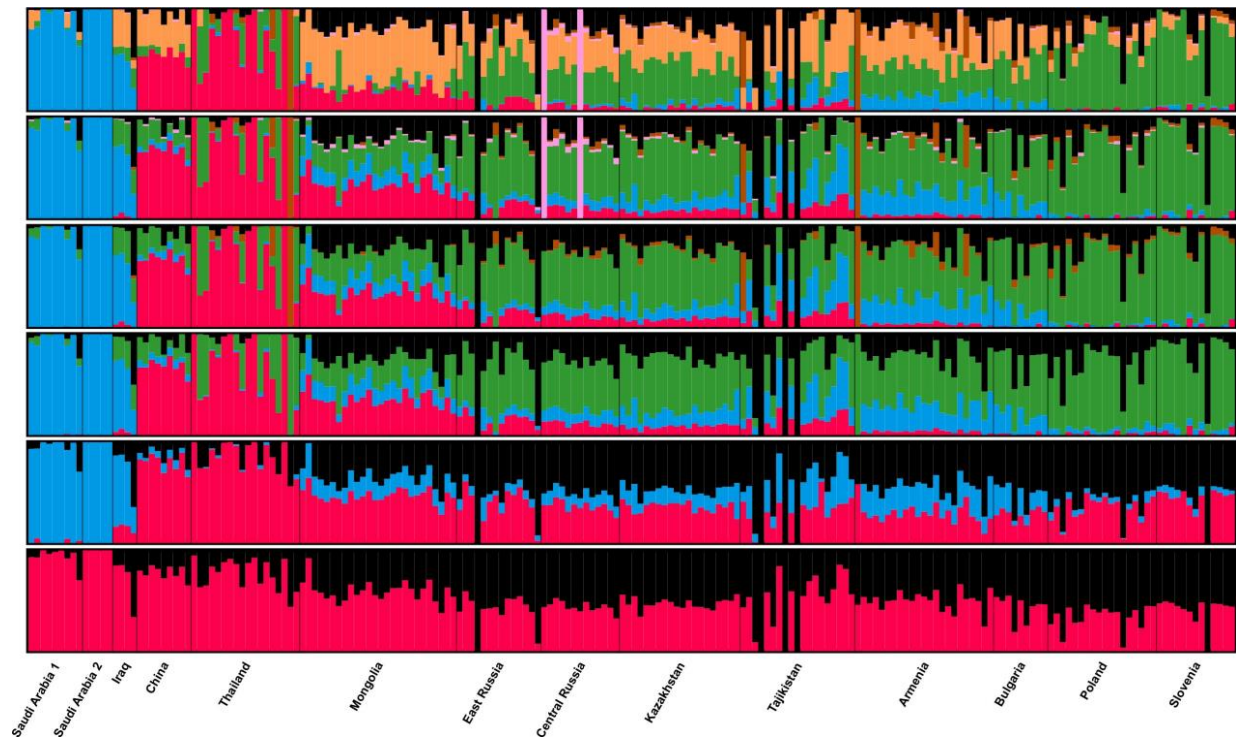

B

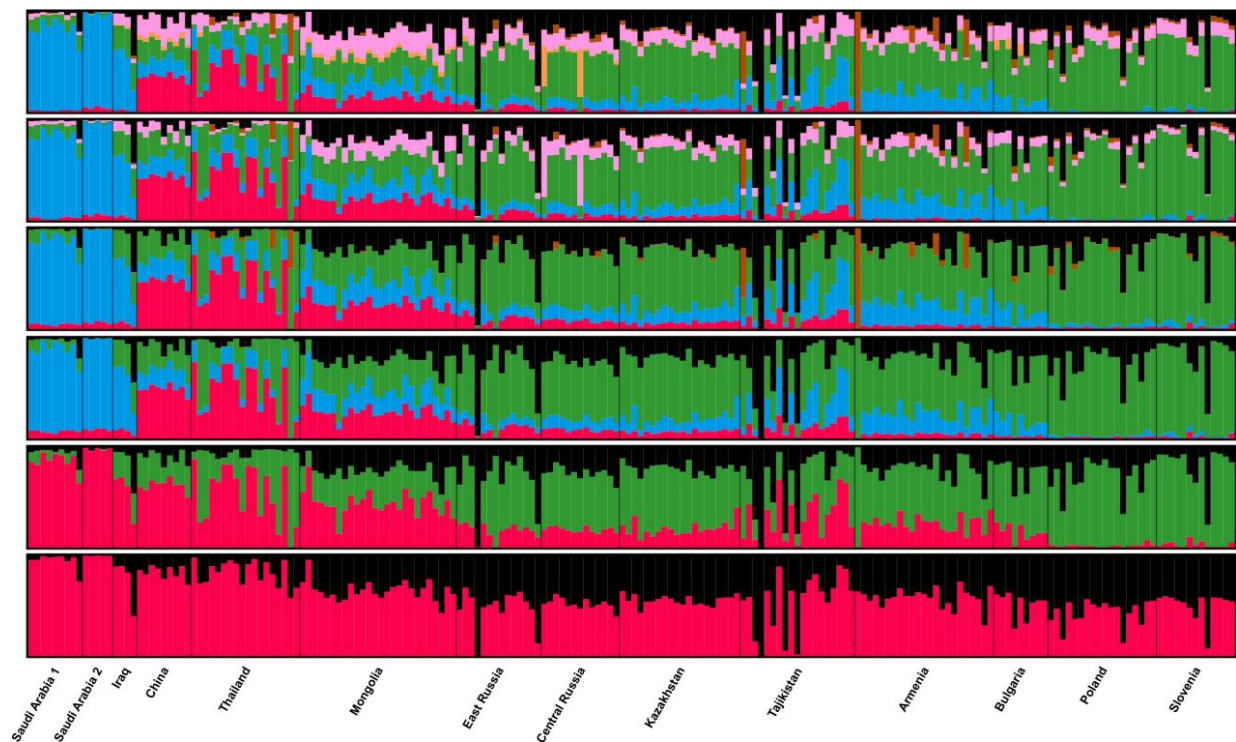

**Supplementary Figure 1. Population genetic structure in Eurasian FBDs.** Population genetic structure inferred using (A) ADMIXTURE and (B) STRUCTURE, for K between 2 (bottom) and 7 (top). Membership in different genetic populations is represented by different colours.

## Supplementary Figure 2

A

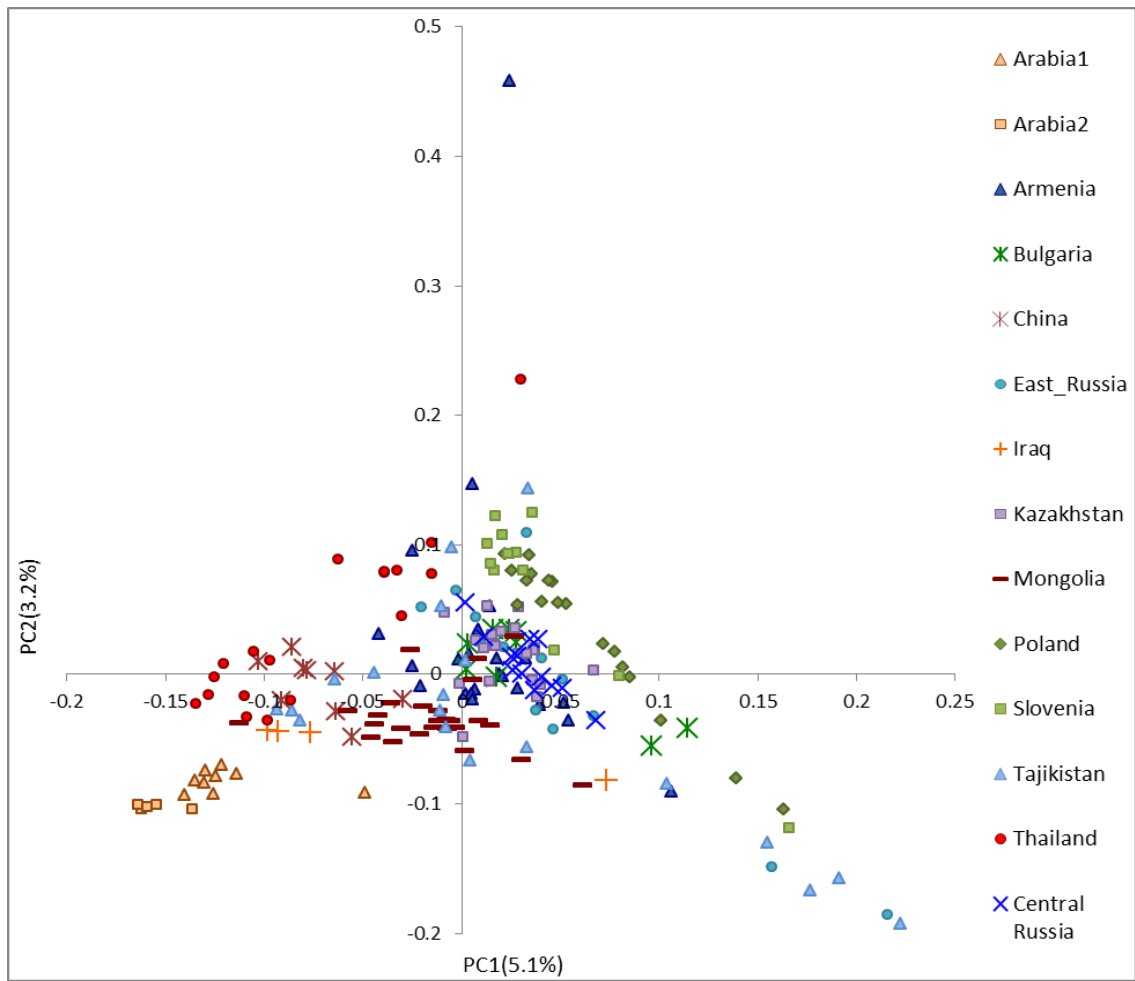

B

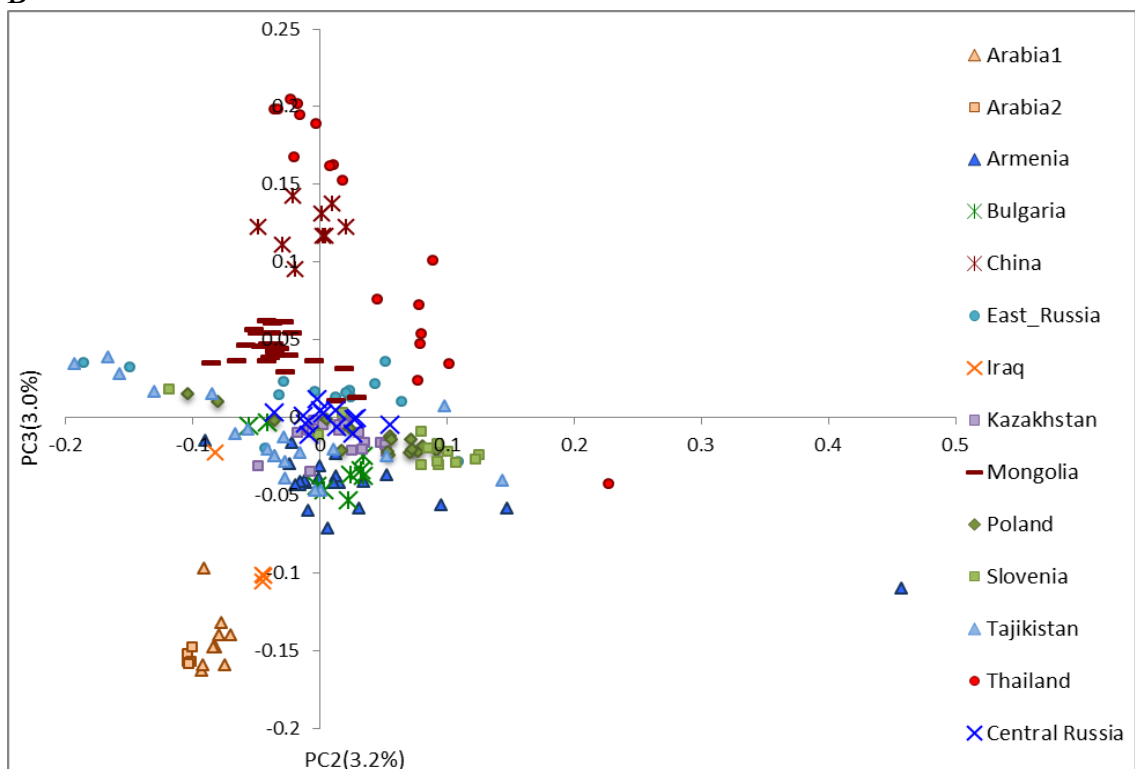

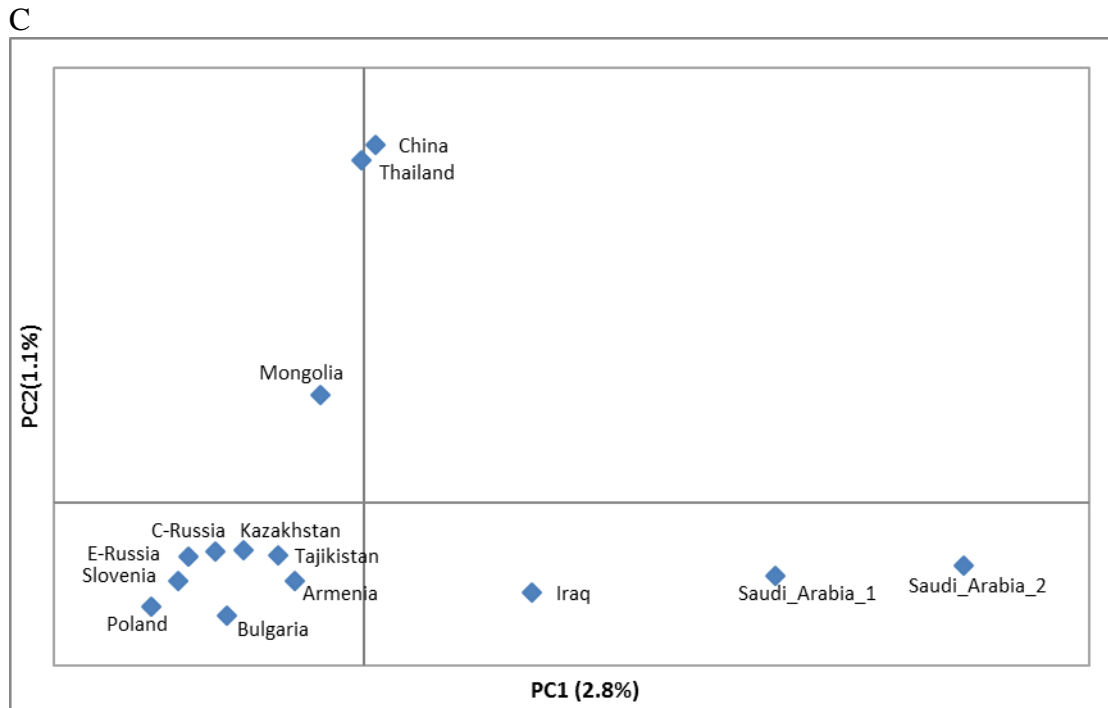

**Supplementary Figure 2. Principal Component Analysis of genetic differentiation among FBDs from different parts of Eurasia.** (A) Representing individual-based genetic distances: PC1 and PC2 (an outlier from Armenia groups with pure-breed dogs: see Supplementary Figure 8), (B) Representing individual-based genetic distances: PC2 and PC3. (C) Representing pair-wise  $F_{ST}$  between local populations of FBDs.



### Supplementary Figure 3

A

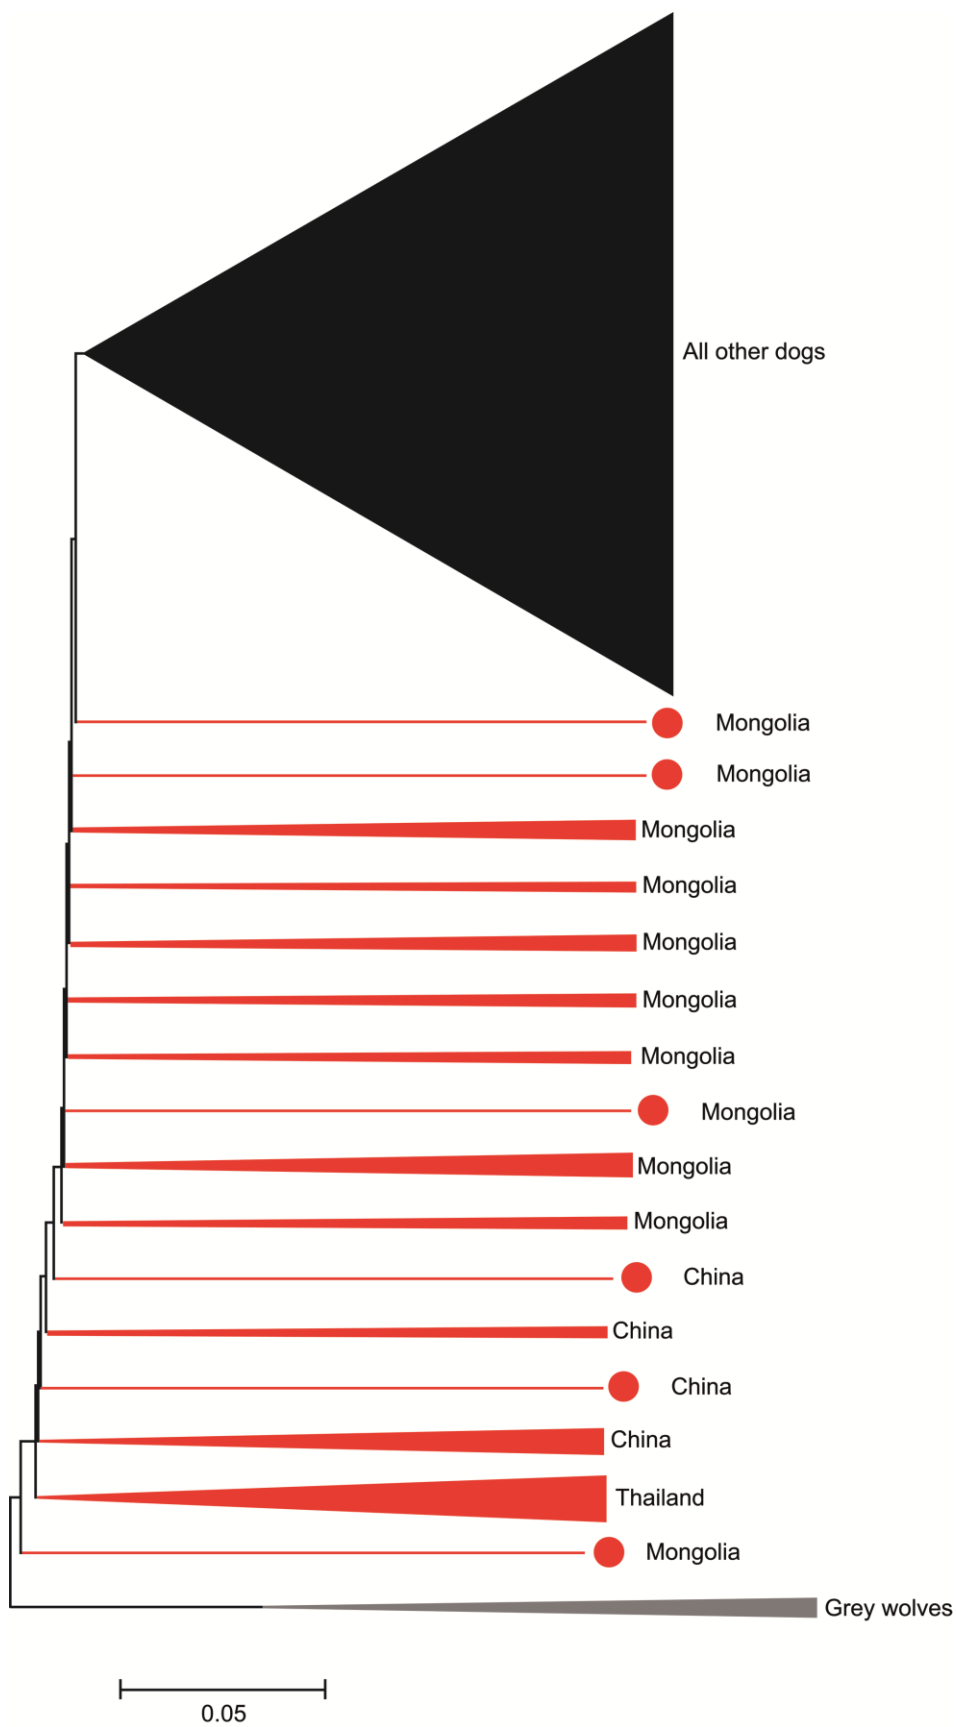

B

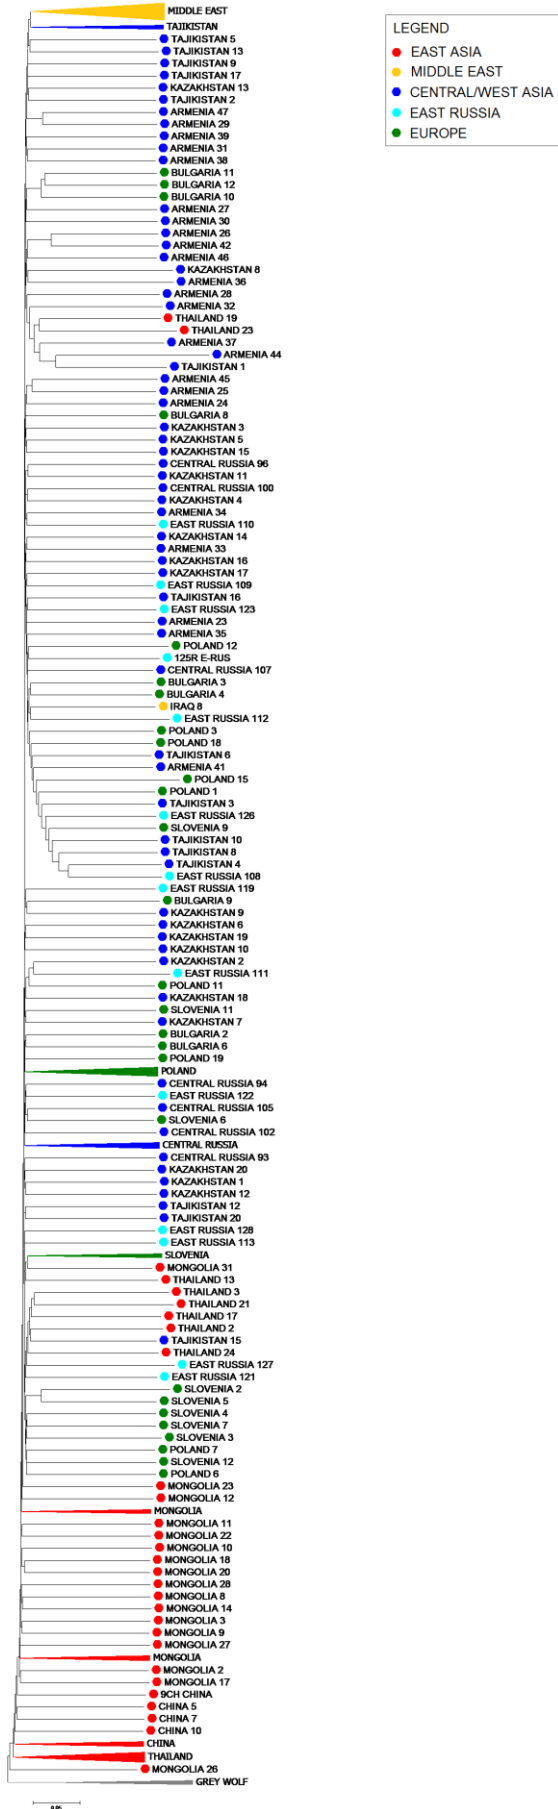

**Supplementary Figure 3. Tree of inter-individual IBS distances between FBDs. (A)**

Simplified tree with only individuals branching from basal nodes distinguished, while all the others are presented as one clade. (B) Detailed tree, with individuals from different regions are distinguished by colours. Individuals from the same geographic location or the same breed clustering together are represented as triangles.

## Supplementary Figure 4

A

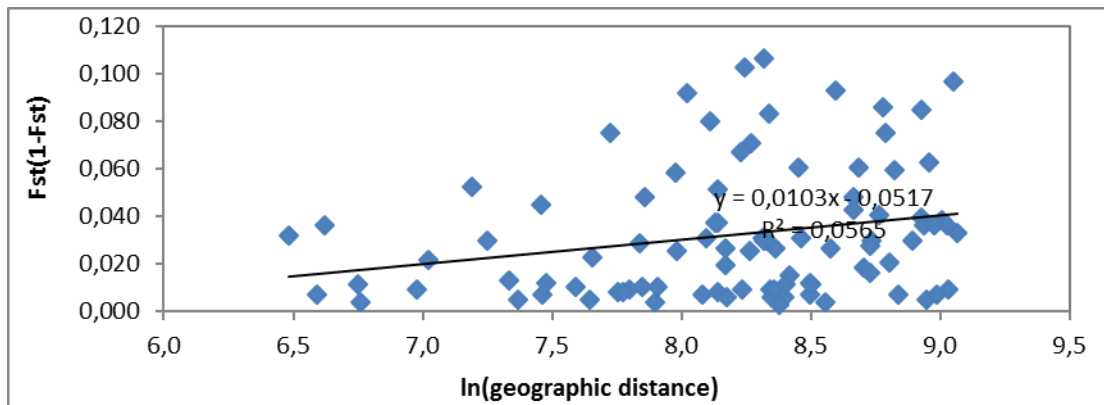

B

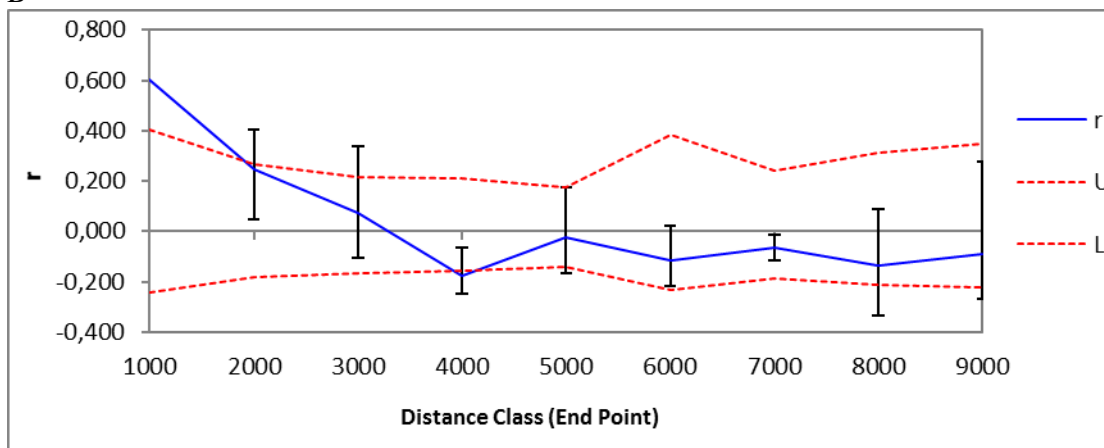

**Supplementary Figure 4. Genetic differentiation between local populations of FBDs in relation to their geographic distance.** (A) Relationship between transformed pair-wise  $F_{ST}$  values ( $F_{ST}/(1-F_{ST})$ ) and natural logarithm of geographic distance, illustrating isolation by distance pattern; (B) Spatial autocorrelation of genetic differentiation between populations, represented as pair-wise  $F_{ST}$ . “ $r$ ” denotes the autocorrelation coefficient, and U and L upper and lower limits of the 95% confidence interval for the null hypothesis of no autocorrelation.

## Supplementary Figure 5

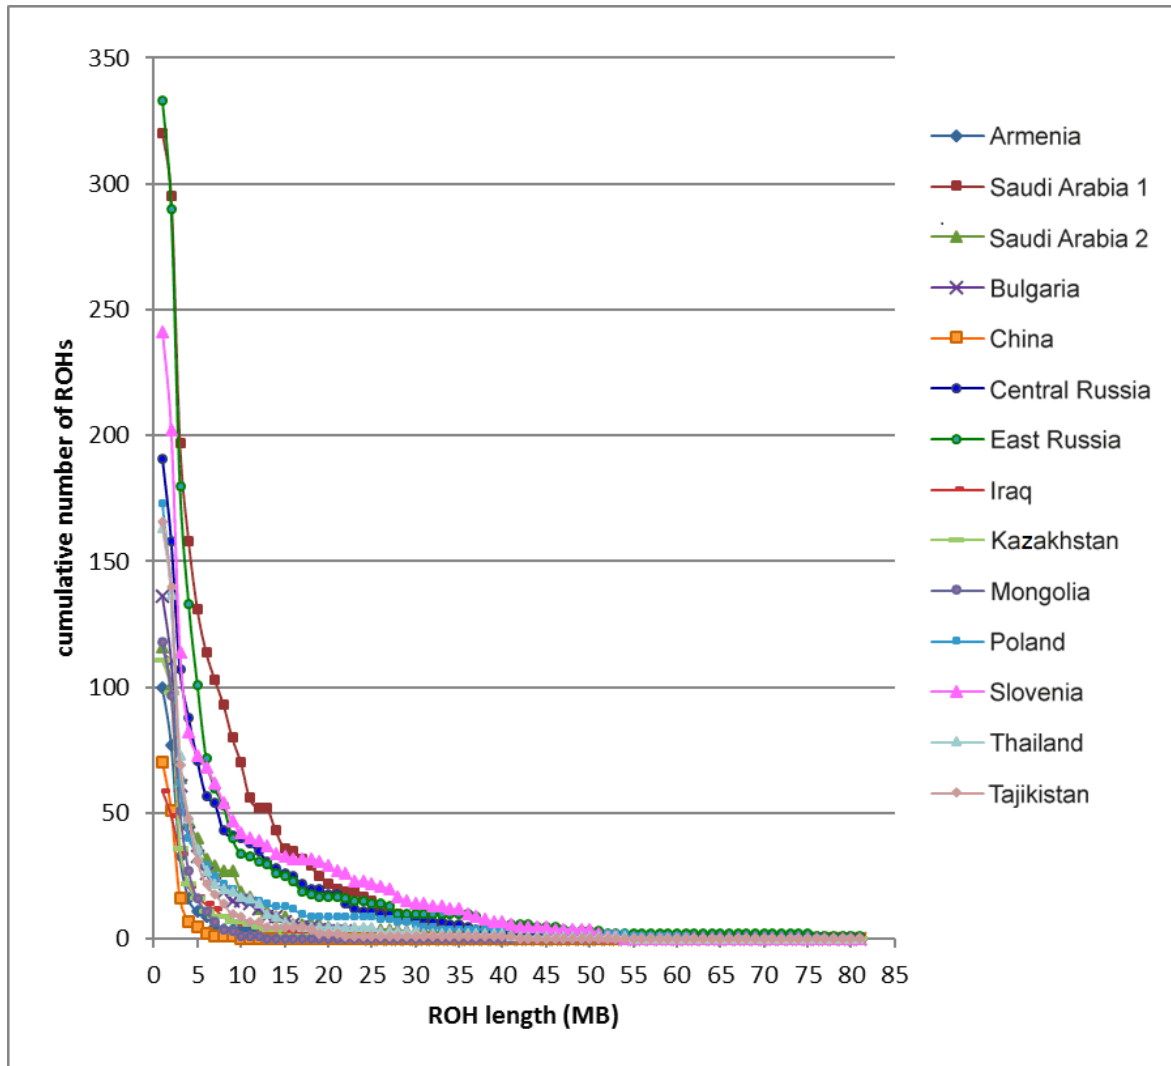

**Supplementary Figure 5. Frequency distribution of runs of homozygosity (ROHs), illustrating autozygosity levels in local populations of FBDs.** The vertical axis represents the cumulative number of ROHs of length equal to or greater than the length represented on the horizontal axis.

# Supplementary Figure 6

A

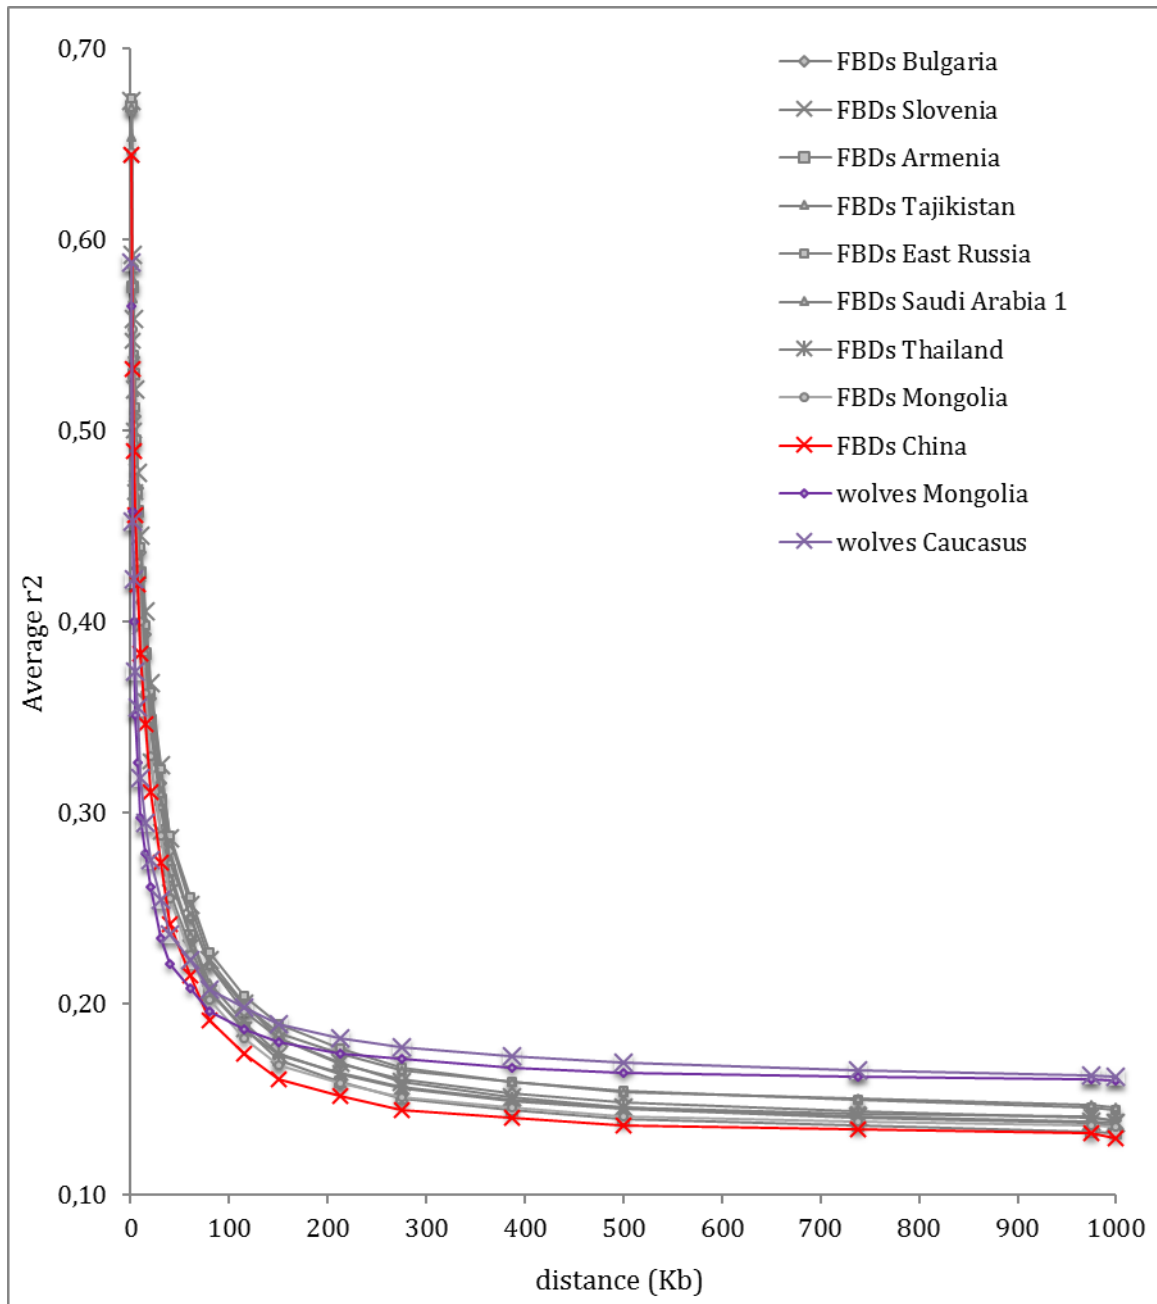

B

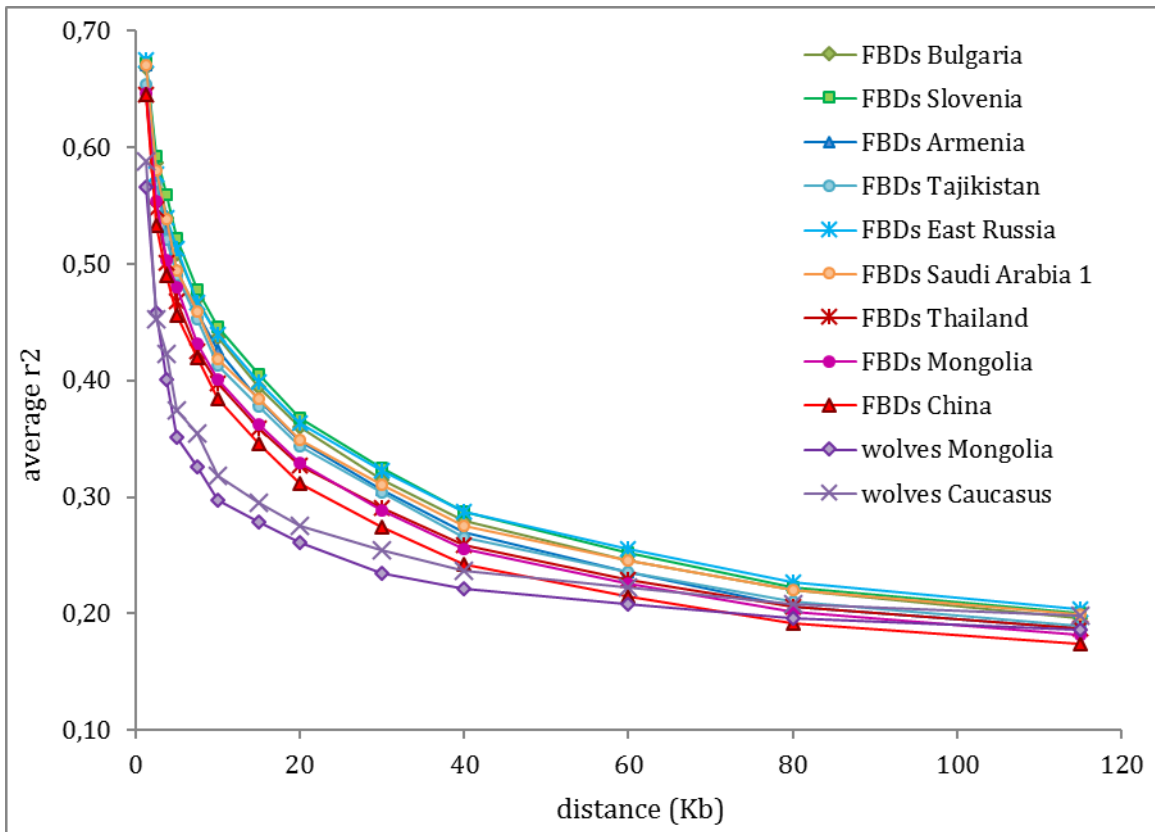

C

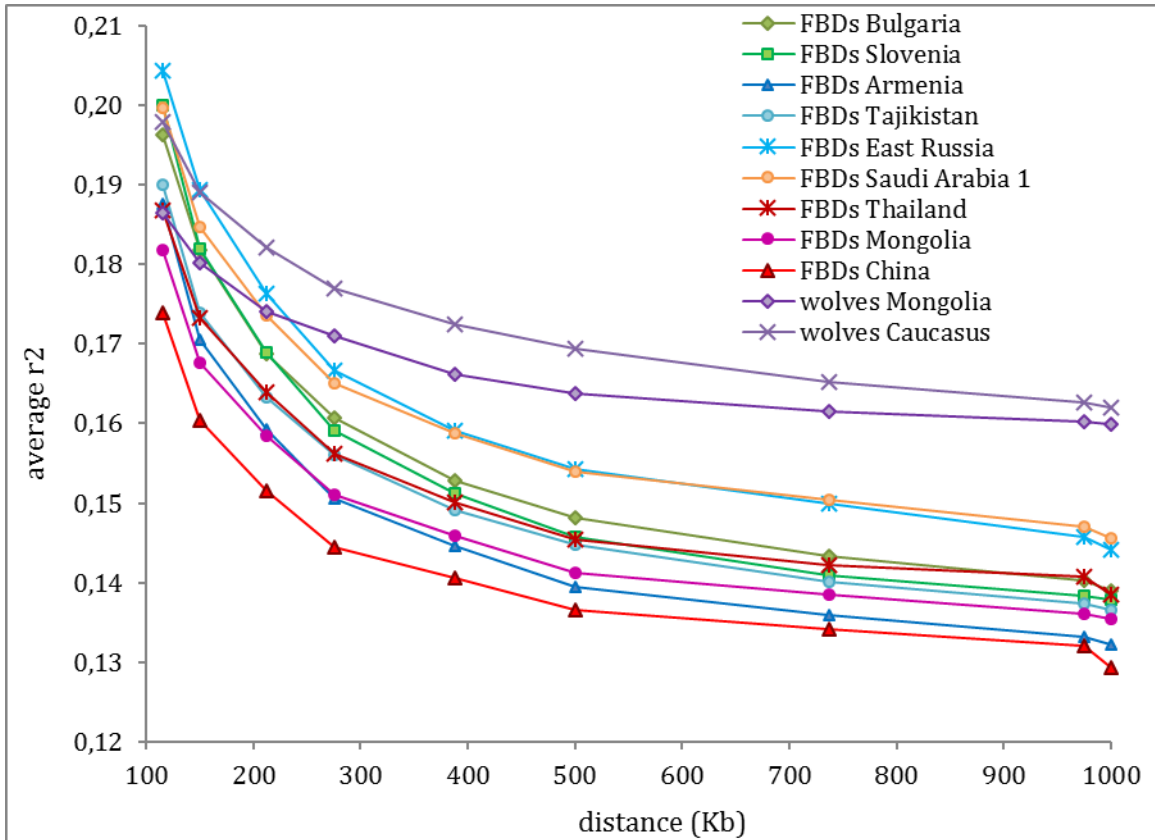

**Supplementary Figure 6. Linkage disequilibrium in selected populations of FBDs in comparison with grey wolves.** Linkage disequilibrium is represented by average genotypic association coefficient  $r^2$  and is plotted as a function of inter-SNP distance. The sample size for each local dog and wolf population was 9 individuals. (A) LD values for the entire range of genetic distances, with only Chinese FBD and wolf populations distinguished, (B) LD values for the genetic distances between 1.25 and 115 kb, (C) LD values for the genetic distances between 115 and 1000 kb. It is important to stress that this analysis did not include pure-breed dogs but only FBDs.



### Supplementary Figure 7

A

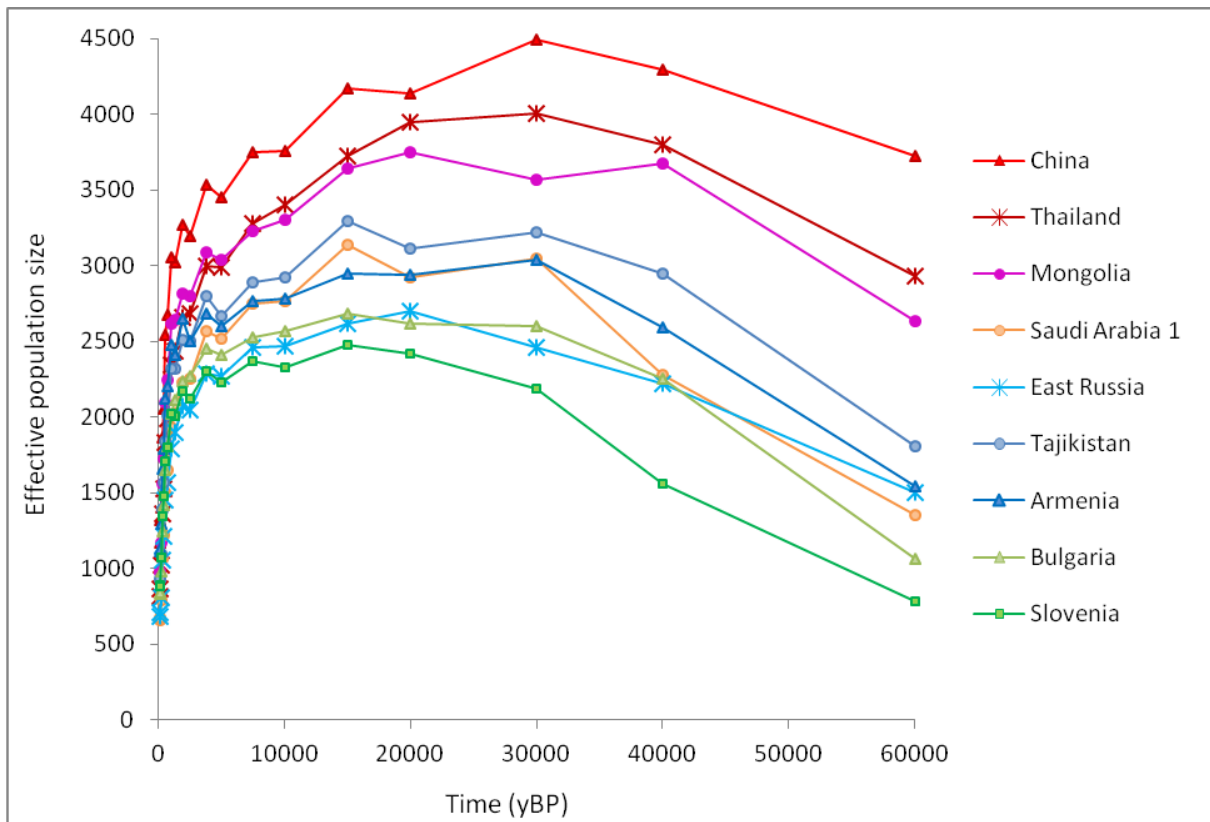

B

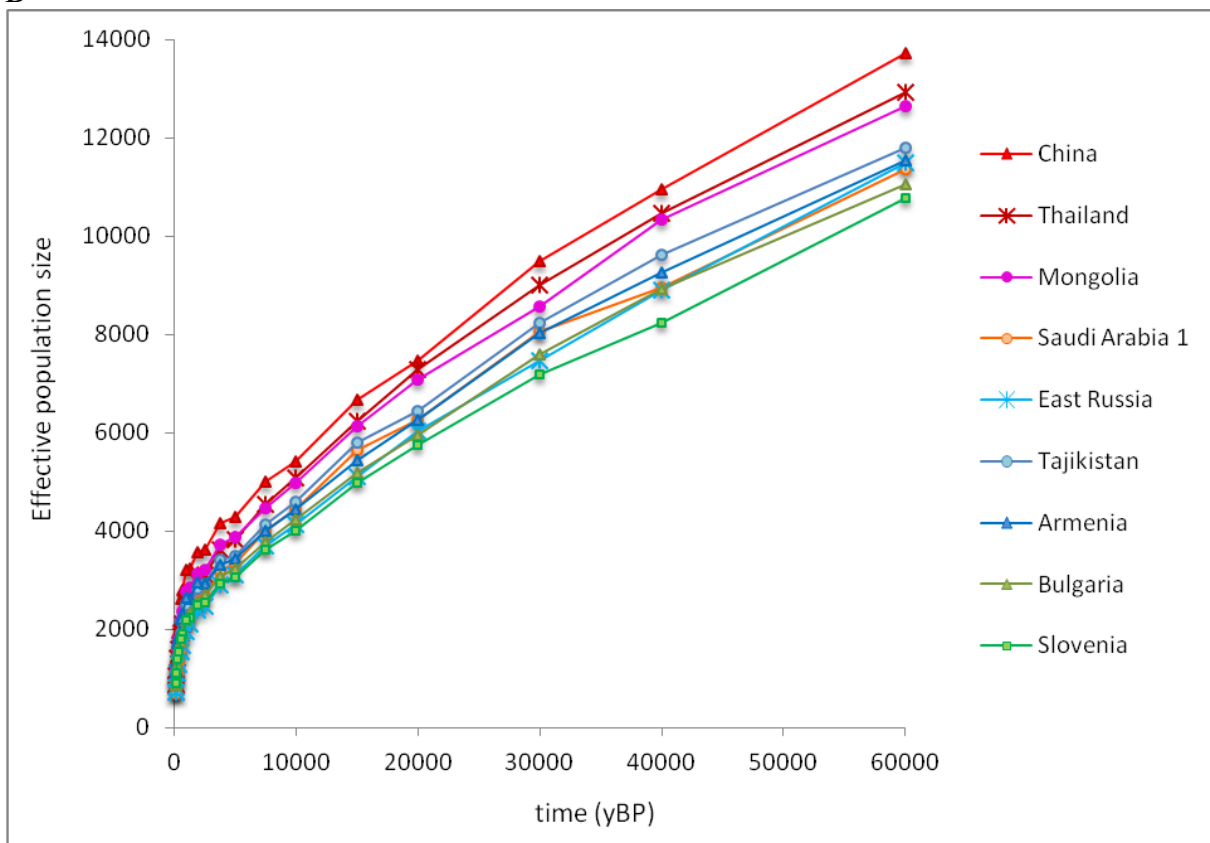

**Supplementary Figure 7. Temporal changes in effective population size of Eurasian FBD populations inferred from the linkage disequilibrium** (A) for  $\alpha = 2$ , (B) for  $\alpha = 1$ . Although none of these plots provides a correct representation of the dog population dynamics, they consistently show higher  $N_E$  estimates in China, Thailand and Mongolia compared to other regions, consistent with East Asian FBDs being ancestral to FBDs from other regions. It is important to stress that convergence of all the dog populations into a single  $N_E$  curve at times pre-dating domestication is not expected for LD-based estimates, but instead the ancestral populations are expected to have higher  $N_E$  estimates (see McEvoy *et al.* 2011).

Supplementary Figure 8

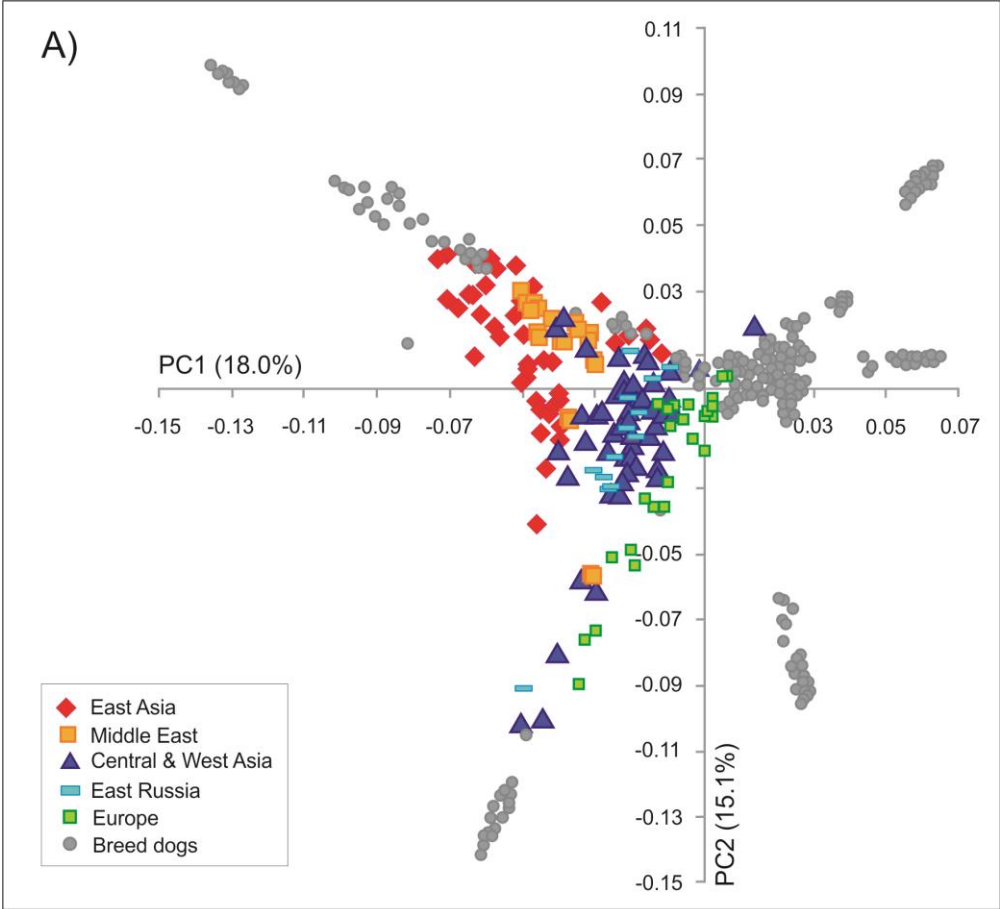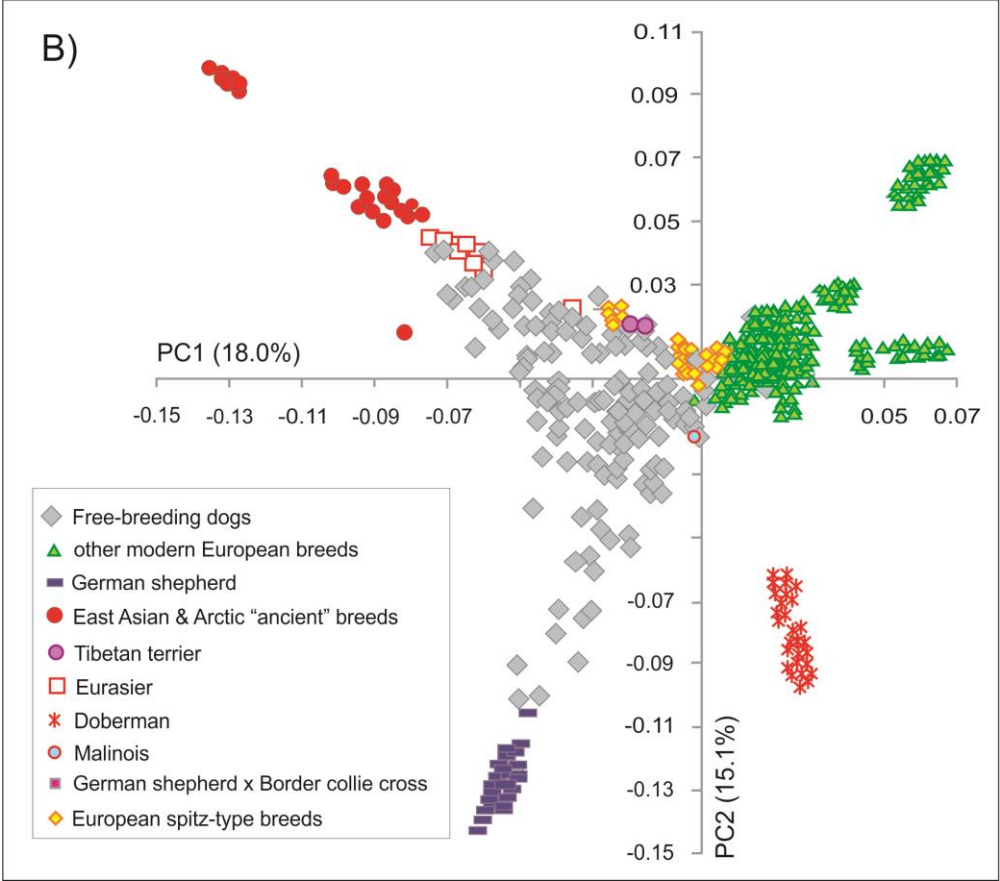

C

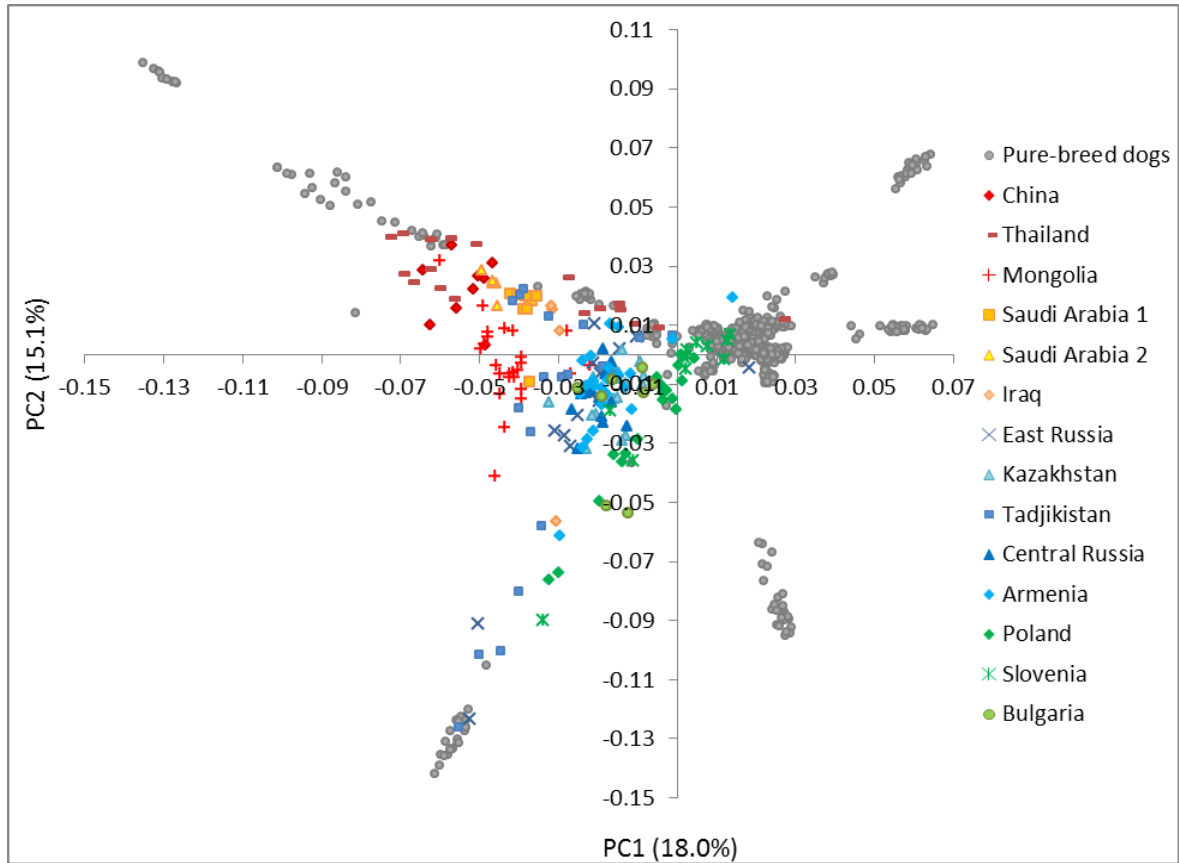

D

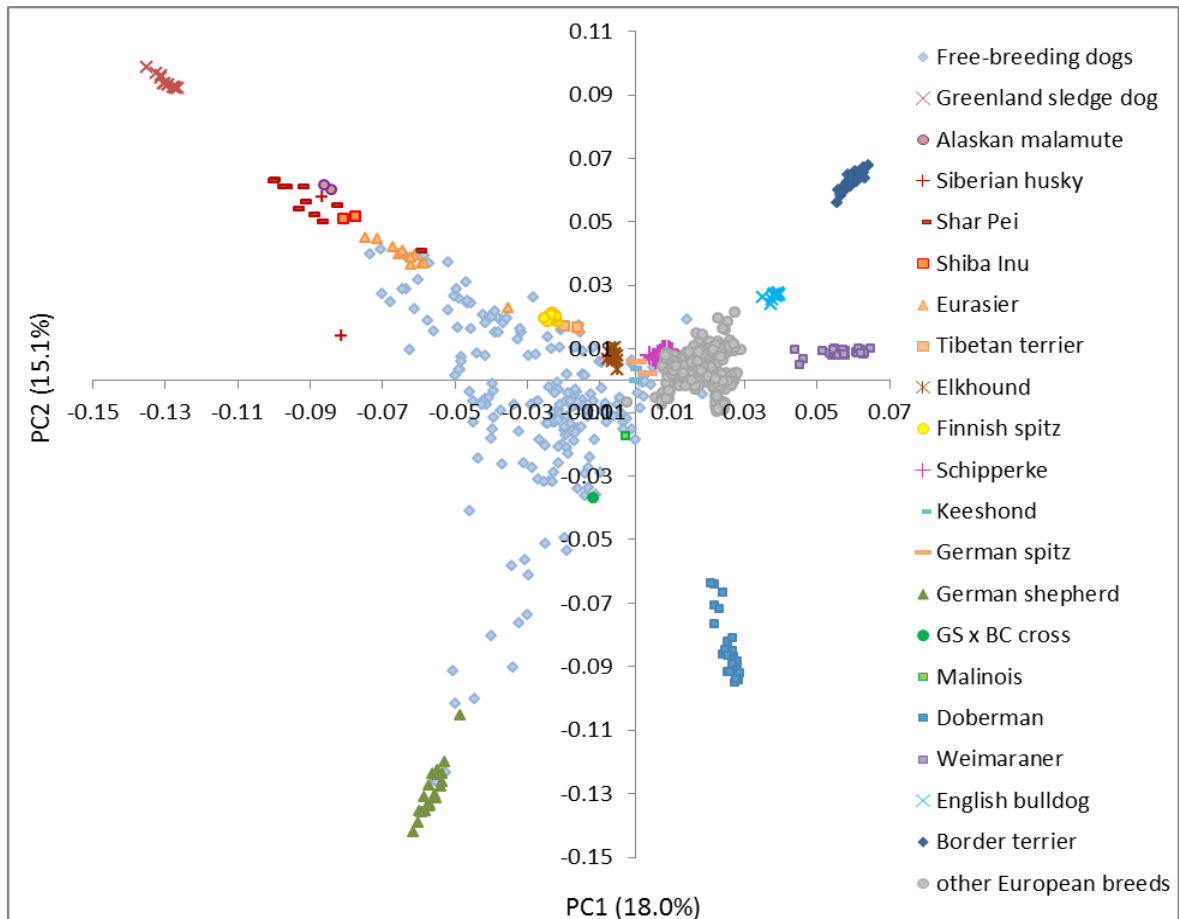

**Supplementary Figure 8. Principal component analysis of genetic differentiation among FBDs and pure-breed dogs.** (A) with FBDs from different regions distinguished by different symbols, (B) with groups of dog breeds distinguished by different symbols, (C) with local FBD populations distinguished by different symbols, (D) with individual dog breeds distinguished by different symbols. GS x BC cross – a F1 cross between German shepherd and Border collie.

## Supplementary Figure 9

A

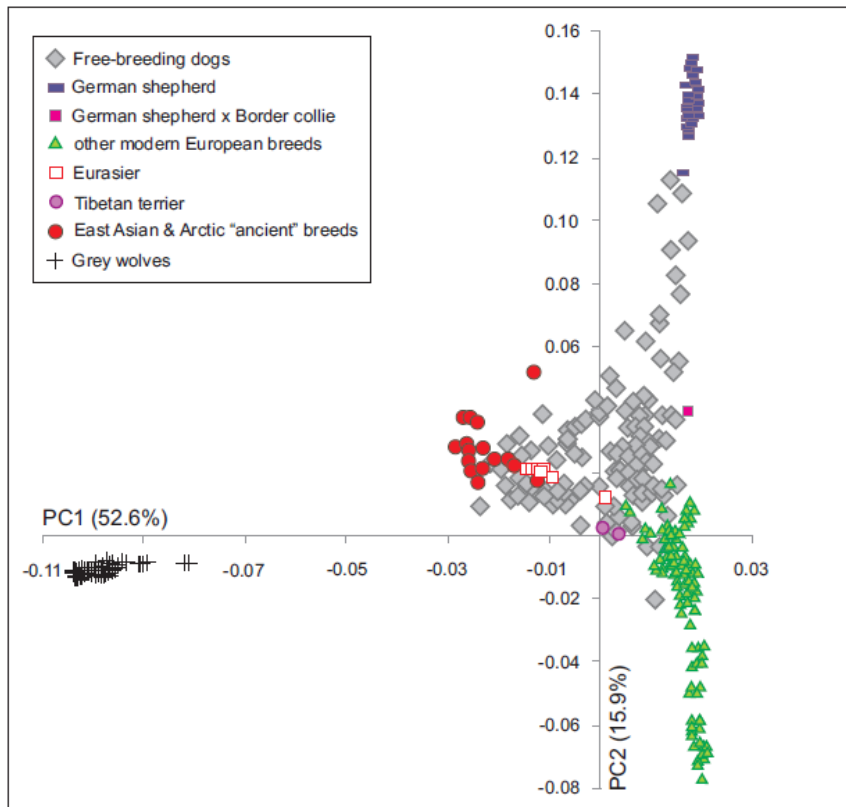

B

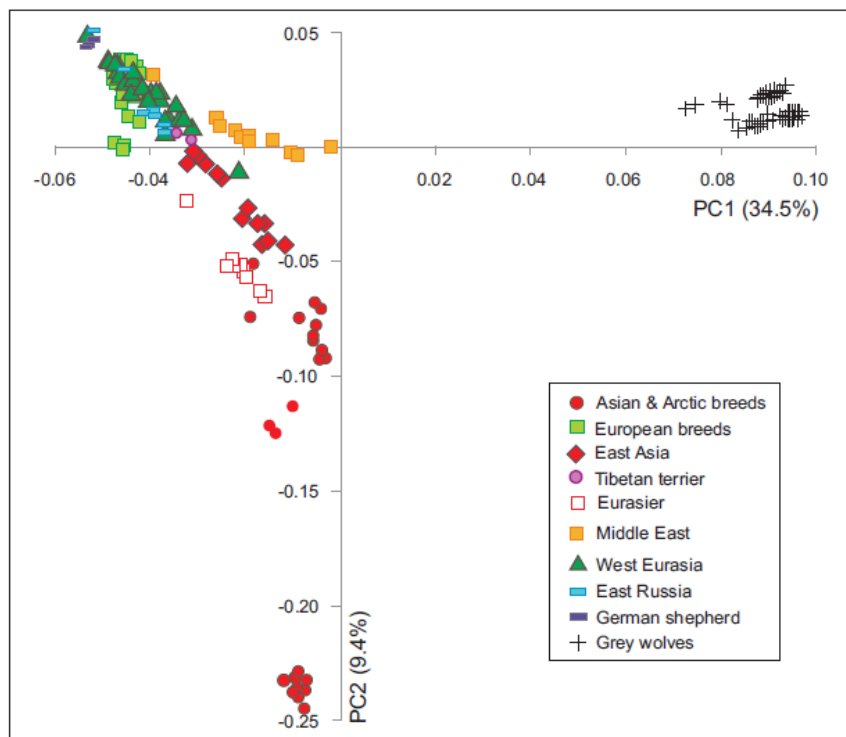

**Supplementary Figure 9. Principal component analysis of genetic differentiation among dogs and grey wolves.** (A) Including all non-related individuals from FBD, LUPA and UK databases and grey wolves (B) Based on a dataset reduced to even out the number of FBDs, "ancient" and modern dog breeds, and grey wolves. FBDs are labelled with region name.

Supplementary Figure 10

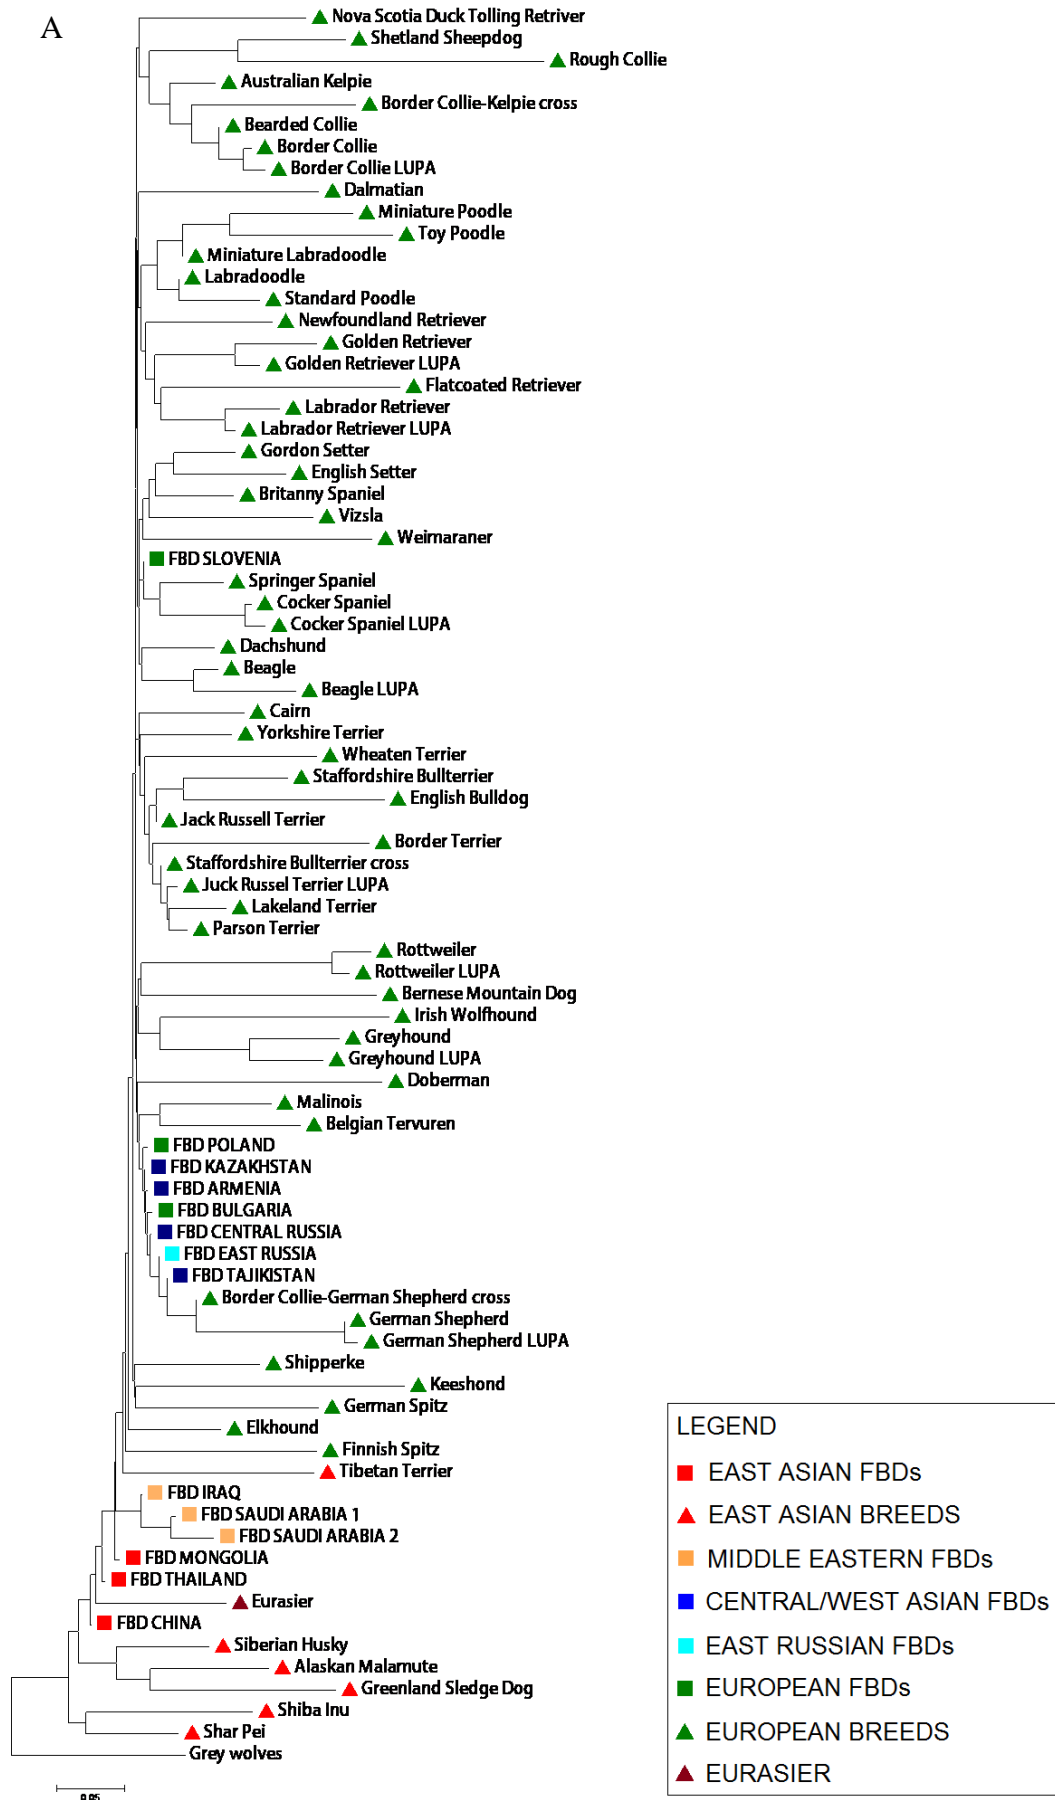

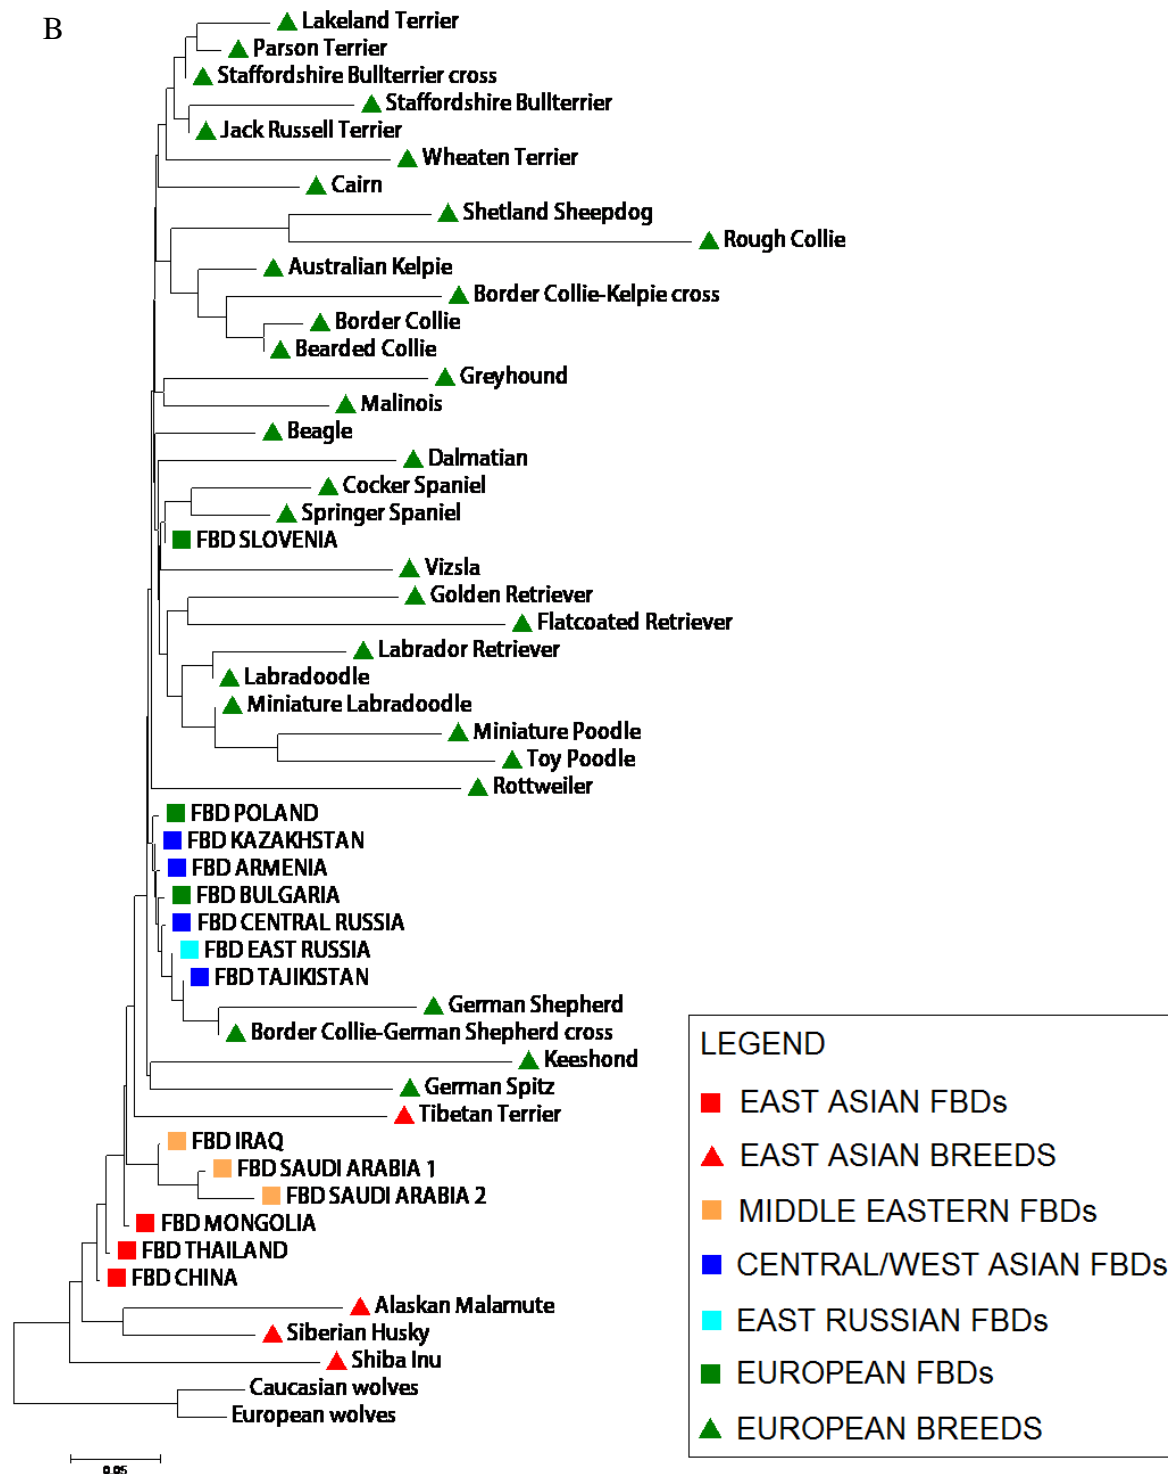

**Supplementary Figure 10. Neighbour-joining tree of  $F_{ST}$  distances:** (A) among FBD populations (marked with green circles) and pure breed dogs, with Caucasian wolves are used as an outgroup and (B) among FBD populations (marked with green circles) and pure breed dogs from the UK dataset. Both Caucasian and Eastern European wolves are used as an outgroup. Eastern European wolf genotypes are from Stronen *et al.* (2013). Pure breed dogs from the LUPA dataset (Vaysse *et al.* 2011) are not included here because genotype calling this dataset is incompatible with the Eastern European wolf dataset. Comparison between (A) and (B) shows that using a larger set of wolves as an outgroup does not change the tree topology.



Supplementary Figure 11

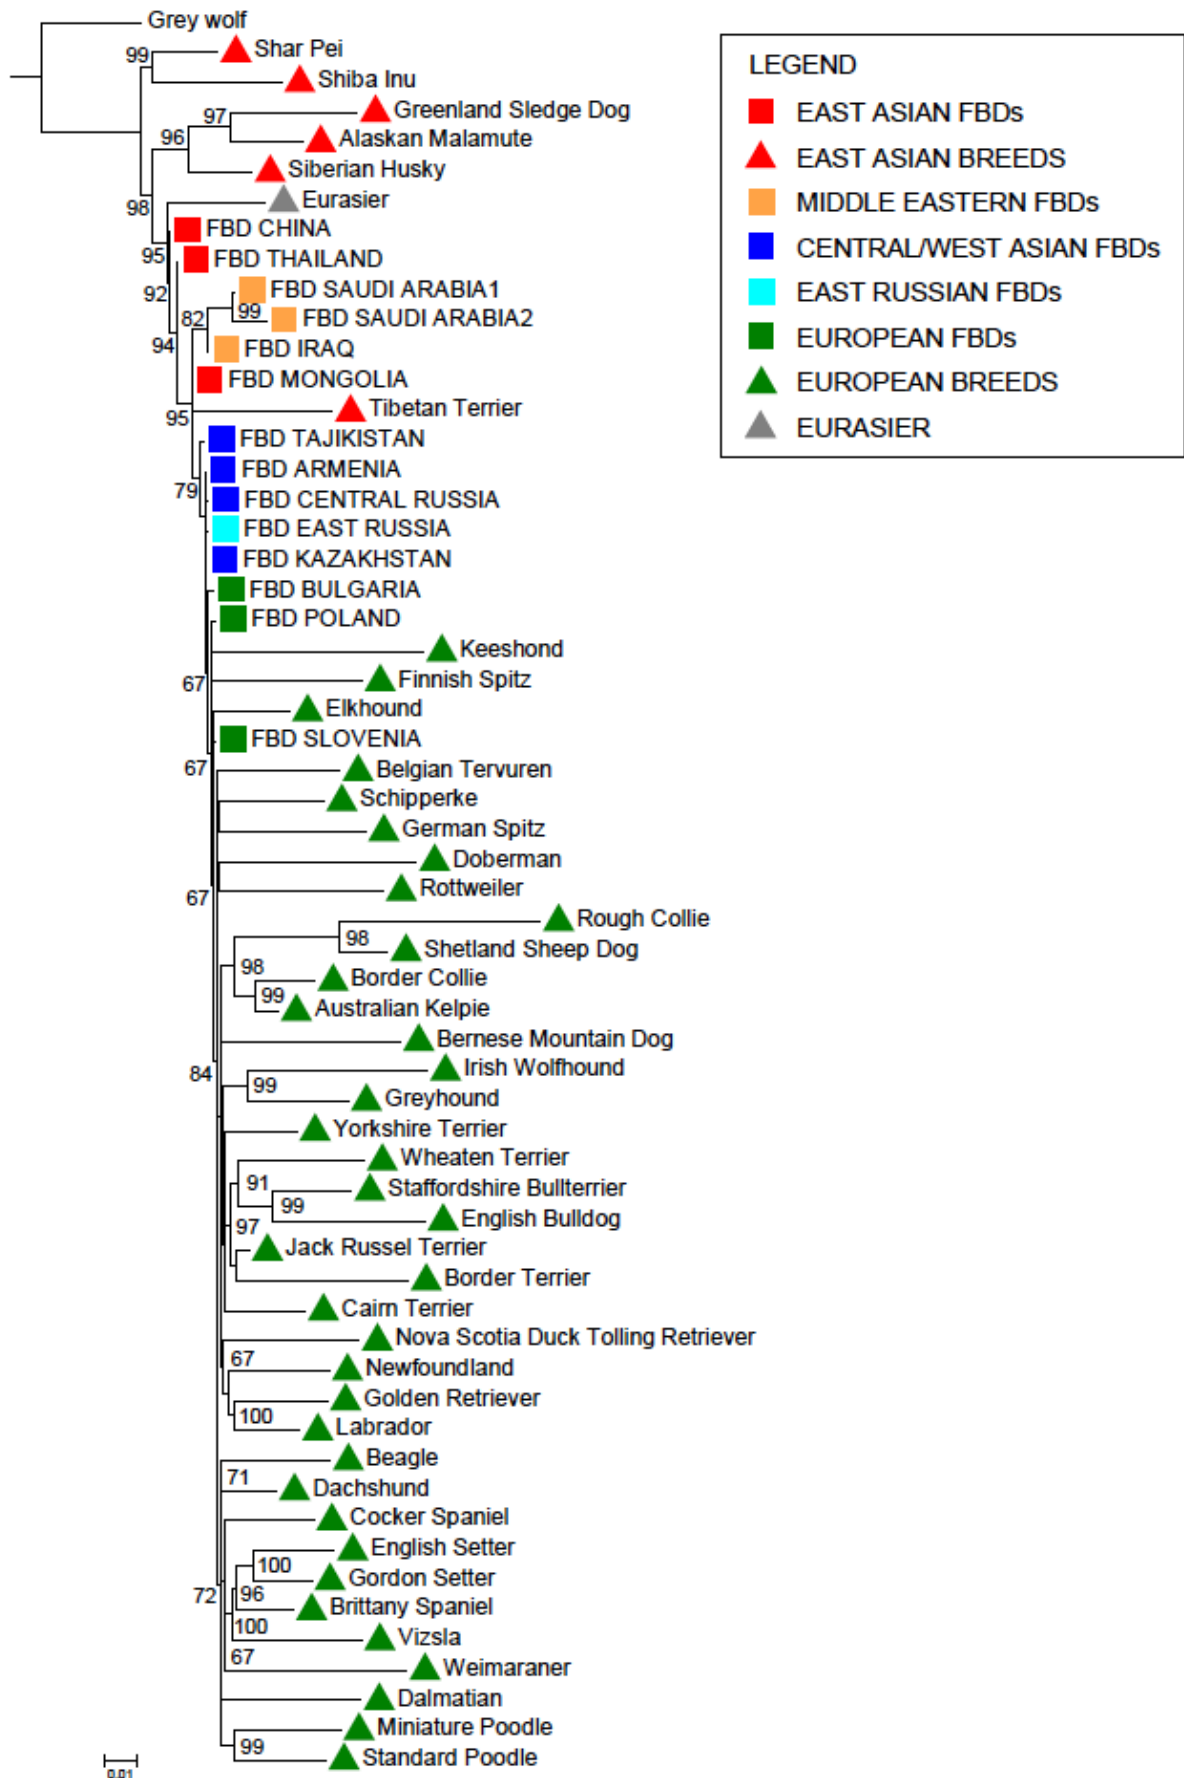

**Supplementary Figure 11. Maximum likelihood tree of genetic differentiation among FBDs and breed dogs, constructed in TREEMIX** without introducing the migration parameter, drawn using MEGA6 software. German shepherd was excluded from this analysis. This is the same tree as in Figure 1B in the main text, but showing the details of bootstrap support instead of presenting results of the RASP analysis.

Supplementary Figure 12

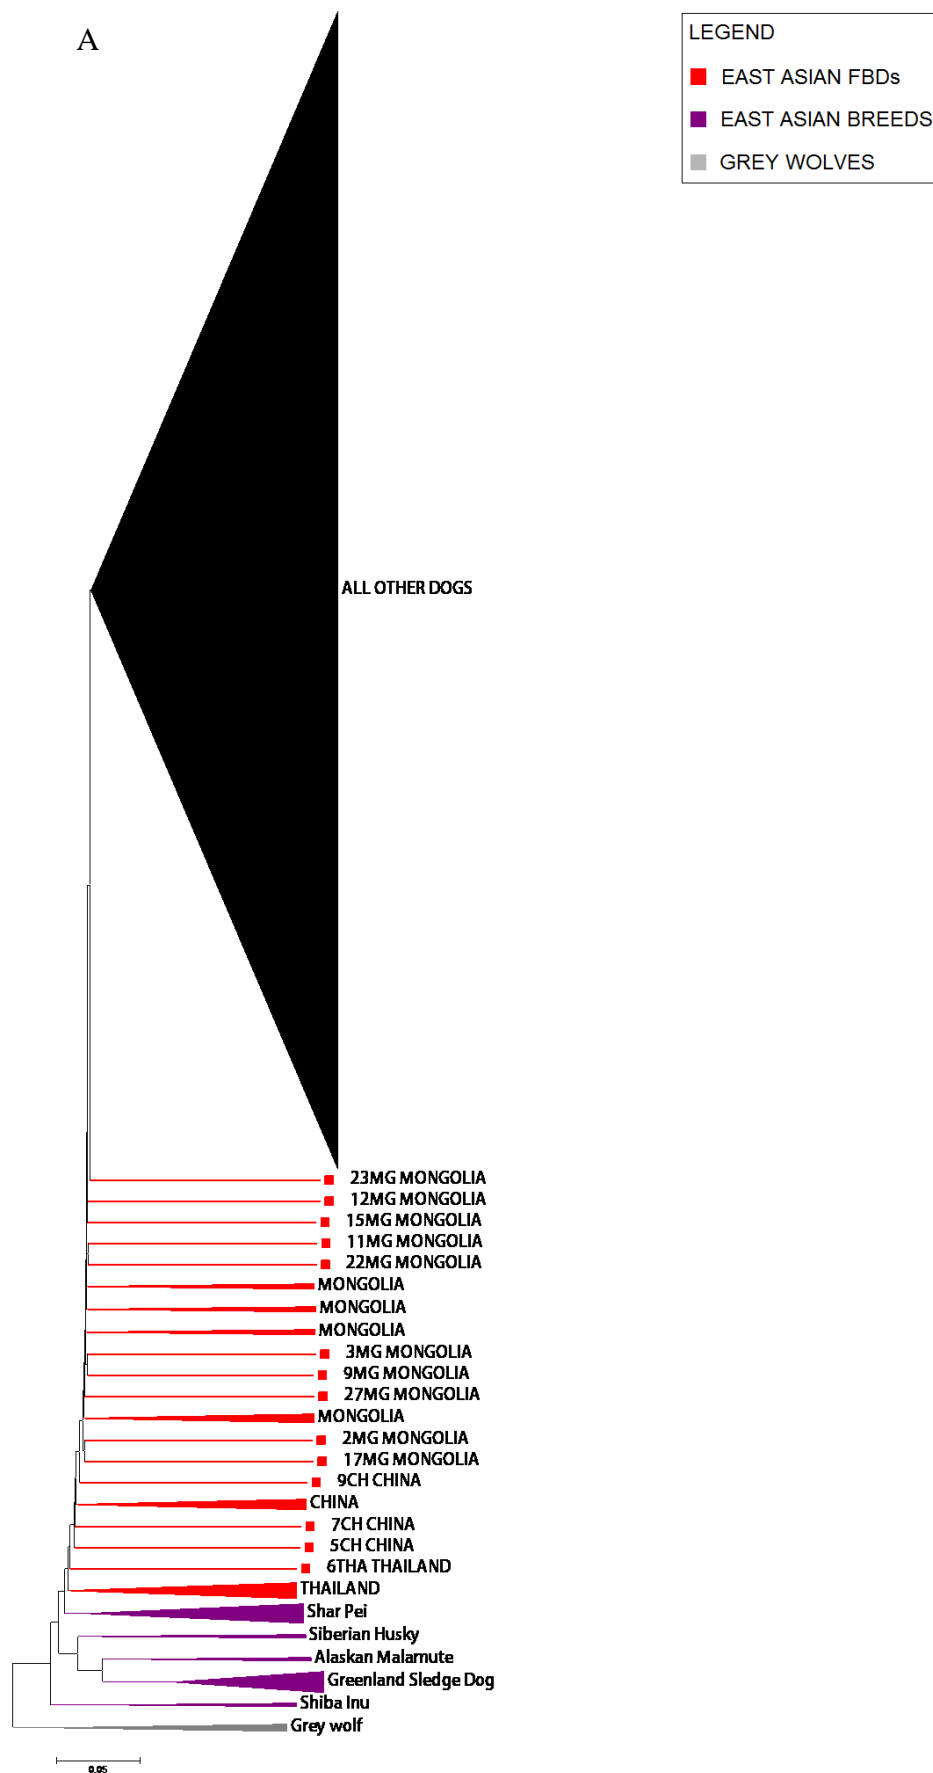

B

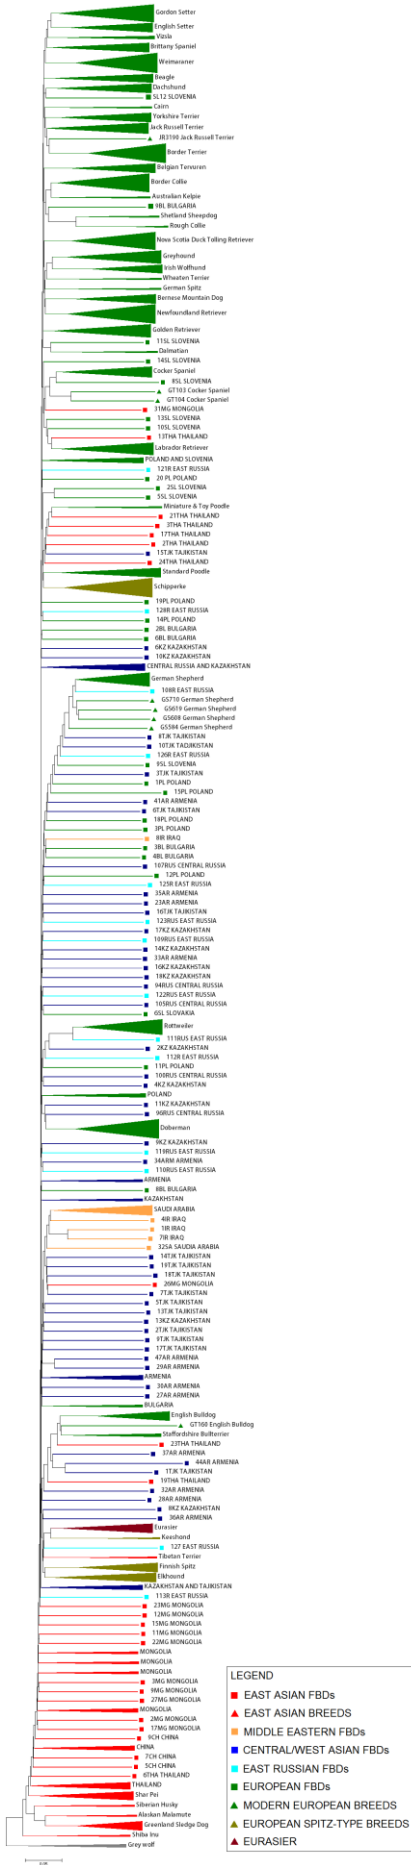

**Supplementary Figure 12. Tree of inter-individual IBS distances among free-breeding and pure-breed dogs.** (A) Simplified tree with only individuals branching from basal nodes distinguished, while all the others are presented as one clade. Individuals from the same geographic location or the same breed clustering together are represented as triangles. (B) A tree showing details of this large clade, which is also presented in a separate file due to its large size. Breeds of different origin are distinguished with colours.

# Supplementary Figure 13

A

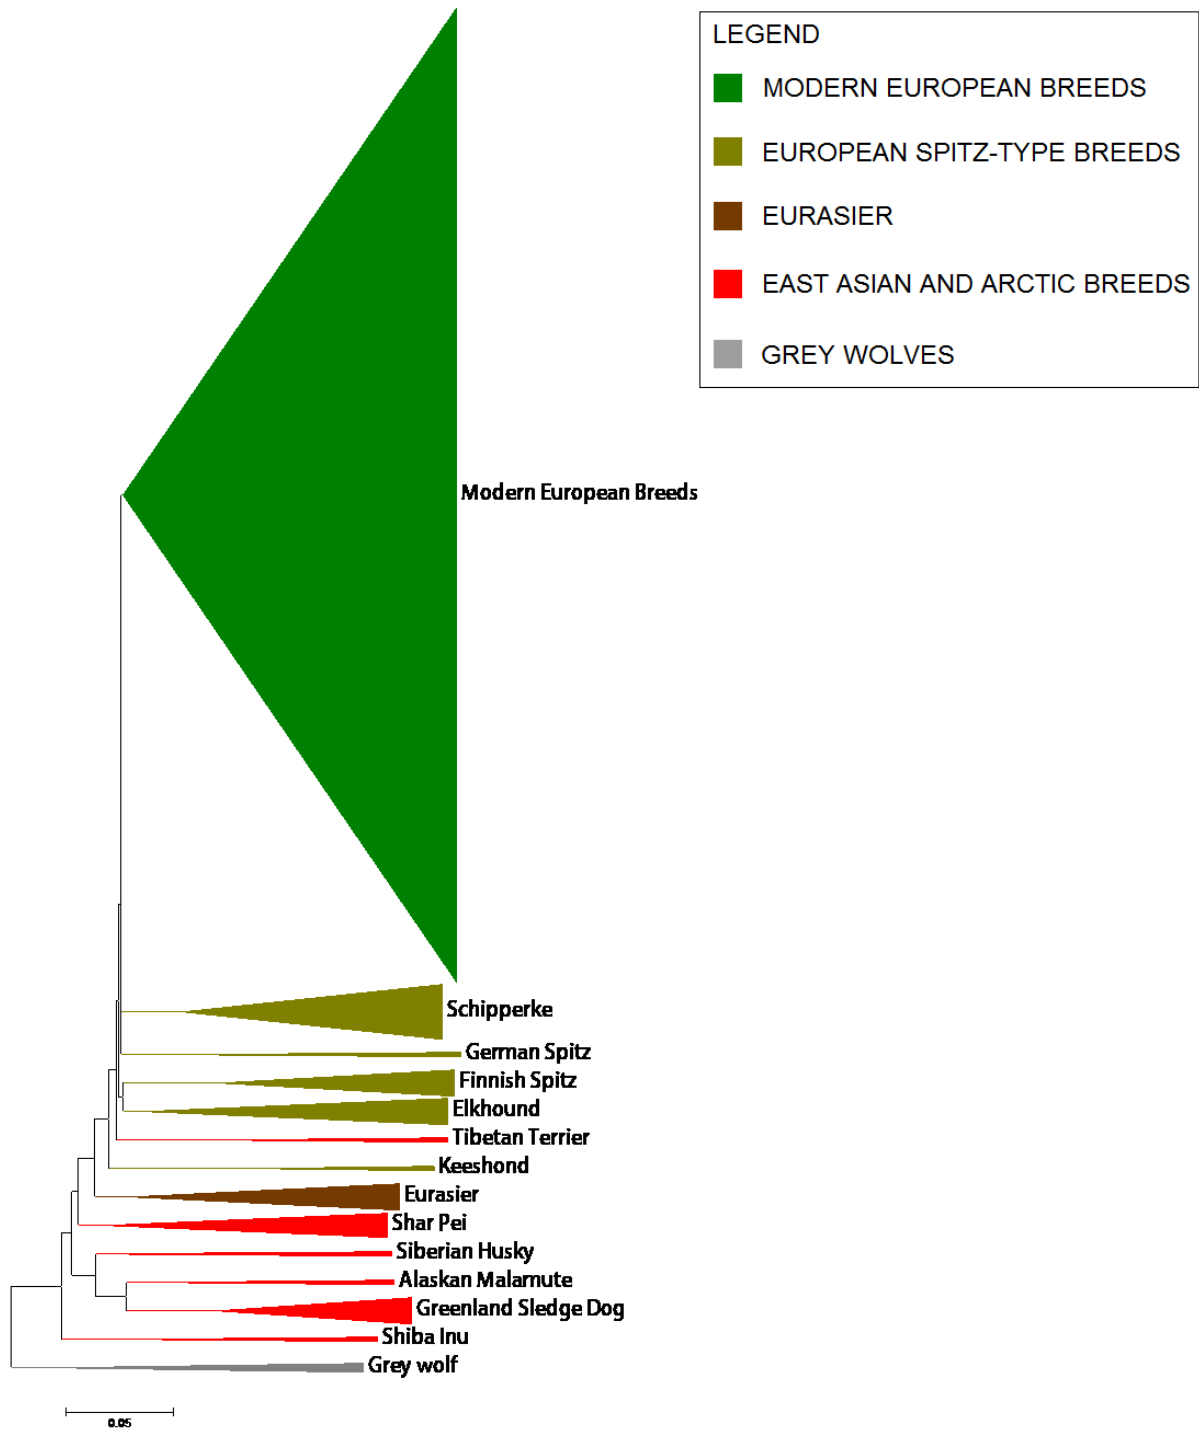

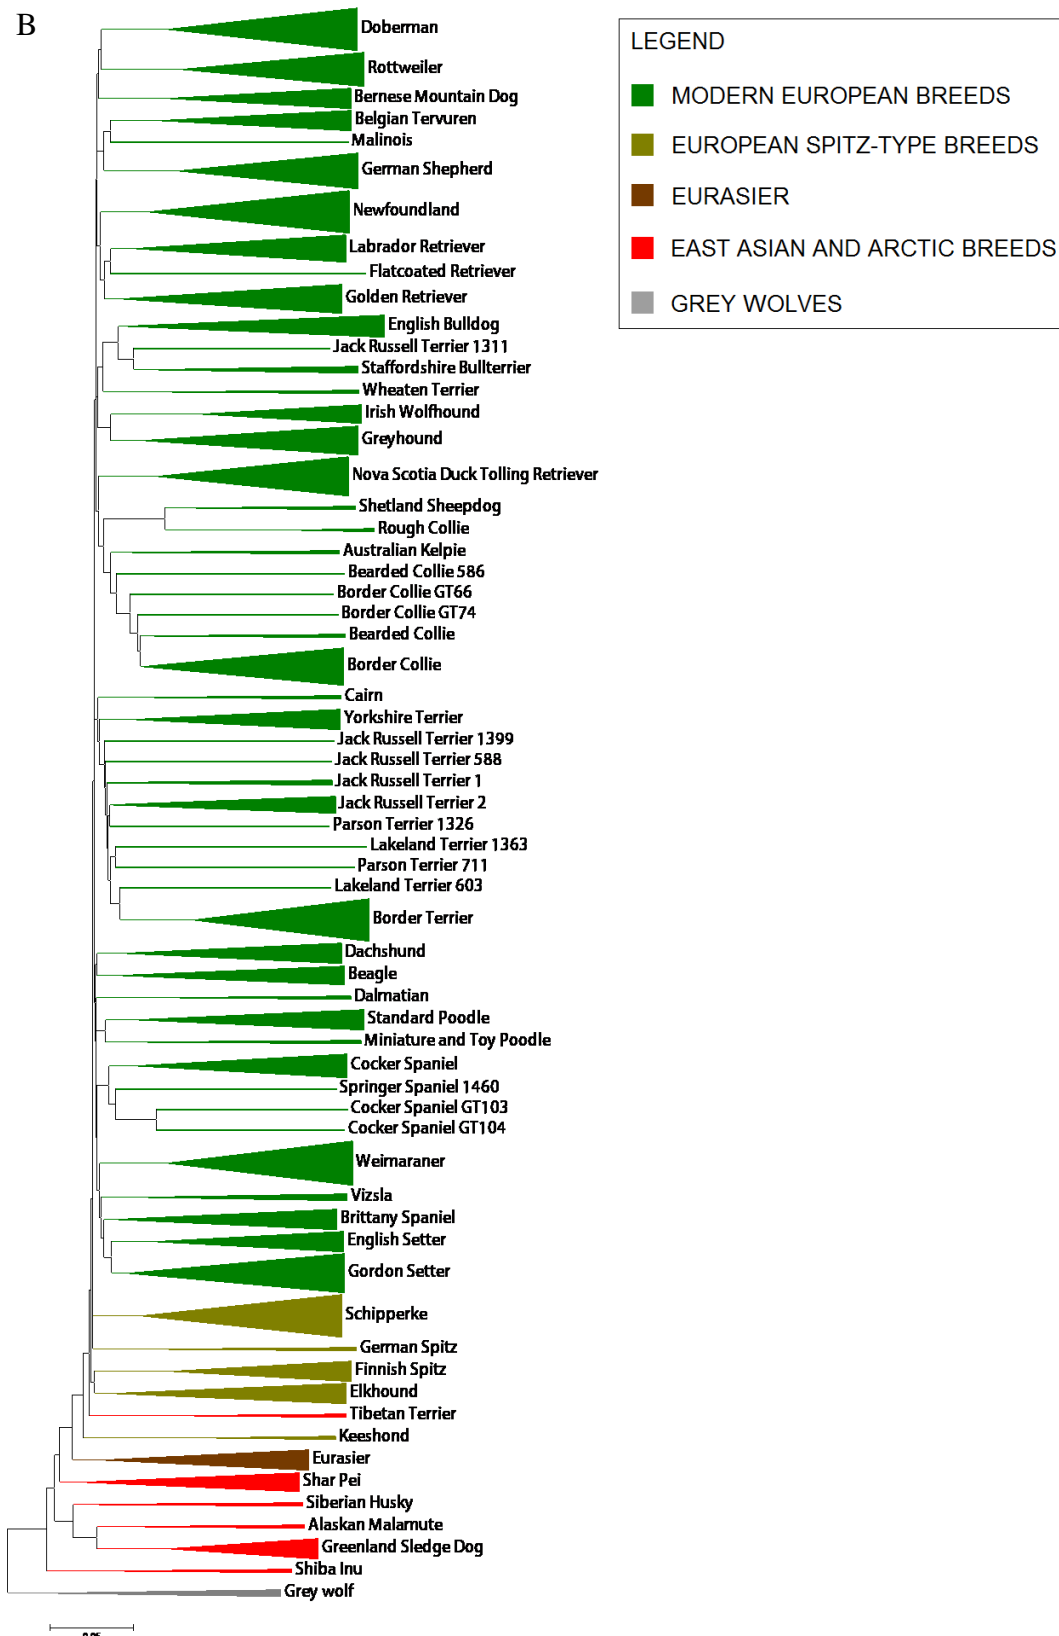

**Supplementary Figure 13. Tree of IBS inter-individual distances among pure-breed dogs.** (A) Simplified tree distinguishing only breeds branching from basal nodes in the tree, while all other breeds (all of which are of European origin) are grouped into one cluster. (B) A tree showing details of this large clade, with individuals from the same breed clustering together represented as triangles. Breeds of different origin are distinguished with colours.

# Supplementary Figure 14

A

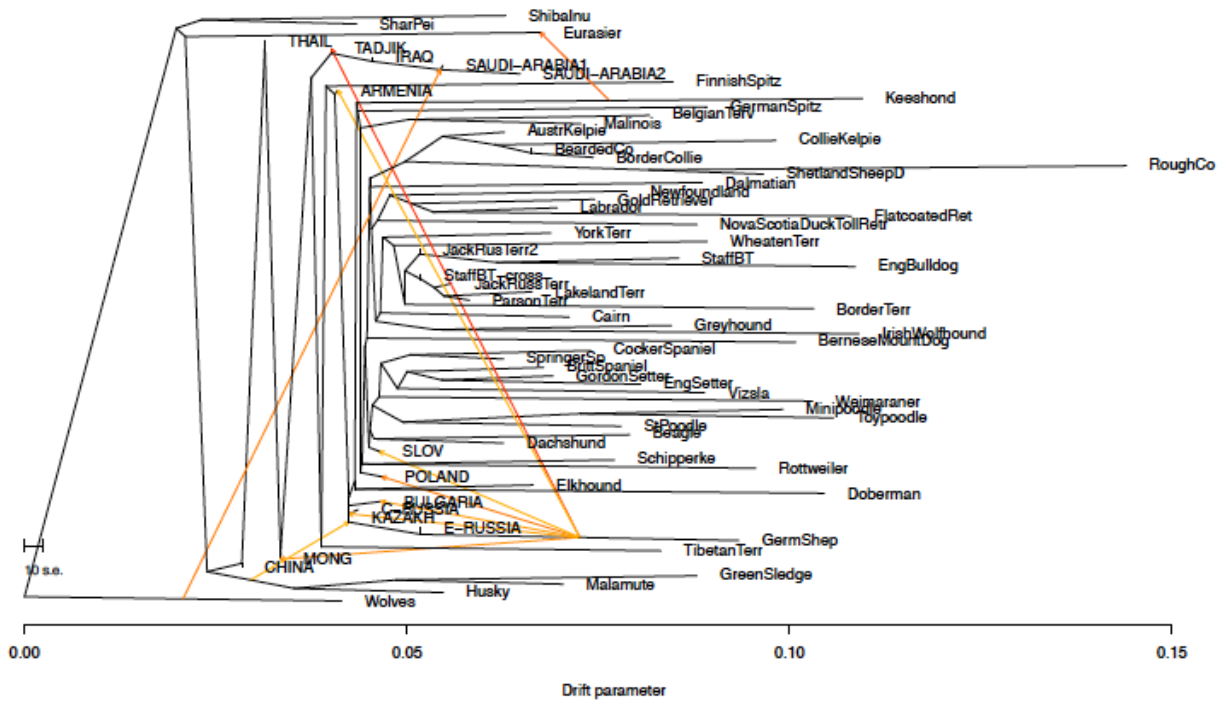

B

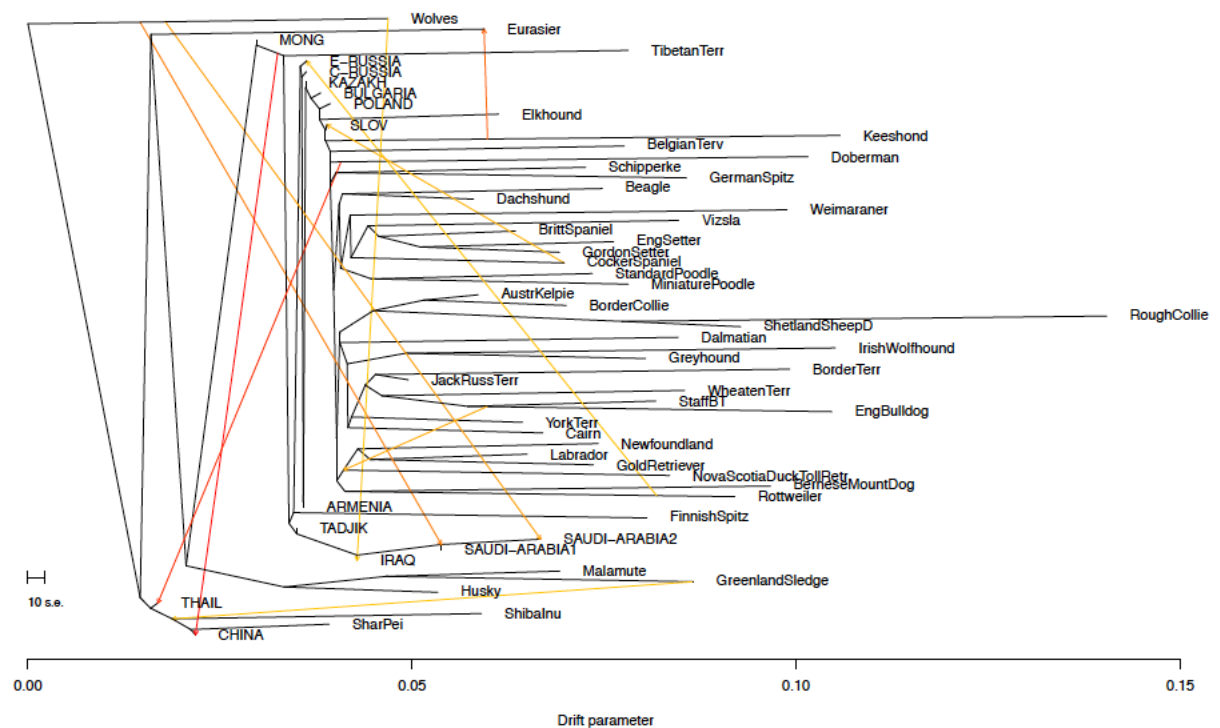



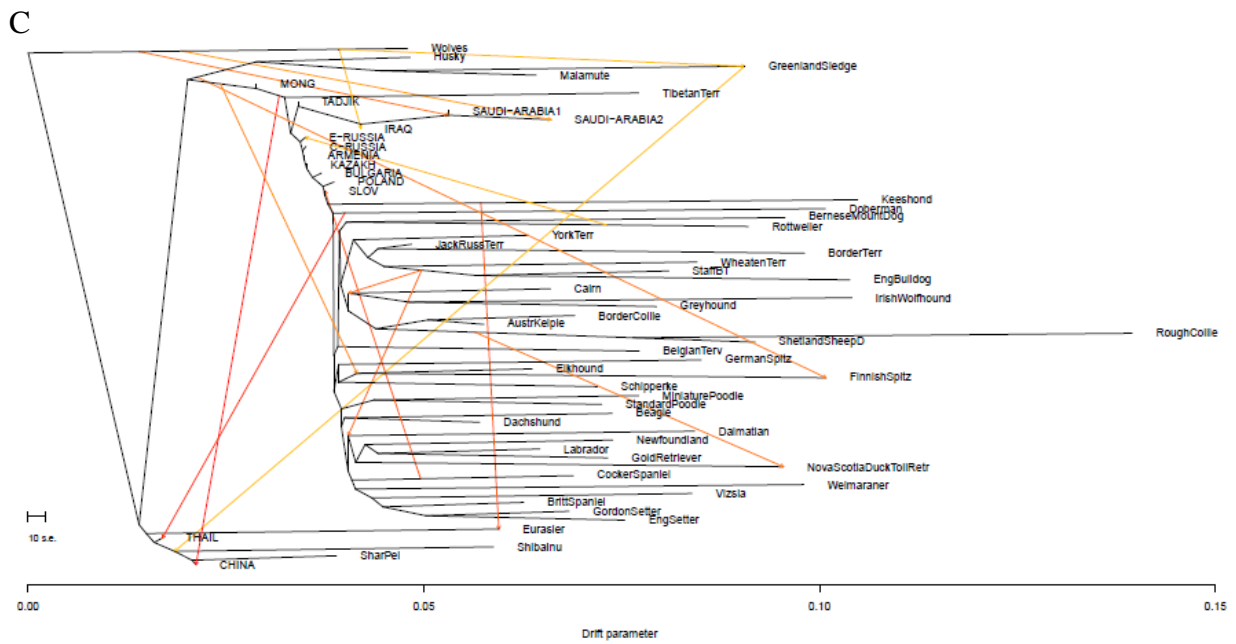

**Supplementary Figure 14. Maximum likelihood tree of genetic differentiation among FBDs and breed dogs, constructed in TREEMIX (A) assuming 10 events of post-divergence gene flow and including German shepherd, (B) assuming 10 events of post-divergence gene flow and without German shepherd, (C) assuming 15 events of post-divergence gene flow and without German shepherd. The colour of arrows represents gene flow intensity, increasing from light yellow to red. The figures were created using an R script distributed with TREEMIX software.**

Supplementary Figure 15

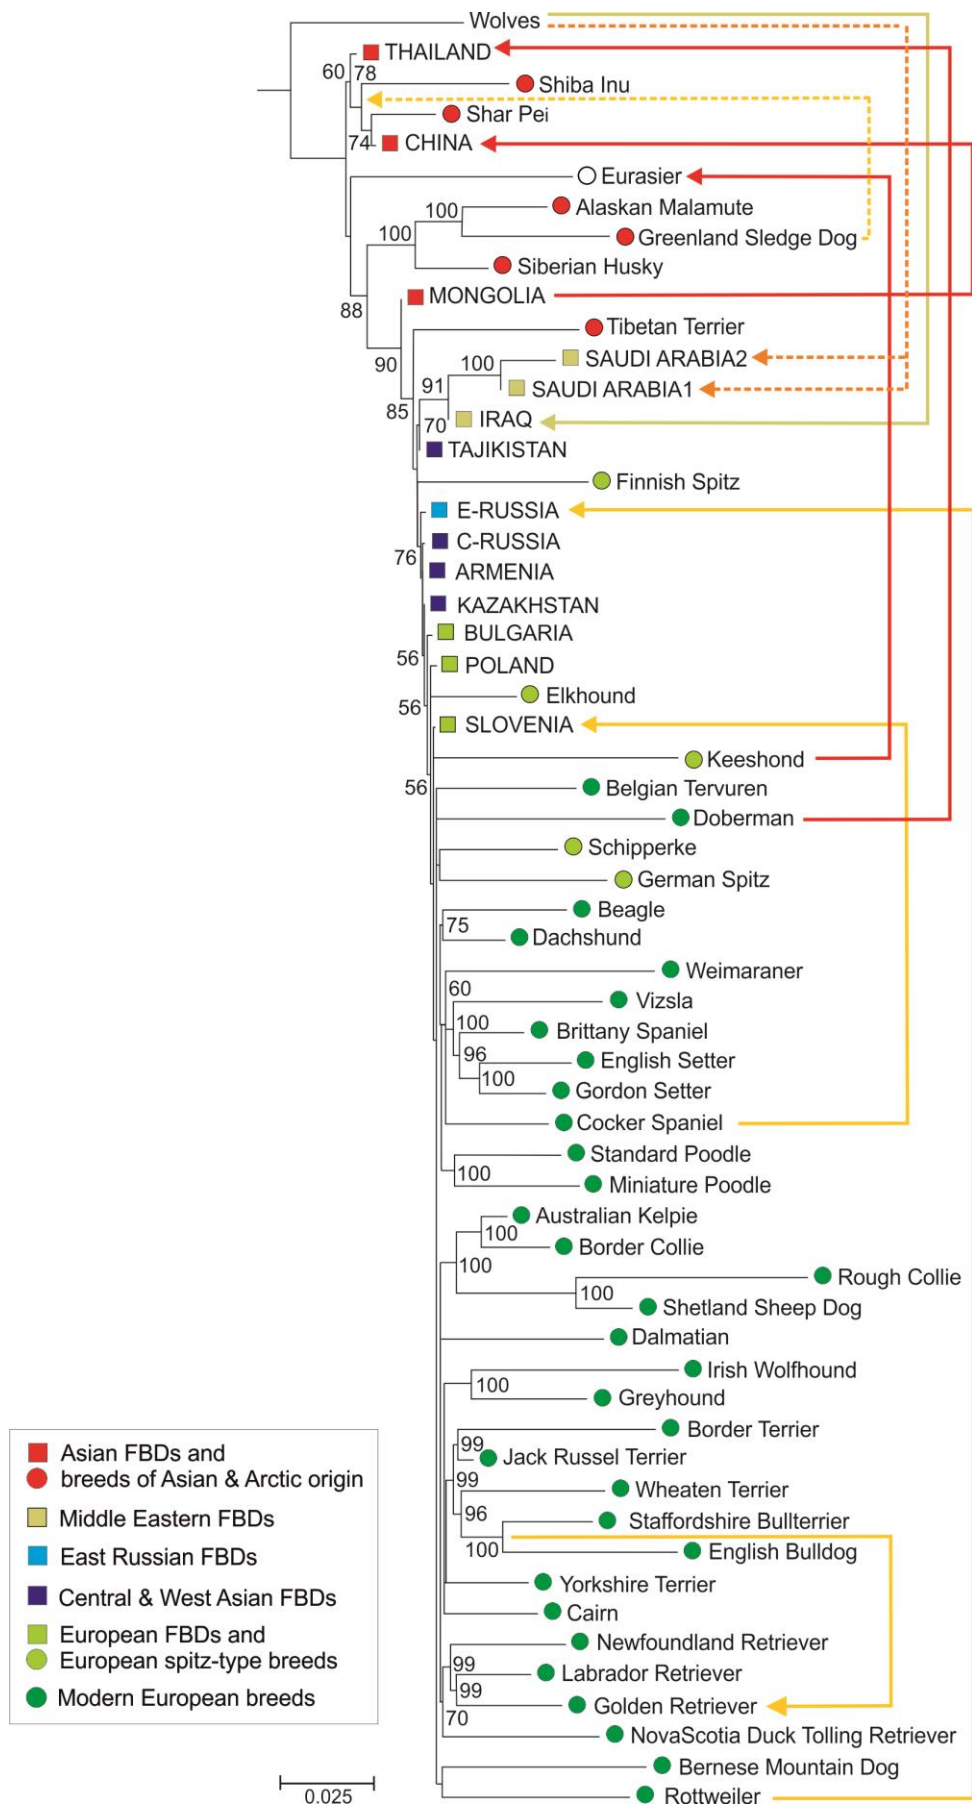

**Supplementary Figure 15. Maximum likelihood tree of genetic differentiation among FBDs and pure-breed dogs, constructed in TREEMIX, assuming 10 gene flow events.** The colours of arrows represent gene flow intensity, increasing from light yellow to red. P-values of all the inferred migration edges are below 0.0004. Bootstrap support for nodes is marked if above 50%. Bootstrap support for some groups of pure-breed dogs is not shown because of space constraints in the figure, but this information is non-essential for this study. Bootstrap support for the clade grouping Chinese and Thai FBDs, Shar Pei and Shiba Inu is relatively low, because in some replicates this clade also included Eurasier (a breed of mixed East Asian and European origin; trees representing bootstrap replicates are available upon request). Gene flow from wolves to Arctic dog breeds is only detected when 15 gene flow events are assumed (see Supplementary Fig. 14C).

# Supplementary Figure 16

A

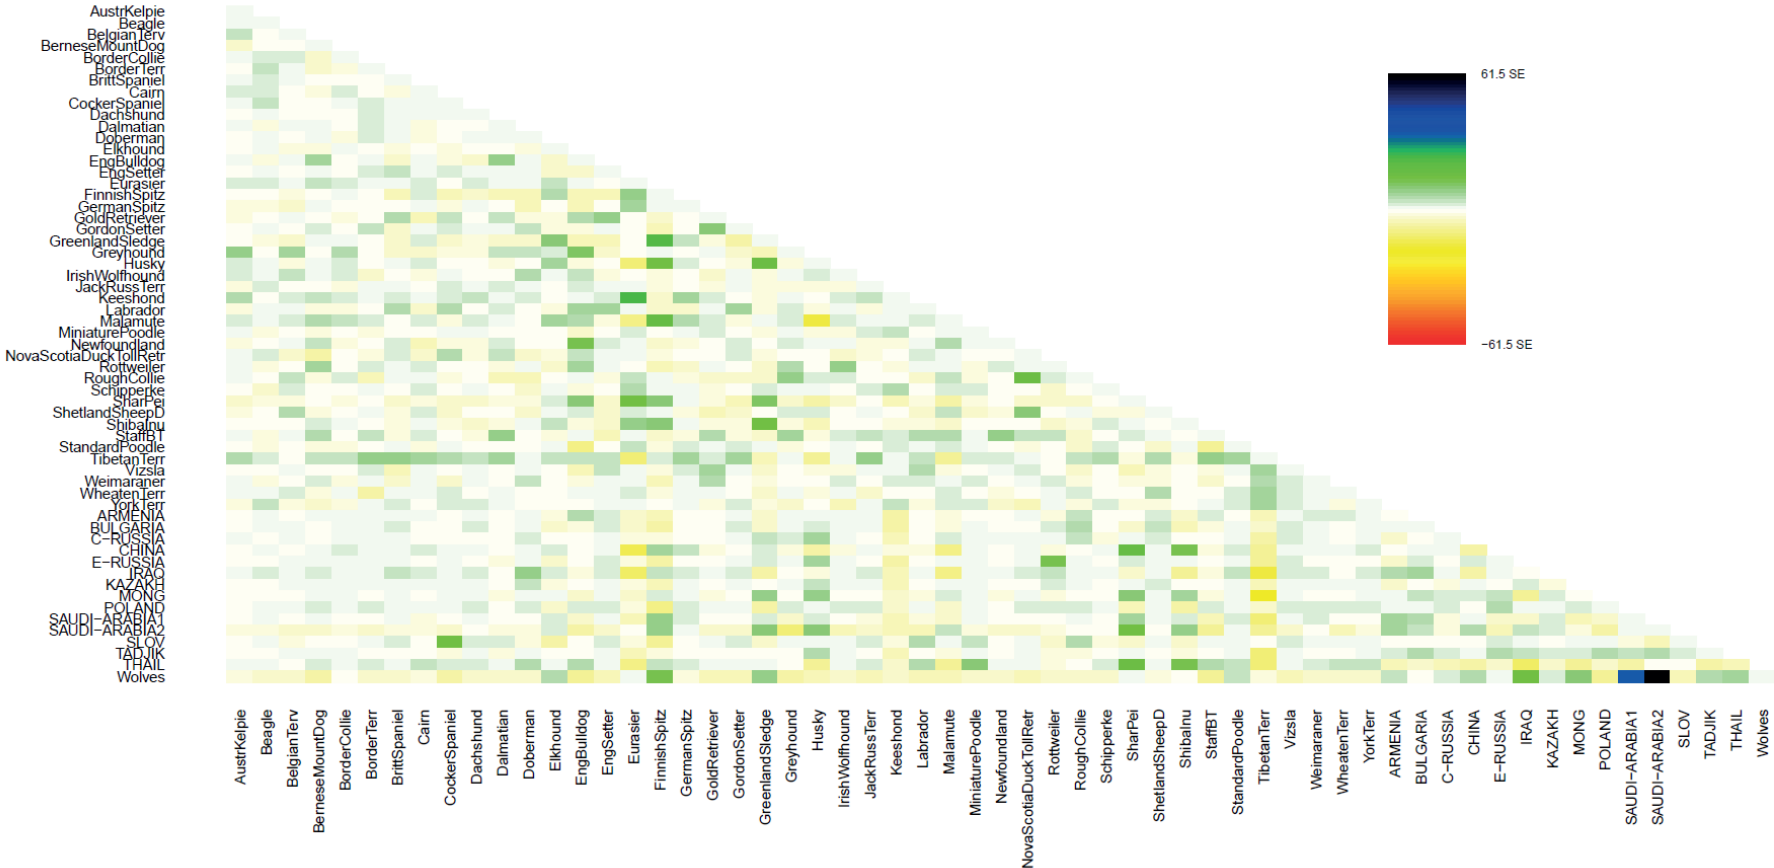

B

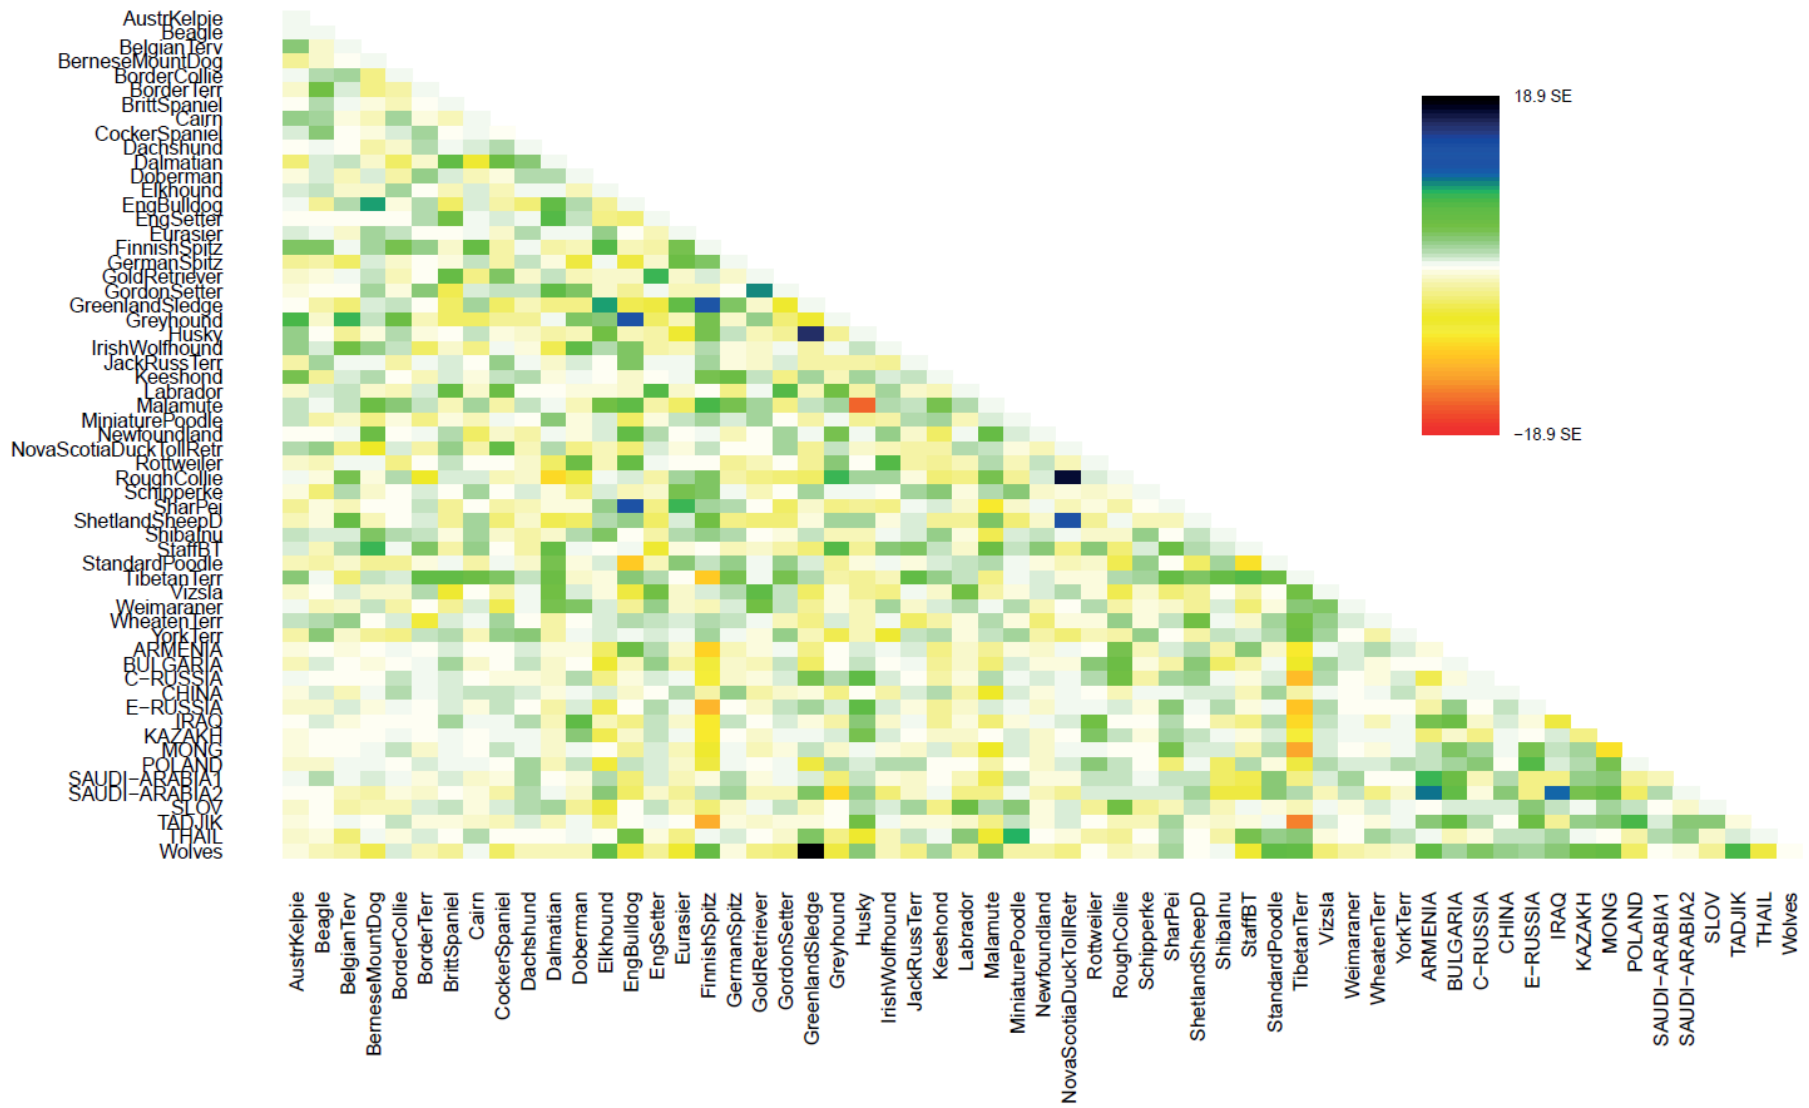

C

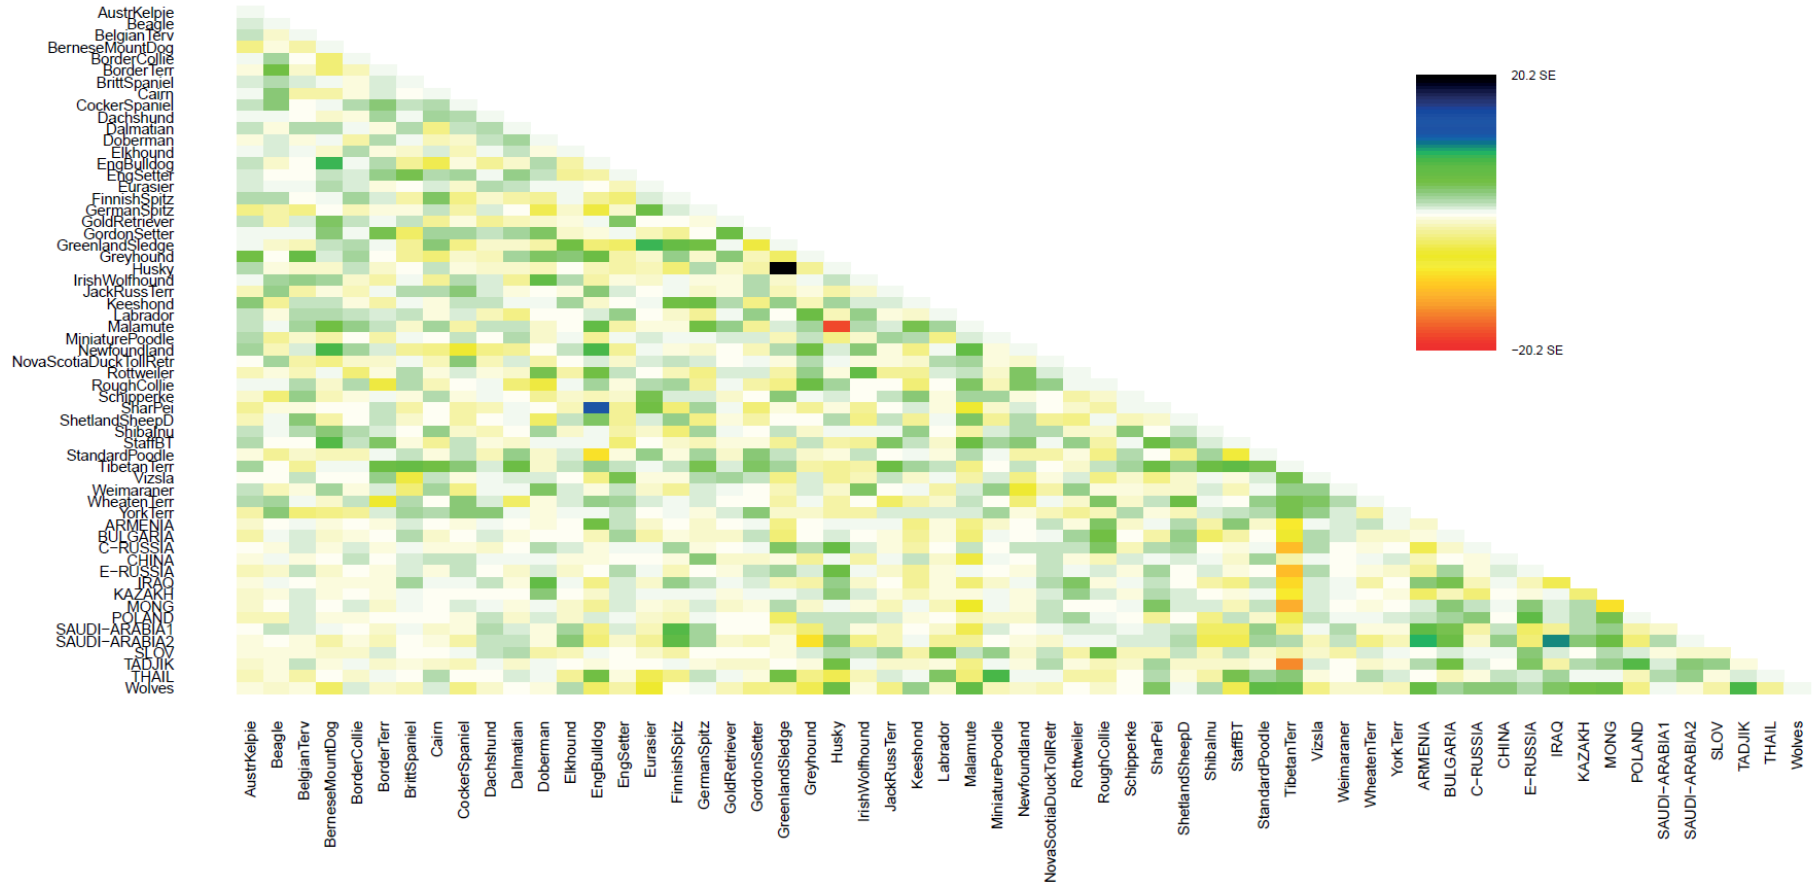

**Supplementary Figure 16. Plots of residual fit from the TREEMIX maximum likelihood trees: (A) without gene flow events, (B) with 10 gene flow events, (C) with 15 gene flow events.** These plots correspond to the TREEMIX trees from Supplementary Figure 11 and Supplementary Figure 14 B and C, respectively. Population pairs with residuals higher than zero are more closely related than it is represented in the tree, and therefore populations with high positive residuals are candidates for additional admixture events (Pickrell & Pritchard 2012). The breeds and FBD populations included in the plot are as follows: Australian Kelpie, Beagle, Belgian Tervuren, Bernese Mountain Dog, Border Collie, Border Terrier, Brittany Spaniel, Cairn, Cocker Spaniel, Dachshund, Dalmatian, Doberman, Elkhound, English Bulldog, English Setter, Eurasier, Finnish Spitz, German Spitz, Golden Retriever, Gordon Setter, Greenland Sledge Dog, Greyhound, Siberian Husky, Irish Wolfhound, Jack Russel Terrier, Keeshond, Labrador Retriever, Alaskan Malamute, Miniature Poodle, Newfoundland Retriever, Nova Scotia Duck Tolling Retriever, Rottweiler, Rough Collie, Schipperke, Shar Pei, Shetland Sheep Dog, Shiba Inu, Staffordshire Bull Terrier, Standard Poodle, Tibetan Terrier, Vizsla, Weimaraner, Wheaten Terrier, Yorkshire Terrier, FBD-Armenia, FBD-Bulgaria, FBD-Central Russia, FBD-China, FBD-East Russia, FBD-Iraq, FBD-Kazakhstan, FBD-Mongolia, FBD-Poland, FBD-Saudi Arabia 1, FBD-Saudi Arabia2, FBD-Slovenia, FBD-Tajikistan, FBD-Thailand, and grey wolves.

### Supplementary Figure 17

A1.  $DIC_{A1} = 1,817,414$

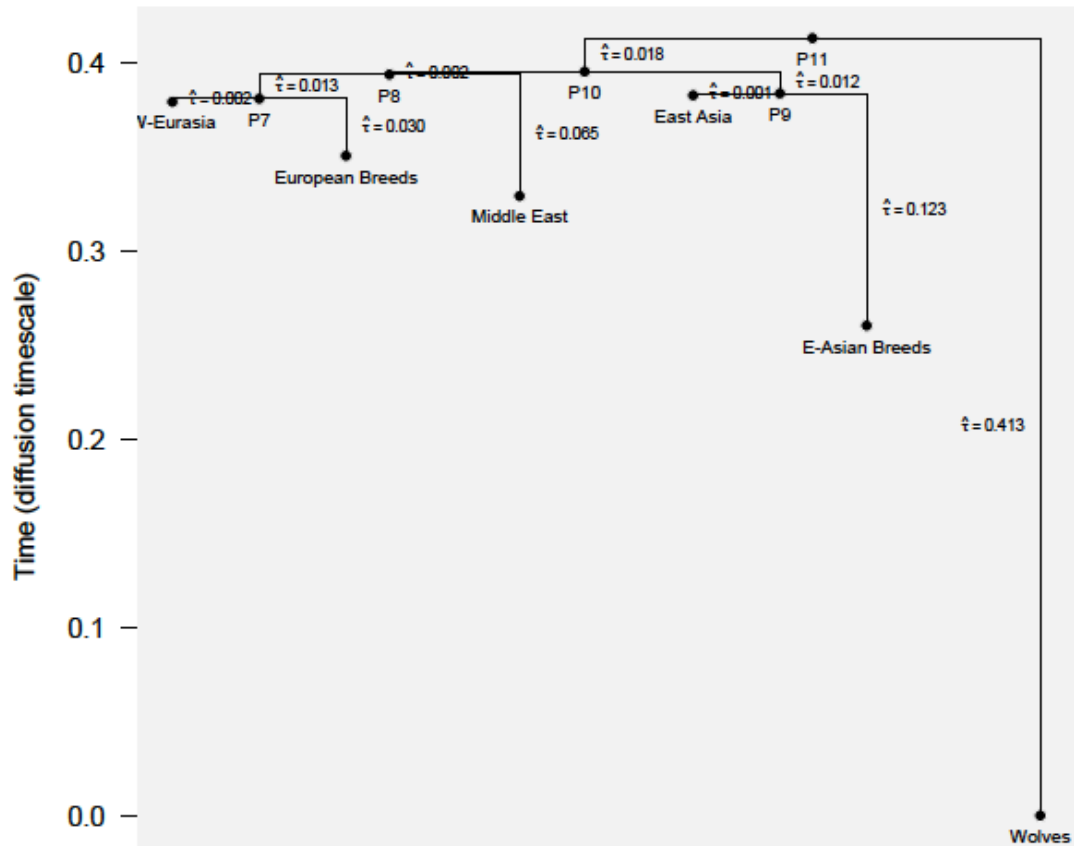

B1.  $DIC_{B1} = 1,818,596$ ;  $DIC_{B1} - DIC_{A1} = 1,183$

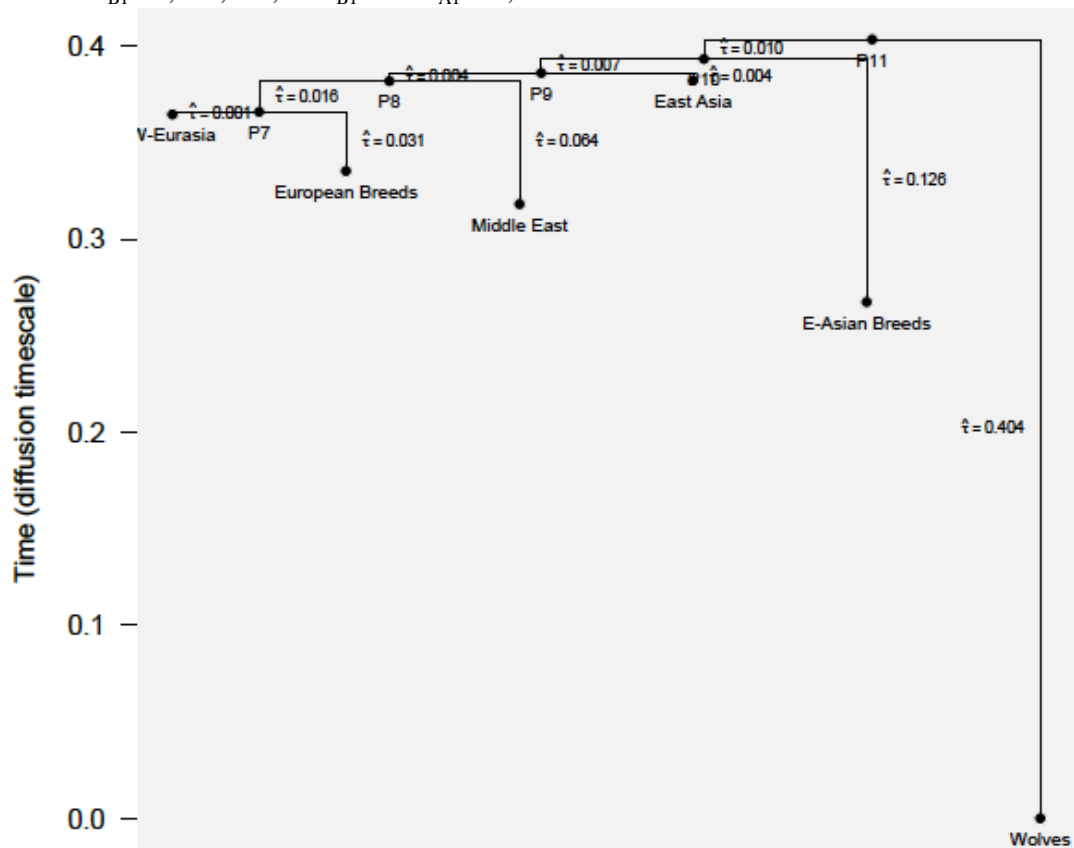



C1.  $DIC_{C1} = 1,822,605$ ;  $DIC_{C1} - DIC_{A1} = 5,191$

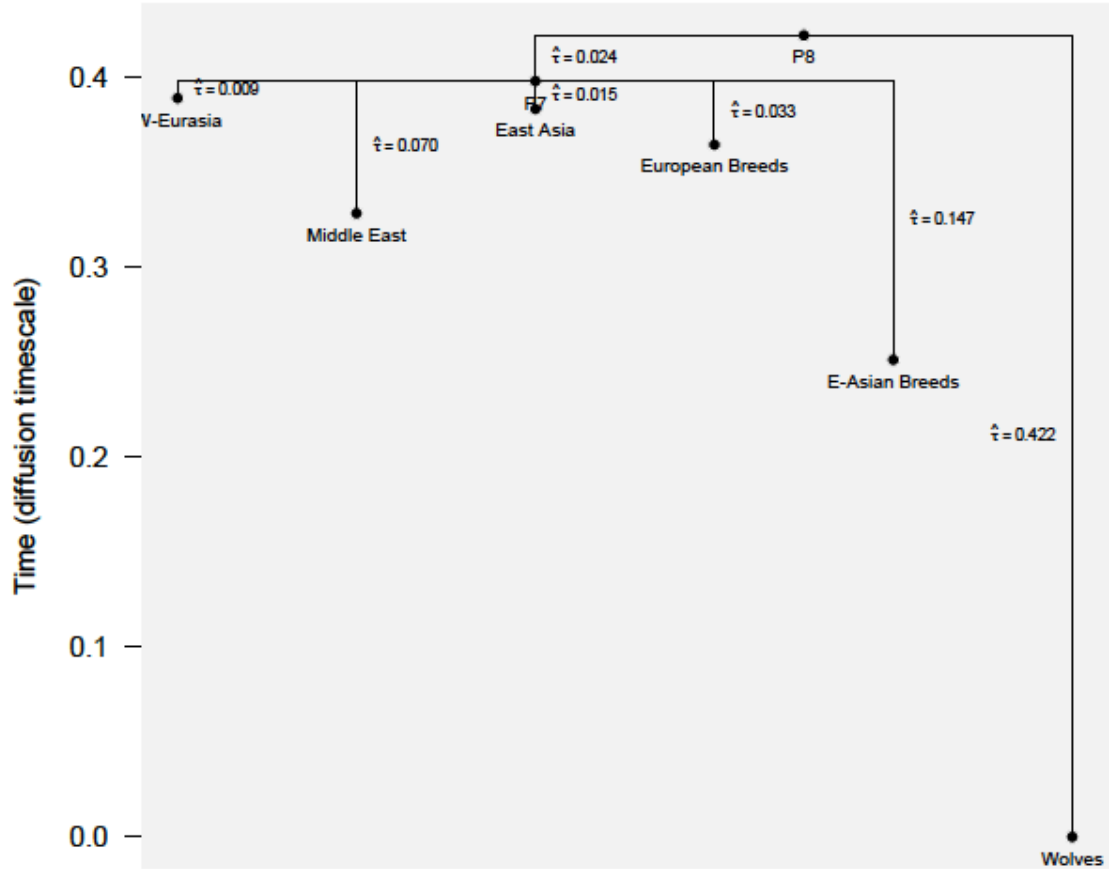

A2.  $DIC_{A2} = 1,824,530$

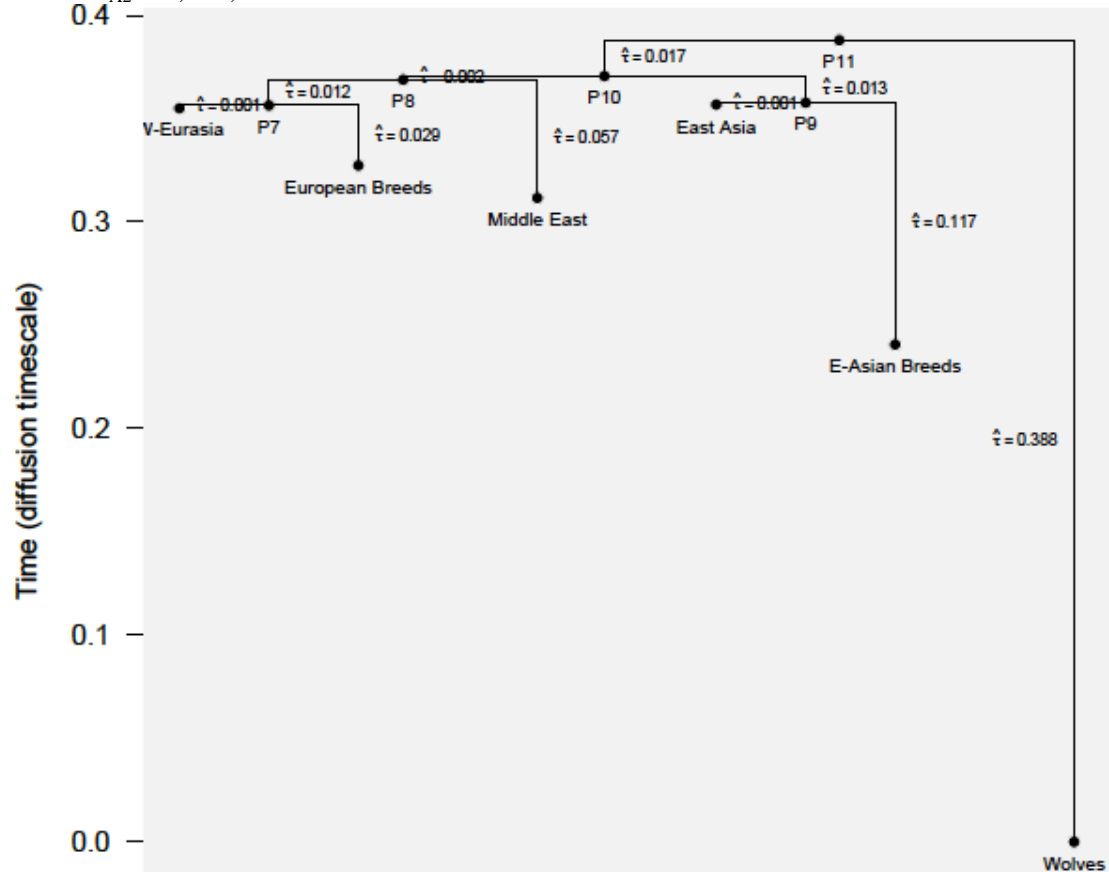

B2.  $DIC_{B2} = 1,825,667$ ;  $DIC_{B2} - DIC_{A2} = 1,137$

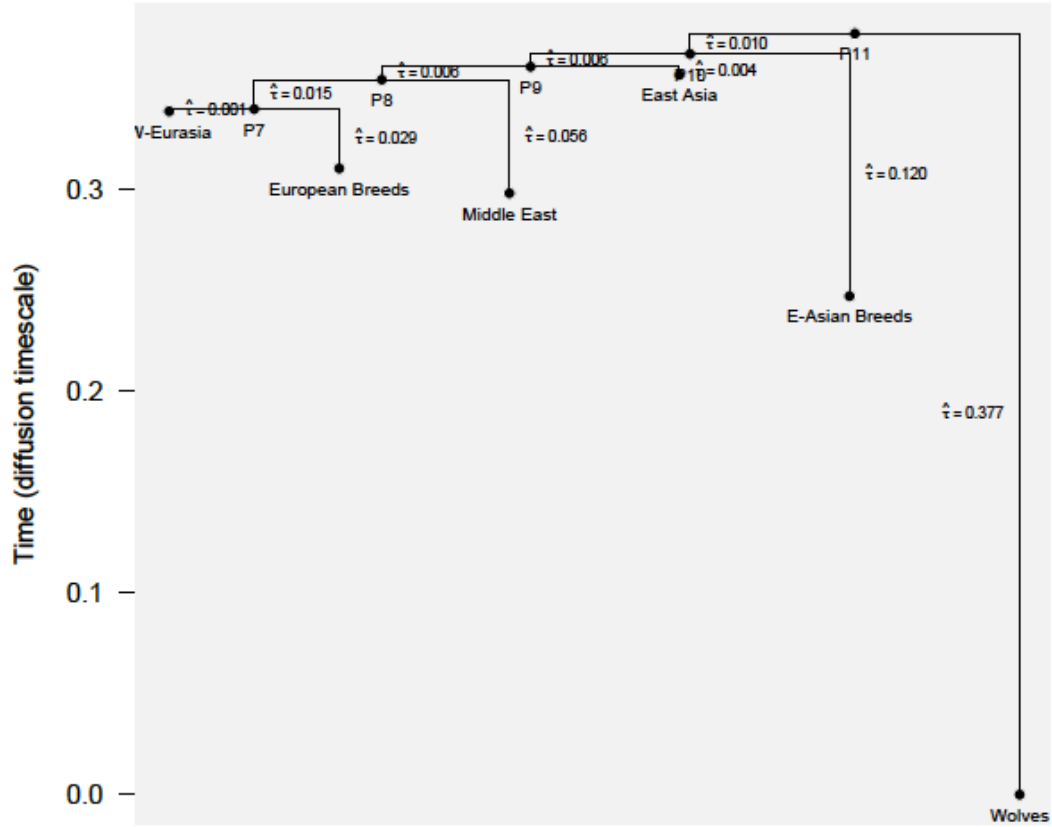

C1.  $DIC_{C2} = 1,830,211$ ;  $DIC_{C2} - DIC_{A2} = 5,681$

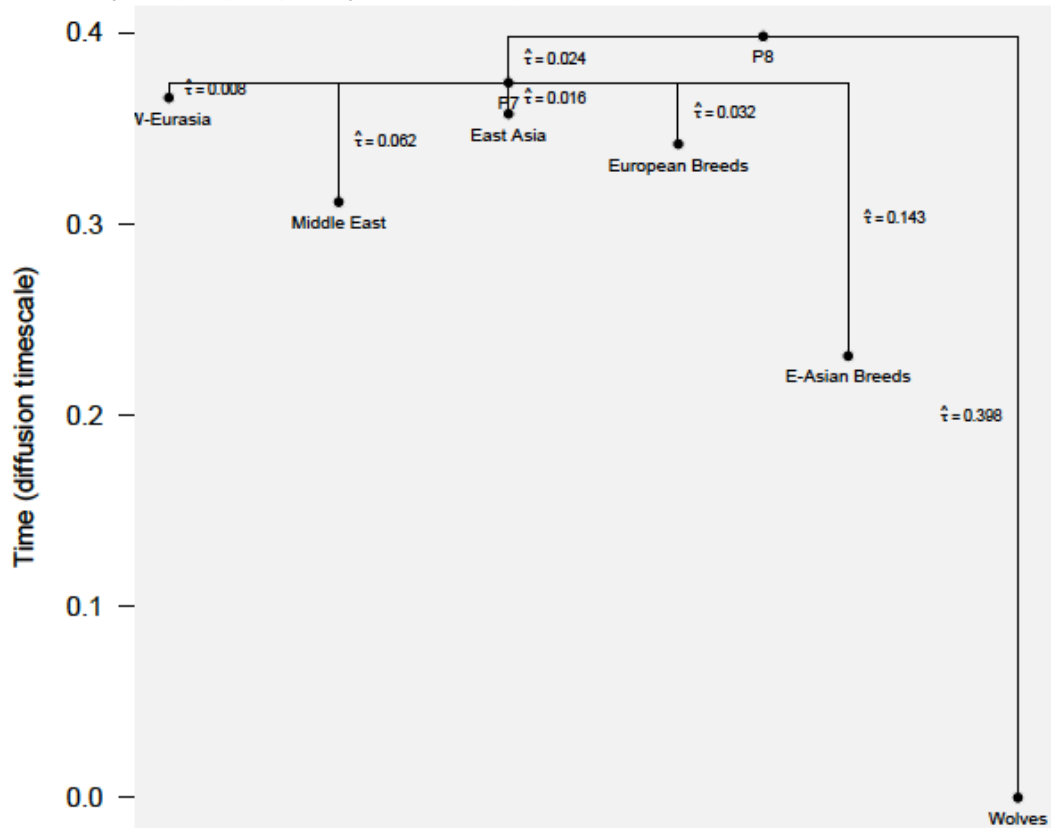

W-Eurasia: FBDs from Europe and West/Central Asia, Middle East: FBDs from the Middle East, East Asia: FBDs from East Asia, E-Asian Breeds: dog breeds originating from East Asia.

**Supplementary Figure 17. Tree topologies inferred in KIMTREE, based on two sets of SNPs originating from the equal division of the original SNP set (made due to computational issues).** Pairs of trees (A1 and A2), (B1 and B2), (C1 and C2) represent three different topologies analysed for two sets of SNPs. Trees (A1) and (A2) represent the topology having the strongest support based on the DIC values. The branch lengths in these trees are estimated as  $\tau \approx T/(2N_E)$ , where  $N_E$  is the effective size of the population the branch leads to, and  $T$  is time (in generations). The estimated  $\tau$  values are provided for each branch. The most likely tree topology is identified using the deviance information criterion (DIC).

# Supplementary Figure 18

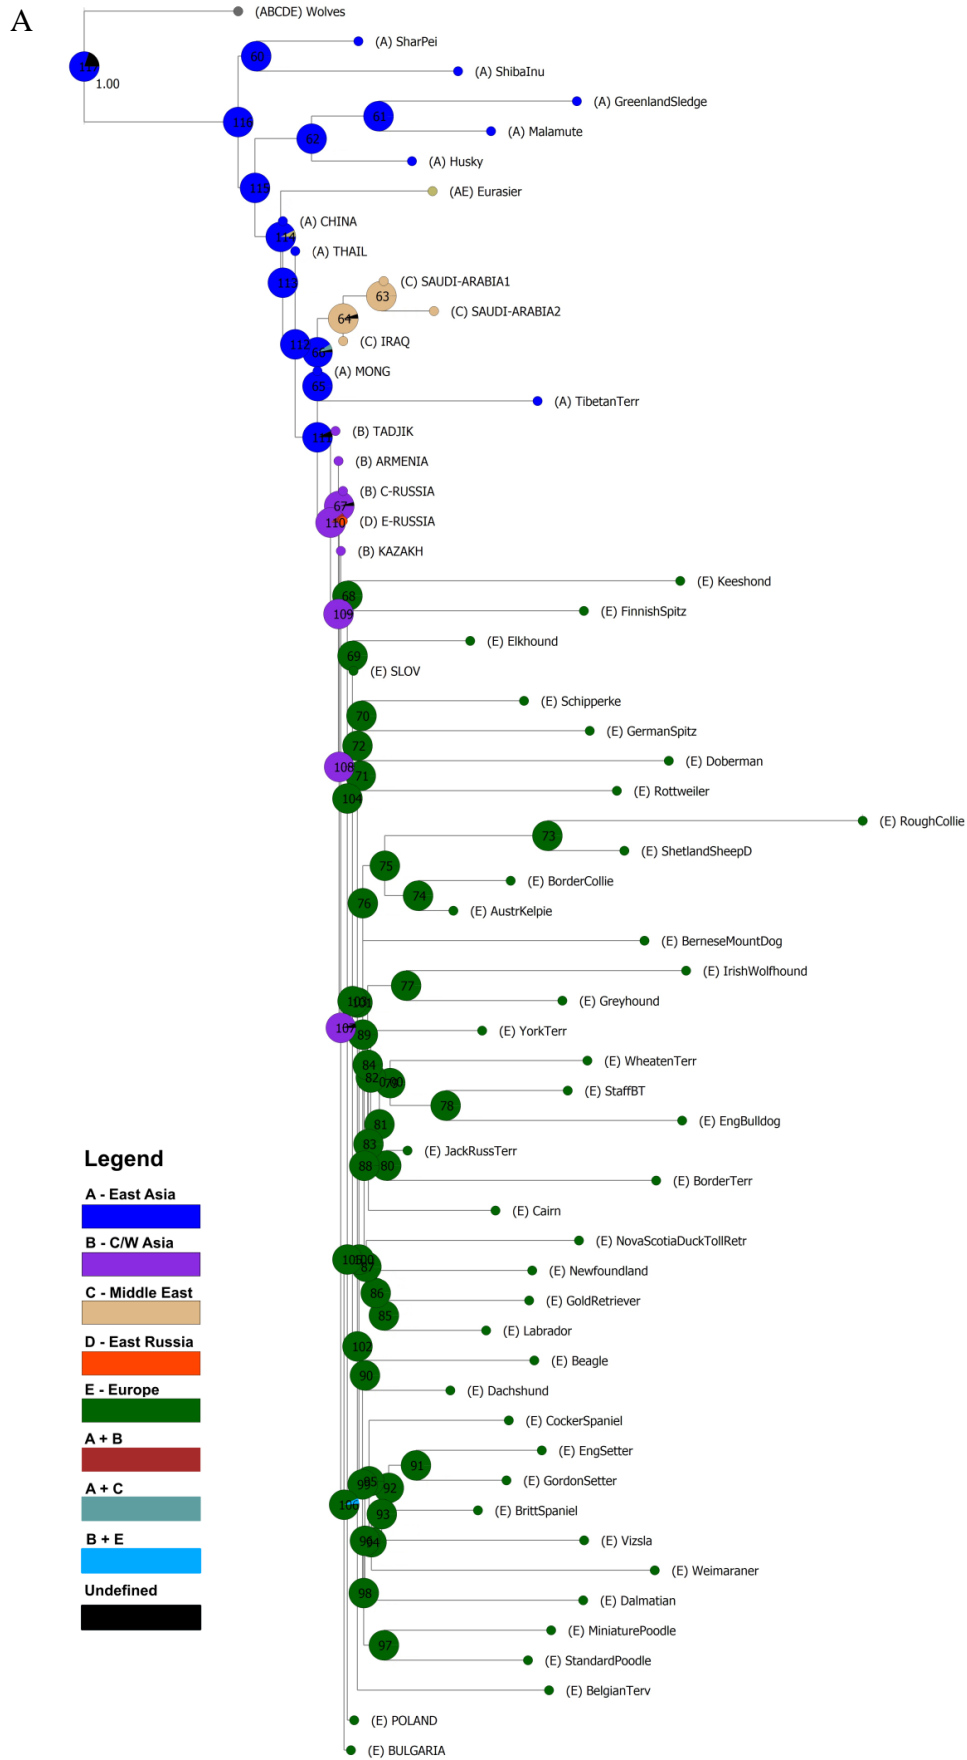

B

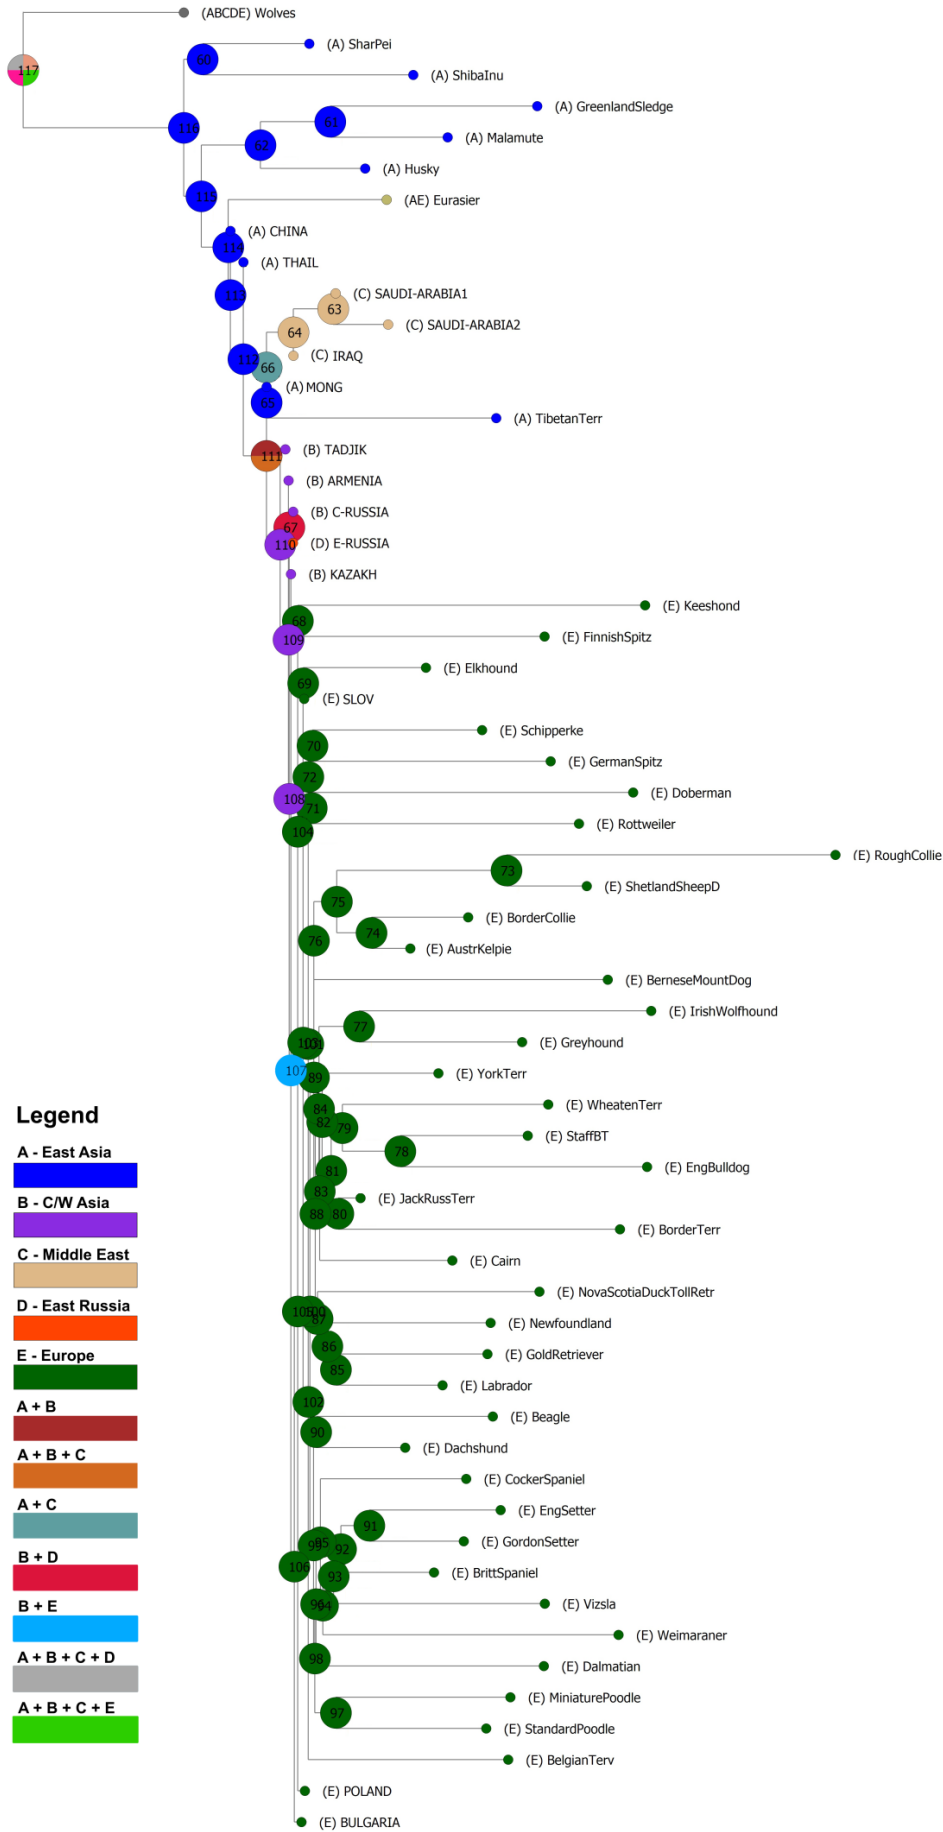

**Supplementary Figure 18. Biogeographic reconstruction of the distribution of ancestral dog populations inferred using the RASP software**, based on dog phylogeny created in TREEMIX assuming no post-divergence gene flow (A) with uncertainty assessed using Bayesian Binary MCMC method; this is the same tree as in Figure 1B, presented with more details; (B) with uncertainty assessed using S-Diva method. Distribution of ancestral dog populations is marked on nodes using colour-codes. Arctic breeds were assigned to East Asia, according to their primary origin (Brown *et al.* 2013, 2015, van Asch *et al.* 2013).

# Supplementary Figure 19

A

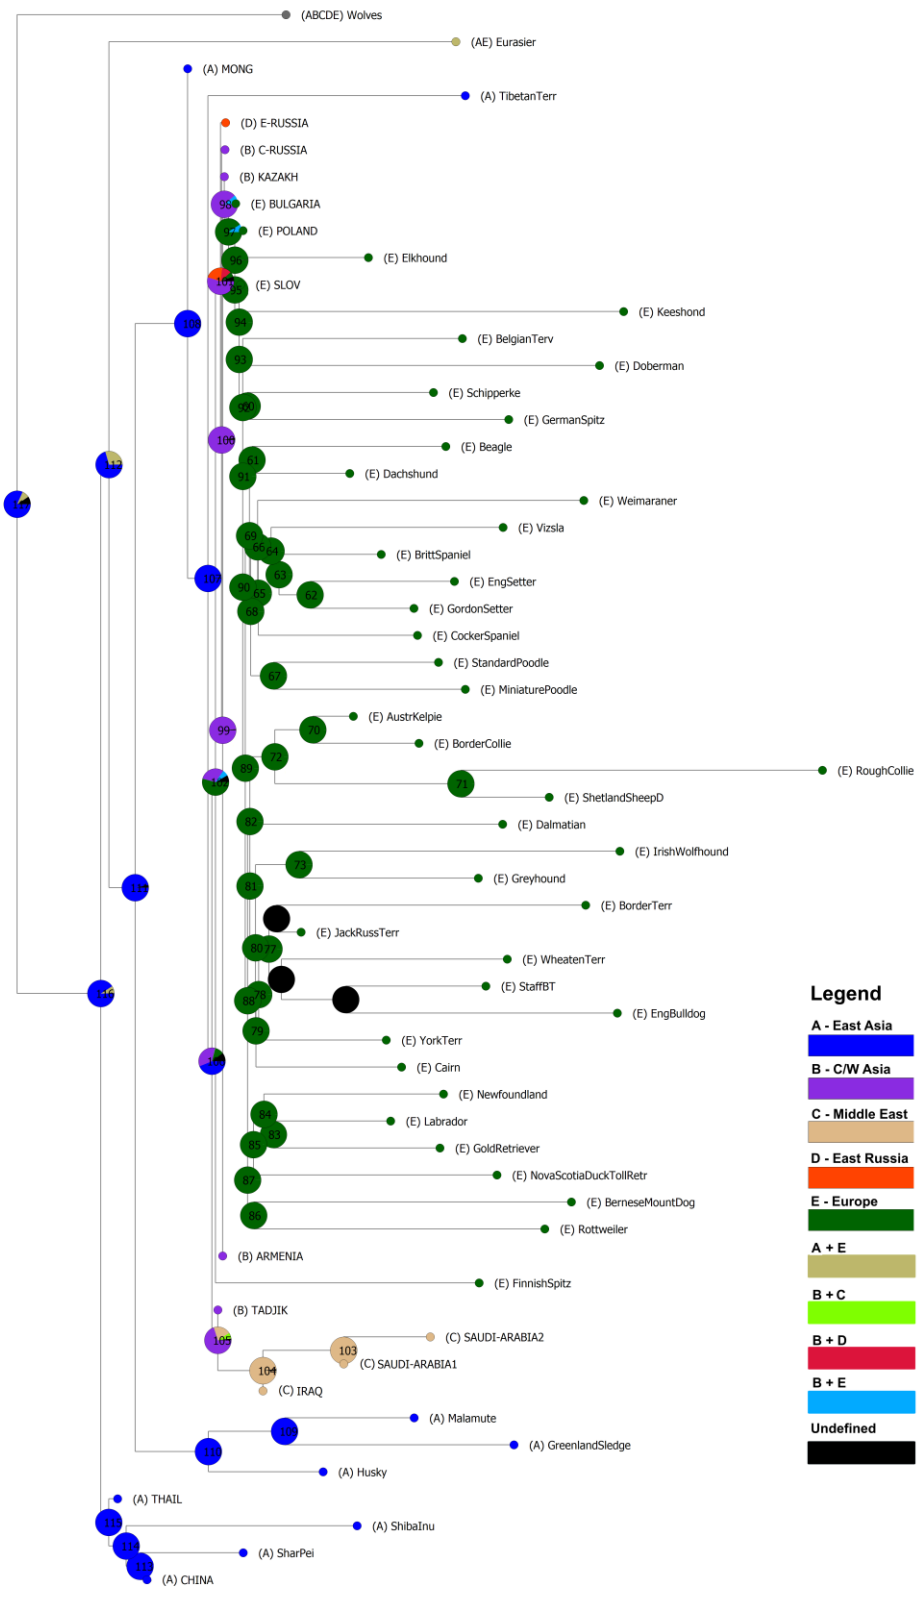

B

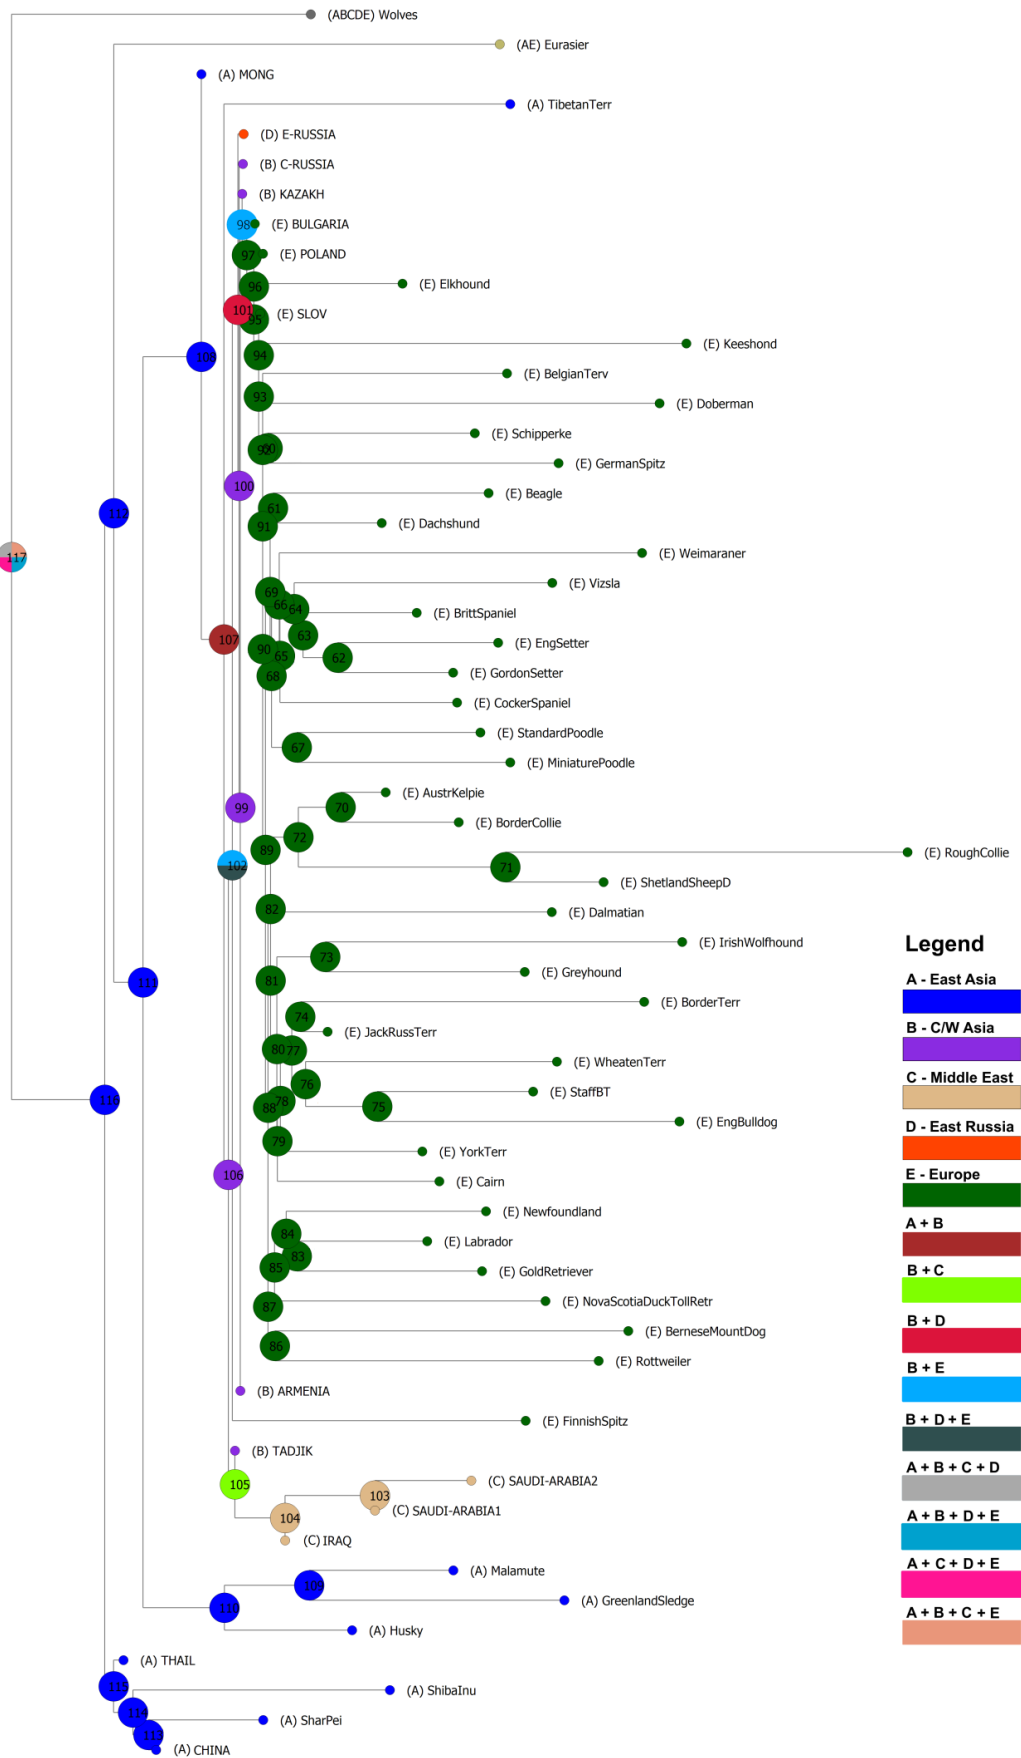



**Supplementary Figure 19. Biogeographic reconstruction of the distribution of ancestral dog populations inferred using the RASP software**, based on dog phylogeny created in TREEMIX assuming 10 events of gene flow (A) with uncertainty assessed using Bayesian Binary MCMC method, (B) with uncertainty assessed using S-Diva method. Distribution of ancestral dog populations is marked on nodes using colour-codes. Arctic breeds were assigned to East Asia, according to their primary origin (Brown *et al.* 2013, 2015, van Asch *et al.* 2013). The effect of the presence of a breed of admixed East Asian and European origin (Eurasier) is visible as an ambiguity of the geographical assignment of the respective node to either East Asia or Europe.

Supplementary Figure 20

A

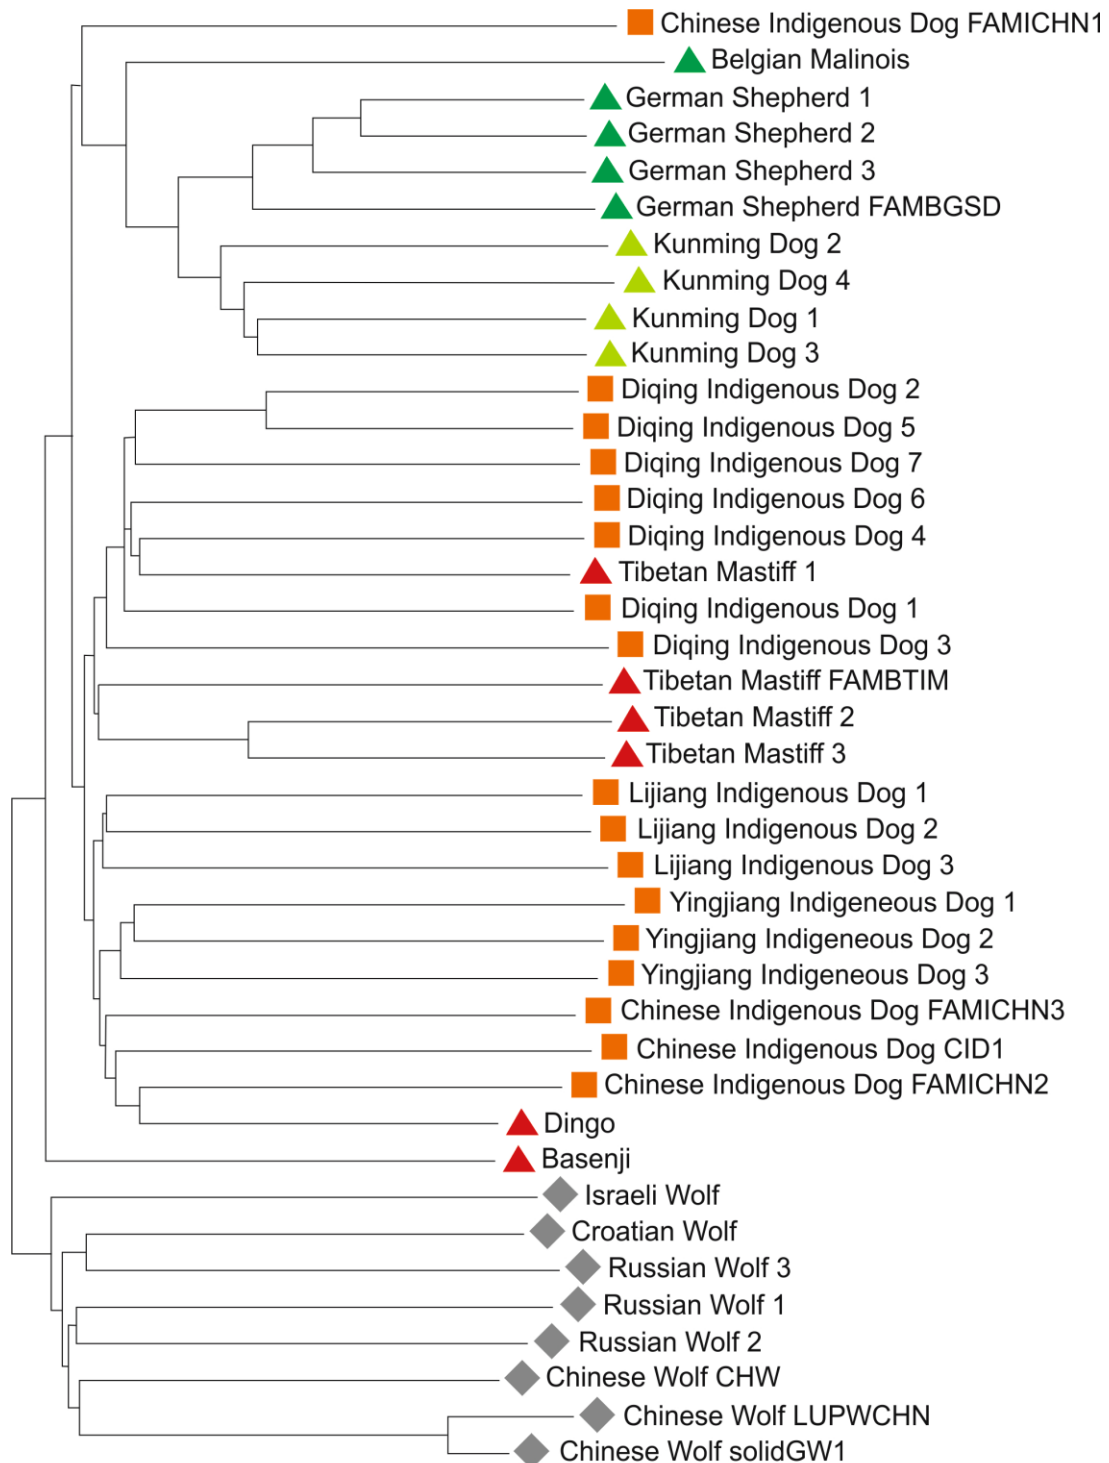

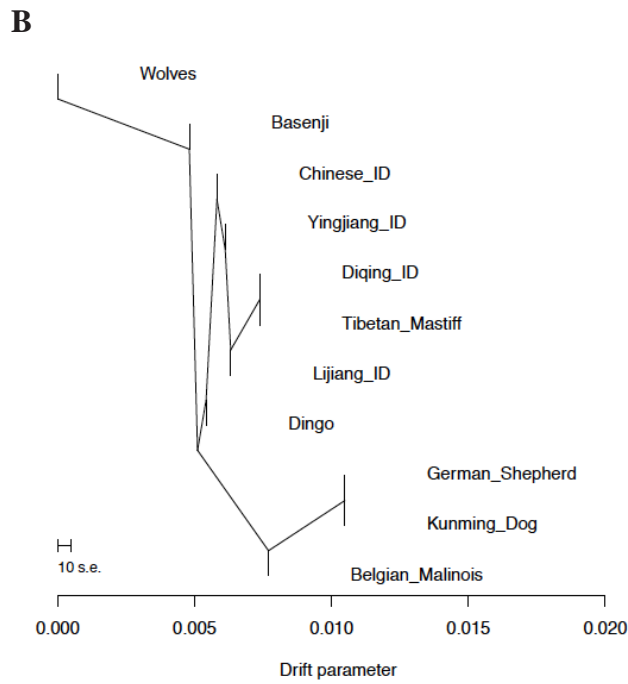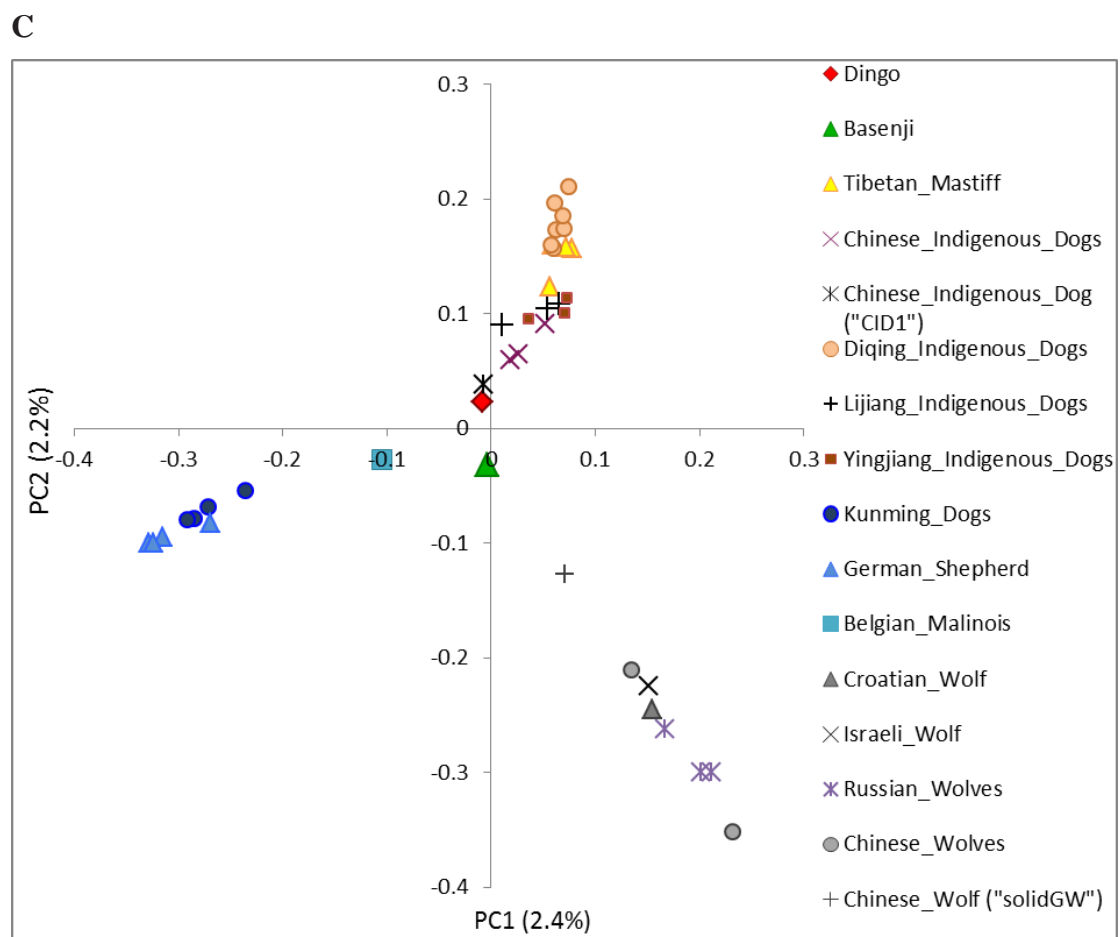

**Supplementary Figure 20. Evolutionary relationships between indigenous Chinese dogs, pure-breed dogs of modern and ancient origin, and grey wolves from the DoGSD database (Bai *et al.* 2015). (A) Neighbour-joining tree of inter-individual IBS distances (B) Maximum likelihood TREEMIX tree constructed without assuming gene flow; (C) PCA plot.**

**Supplementary Table 1.** List of dog breeds with basal position in the dog phylogeny according to four different studies (modified from Larson *et al.* 2012). Primary place of origin is provided if known from earlier studies, and different than present origin.

| Breed                                      | Parker<br><i>et al.</i><br>2004 | vonHoldt<br><i>et al.</i><br>2010 | Larson<br><i>et al.</i><br>2012 | Present<br>study | Origin | Primary<br>origin | Functional<br>group |
|--------------------------------------------|---------------------------------|-----------------------------------|---------------------------------|------------------|--------|-------------------|---------------------|
| Chow Chow                                  | y                               | y                                 |                                 |                  | EA     |                   | spitz               |
| Shar-Pei                                   | y                               | y                                 | y                               | y                | EA     |                   | spitz               |
| Shiba Inu                                  | y                               |                                   |                                 | y                | EA     |                   | spitz               |
| Akita                                      | y                               | y                                 | y                               | y                | EA     |                   | spitz               |
| Alaskan Malamute                           | y                               | y                                 |                                 | y                | AR     | EA <sup>1</sup>   | spitz               |
| American Eskimo<br>Greenland Sledge<br>Dog |                                 | amb                               |                                 |                  | AR     | EA <sup>1</sup>   | spitz               |
| Siberian Husky                             | y                               | y                                 |                                 | y                | EA(AR) |                   | spitz               |
| Samoyed                                    | amb                             | y                                 |                                 |                  | WA(AR) |                   | spitz               |
| Dingo<br>New Guinea                        |                                 | y                                 |                                 |                  | AU     | EA <sup>2</sup>   | wild dog            |
| Singing Dog                                |                                 | y                                 |                                 |                  | NG     | EA <sup>2</sup>   | wild dog            |
| Afghan Hound                               | y                               | y                                 |                                 |                  | C-WA   |                   | sighthound          |
| Saluki                                     | y                               | y                                 | y                               |                  | ME     |                   | sighthound          |
| Basenji                                    | y                               | y                                 | y                               |                  | AF     |                   | sighthound          |
| Tibetan Terrier<br>Canaan                  | amb                             |                                   | amb                             | amb              | EA     |                   | non-specified       |
| Eurasier                                   |                                 | y                                 |                                 |                  | ME     |                   | spitz               |
| Finnish Spitz                              |                                 |                                   | y                               | amb              | EU/EA  |                   | spitz               |
| Keeshond                                   | n                               |                                   |                                 | amb              | EU     |                   | spitz               |
| Schipperke                                 | n                               |                                   | amb                             | amb              | EU     |                   | spitz               |
| Elkhound                                   | n                               |                                   |                                 | amb              | EU     |                   | spitz               |
| German Spitz                               |                                 |                                   |                                 | amb              | EU     |                   | spitz               |

y – early-branching position, n – not early-branching position, amb – ambiguous

EA – East Asia, AR – Arctic, WA – West Asia, C-WA – Central/West Asia, ME – Middle East, EU – Europe, AF – Africa, AU – Australia, NG – New Guinea

<sup>1</sup> van Asch *et al.* 2013

<sup>2</sup> Oskarsson *et al.* 2012

**Supplementary Table 2. A list of FBDs used in this study and their sampling sites.**

| <b>ID</b> | <b>Sampling site</b> | <b>Sampling site name</b> | <b>Region</b>     |
|-----------|----------------------|---------------------------|-------------------|
| 23A       | Yerevan, Armenia     | Armenia                   | Central/West Asia |
| 24A       | Yerevan, Armenia     | Armenia                   | Central/West Asia |
| 25A       | Yerevan, Armenia     | Armenia                   | Central/West Asia |
| 26A       | Yerevan, Armenia     | Armenia                   | Central/West Asia |
| 27A       | Yerevan, Armenia     | Armenia                   | Central/West Asia |
| 28A       | Yerevan, Armenia     | Armenia                   | Central/West Asia |
| 29A       | Yerevan, Armenia     | Armenia                   | Central/West Asia |
| 30A       | Yerevan, Armenia     | Armenia                   | Central/West Asia |
| 31A       | Yerevan, Armenia     | Armenia                   | Central/West Asia |
| 32A       | Yerevan, Armenia     | Armenia                   | Central/West Asia |
| 33A       | Yerevan, Armenia     | Armenia                   | Central/West Asia |
| 34A       | Yerevan, Armenia     | Armenia                   | Central/West Asia |
| 35A       | Yerevan, Armenia     | Armenia                   | Central/West Asia |
| 36A       | Yerevan, Armenia     | Armenia                   | Central/West Asia |
| 37A       | Yerevan, Armenia     | Armenia                   | Central/West Asia |
| 38A       | Yerevan, Armenia     | Armenia                   | Central/West Asia |
| 39A       | Yerevan, Armenia     | Armenia                   | Central/West Asia |
| 40A       | Yerevan, Armenia     | Armenia                   | Central/West Asia |
| 41A       | Yerevan, Armenia     | Armenia                   | Central/West Asia |
| 42A       | Yerevan, Armenia     | Armenia                   | Central/West Asia |
| 43A       | Yerevan, Armenia     | Armenia                   | Central/West Asia |
| 44A       | Yerevan, Armenia     | Armenia                   | Central/West Asia |
| 45A       | Yerevan, Armenia     | Armenia                   | Central/West Asia |
| 46A       | Yerevan, Armenia     | Armenia                   | Central/West Asia |
| 47A       | Yerevan, Armenia     | Armenia                   | Central/West Asia |
| 89R       | Tomsk, Russia        | Central Russia            | Central/West Asia |
| 91R       | Tomsk, Russia        | Central Russia            | Central/West Asia |
| 92R       | Tomsk, Russia        | Central Russia            | Central/West Asia |
| 93R       | Tomsk, Russia        | Central Russia            | Central/West Asia |
| 94R       | Tomsk, Russia        | Central Russia            | Central/West Asia |
| 95R       | Tomsk, Russia        | Central Russia            | Central/West Asia |
| 96R       | Tomsk, Russia        | Central Russia            | Central/West Asia |

|      |                      |                |                   |
|------|----------------------|----------------|-------------------|
| 97R  | Tomsk, Russia        | Central Russia | Central/West Asia |
| 98R  | Tomsk, Russia        | Central Russia | Central/West Asia |
| 99R  | Tomsk, Russia        | Central Russia | Central/West Asia |
| 100R | Tomsk, Russia        | Central Russia | Central/West Asia |
| 102R | Tomsk, Russia        | Central Russia | Central/West Asia |
| 104R | Tomsk, Russia        | Central Russia | Central/West Asia |
| 105R | Tomsk, Russia        | Central Russia | Central/West Asia |
| 106R | Tomsk, Russia        | Central Russia | Central/West Asia |
| 107R | Tomsk, Russia        | Central Russia | Central/West Asia |
| 1KZ  | Almaty, Kazakhstan   | Kazakhstan     | Central/West Asia |
| 2KZ  | Almaty, Kazakhstan   | Kazakhstan     | Central/West Asia |
| 3KZ  | Almaty, Kazakhstan   | Kazakhstan     | Central/West Asia |
| 4KZ  | Almaty, Kazakhstan   | Kazakhstan     | Central/West Asia |
| 5KZ  | Almaty, Kazakhstan   | Kazakhstan     | Central/West Asia |
| 6KZ  | Almaty, Kazakhstan   | Kazakhstan     | Central/West Asia |
| 7KZ  | Almaty, Kazakhstan   | Kazakhstan     | Central/West Asia |
| 8KZ  | Almaty, Kazakhstan   | Kazakhstan     | Central/West Asia |
| 9KZ  | Almaty, Kazakhstan   | Kazakhstan     | Central/West Asia |
| 10KZ | Almaty, Kazakhstan   | Kazakhstan     | Central/West Asia |
| 11KZ | Almaty, Kazakhstan   | Kazakhstan     | Central/West Asia |
| 12KZ | Almaty, Kazakhstan   | Kazakhstan     | Central/West Asia |
| 13KZ | Almaty, Kazakhstan   | Kazakhstan     | Central/West Asia |
| 14KZ | Almaty, Kazakhstan   | Kazakhstan     | Central/West Asia |
| 15KZ | Almaty, Kazakhstan   | Kazakhstan     | Central/West Asia |
| 16KZ | Almaty, Kazakhstan   | Kazakhstan     | Central/West Asia |
| 17KZ | Almaty, Kazakhstan   | Kazakhstan     | Central/West Asia |
| 18KZ | Almaty, Kazakhstan   | Kazakhstan     | Central/West Asia |
| 19KZ | Almaty, Kazakhstan   | Kazakhstan     | Central/West Asia |
| 20KZ | Almaty, Kazakhstan   | Kazakhstan     | Central/West Asia |
| 1TDZ | Dushanbe, Tajikistan | Tajikistan     | Central/West Asia |
| 2TDZ | Dushanbe, Tajikistan | Tajikistan     | Central/West Asia |
| 3TDZ | Dushanbe, Tajikistan | Tajikistan     | Central/West Asia |
| 4TDZ | Dushanbe, Tajikistan | Tajikistan     | Central/West Asia |
| 5TDZ | Dushanbe, Tajikistan | Tajikistan     | Central/West Asia |
| 6TDZ | Dushanbe, Tajikistan | Tajikistan     | Central/West Asia |
| 7TDZ | Dushanbe, Tajikistan | Tajikistan     | Central/West Asia |

|       |                                |            |                   |
|-------|--------------------------------|------------|-------------------|
| 8TDZ  | Dushanbe, Tajikistan           | Tajikistan | Central/West Asia |
| 9TDZ  | Dushanbe, Tajikistan           | Tajikistan | Central/West Asia |
| 10TDZ | Dushanbe, Tajikistan           | Tajikistan | Central/West Asia |
| 12TDZ | Dushanbe, Tajikistan           | Tajikistan | Central/West Asia |
| 13TDZ | Dushanbe, Tajikistan           | Tajikistan | Central/West Asia |
| 14TDZ | Dushanbe, Tajikistan           | Tajikistan | Central/West Asia |
| 15TDZ | Dushanbe, Tajikistan           | Tajikistan | Central/West Asia |
| 16TDZ | Dushanbe, Tajikistan           | Tajikistan | Central/West Asia |
| 17TDZ | Dushanbe, Tajikistan           | Tajikistan | Central/West Asia |
| 18TDZ | Dushanbe, Tajikistan           | Tajikistan | Central/West Asia |
| 19TDZ | Dushanbe, Tajikistan           | Tajikistan | Central/West Asia |
| 20TDZ | Dushanbe, Tajikistan           | Tajikistan | Central/West Asia |
| 2CH   | Zibo, Shandong Province, China | China      | East Asia         |
| 3CH   | Zibo, Shandong Province, China | China      | East Asia         |
| 4CH   | Zibo, Shandong Province, China | China      | East Asia         |
| 5CH   | Zibo, Shandong Province, China | China      | East Asia         |
| 6CH   | Zibo, Shandong Province, China | China      | East Asia         |
| 7CH   | Zibo, Shandong Province, China | China      | East Asia         |
| 8CH   | Zibo, Shandong Province, China | China      | East Asia         |
| 9CH   | Zibo, Shandong Province, China | China      | East Asia         |
| 10CH  | Zibo, Shandong Province, China | China      | East Asia         |
| 1MG   | Ulan Bator, Mongolia           | Mongolia   | East Asia         |
| 2MG   | Ulan Bator, Mongolia           | Mongolia   | East Asia         |
| 3MG   | Ulan Bator, Mongolia           | Mongolia   | East Asia         |
| 4MG   | Ulan Bator, Mongolia           | Mongolia   | East Asia         |
| 6MG   | Ulan Bator, Mongolia           | Mongolia   | East Asia         |
| 8MG   | Ulan Bator, Mongolia           | Mongolia   | East Asia         |
| 9MG   | Ulan Bator, Mongolia           | Mongolia   | East Asia         |
| 10MG  | Ulan Bator, Mongolia           | Mongolia   | East Asia         |
| 11MG  | Ulan Bator, Mongolia           | Mongolia   | East Asia         |
| 12MG  | Ulan Bator, Mongolia           | Mongolia   | East Asia         |
| 13MG  | Ulan Bator, Mongolia           | Mongolia   | East Asia         |
| 14MG  | Ulan Bator, Mongolia           | Mongolia   | East Asia         |
| 15MG  | Ulan Bator, Mongolia           | Mongolia   | East Asia         |
| 16MG  | Ulan Bator, Mongolia           | Mongolia   | East Asia         |
| 17MG  | Ulan Bator, Mongolia           | Mongolia   | East Asia         |

|       |                                            |             |             |
|-------|--------------------------------------------|-------------|-------------|
| 18MG  | Ulan Bator, Mongolia                       | Mongolia    | East Asia   |
| 20MG  | Ulan Bator, Mongolia                       | Mongolia    | East Asia   |
| 21MG  | Ulan Bator, Mongolia                       | Mongolia    | East Asia   |
| 22MG  | Ulan Bator, Mongolia                       | Mongolia    | East Asia   |
| 23MG  | Ulan Bator, Mongolia                       | Mongolia    | East Asia   |
| 25MG  | Ulan Bator, Mongolia                       | Mongolia    | East Asia   |
| 26MG  | Ulan Bator, Mongolia                       | Mongolia    | East Asia   |
| 27MG  | Ulan Bator, Mongolia                       | Mongolia    | East Asia   |
| 28MG  | Ulan Bator, Mongolia                       | Mongolia    | East Asia   |
| 29MG  | Ulan Bator, Mongolia                       | Mongolia    | East Asia   |
| 30MG  | Ulan Bator, Mongolia                       | Mongolia    | East Asia   |
| 31MG  | Ulan Bator, Mongolia                       | Mongolia    | East Asia   |
| 1TAJ  | Mueang Khon Kaen District, Thailand        | Thailand    | East Asia   |
| 2TAJ  | Mueang Khon Kaen District, Thailand        | Thailand    | East Asia   |
| 3TAJ  | Mueang Khon Kaen District, Thailand        | Thailand    | East Asia   |
| 4TAJ  | Mueang Khon Kaen District, Thailand        | Thailand    | East Asia   |
| 5TAJ  | Mueang Khon Kaen District, Thailand        | Thailand    | East Asia   |
| 6TAJ  | Mueang Khon Kaen District, Thailand        | Thailand    | East Asia   |
| 7TAJ  | Mueang Khon Kaen District, Thailand        | Thailand    | East Asia   |
| 8TAJ  | Mueang Khon Kaen District, Thailand        | Thailand    | East Asia   |
| 10TAJ | Mueang Khon Kaen District, Thailand        | Thailand    | East Asia   |
| 11TAJ | Mueang Khon Kaen District, Thailand        | Thailand    | East Asia   |
| 12TAJ | Mueang Khon Kaen District, Thailand        | Thailand    | East Asia   |
| 13TAJ | Mueang Maha Sarakham District,<br>Thailand | Thailand    | East Asia   |
| 14TAJ | Mueang Maha Sarakham District,<br>Thailand | Thailand    | East Asia   |
| 16TAJ | Mueang Maha Sarakham District,<br>Thailand | Thailand    | East Asia   |
| 17TAJ | Mueang Maha Sarakham District,<br>Thailand | Thailand    | East Asia   |
| 18TAJ | Mueang Maha Sarakham District,<br>Thailand | Thailand    | East Asia   |
| 19TAJ | Mueang Maha Sarakham District,<br>Thailand | Thailand    | East Asia   |
| 21TAJ | Mueang Maha Sarakham District,<br>Thailand | Thailand    | East Asia   |
| 22TAJ | Mueang Maha Sarakham District,<br>Thailand | Thailand    | East Asia   |
| 23TAJ | Mueang Maha Sarakham District,<br>Thailand | Thailand    | East Asia   |
| 24TAJ | Mueang Maha Sarakham District,<br>Thailand | Thailand    | East Asia   |
| 108R  | Ussuriysk, Primorsky Krai, Russia          | East Russia | East Russia |



|      |                                   |             |             |
|------|-----------------------------------|-------------|-------------|
| 109R | Ussuriysk, Primorsky Krai, Russia | East Russia | East Russia |
| 110R | Ussuriysk, Primorsky Krai, Russia | East Russia | East Russia |
| 111R | Ussuriysk, Primorsky Krai, Russia | East Russia | East Russia |
| 112R | Ussuriysk, Primorsky Krai, Russia | East Russia | East Russia |
| 113R | Ussuriysk, Primorsky Krai, Russia | East Russia | East Russia |
| 114R | Ussuriysk, Primorsky Krai, Russia | East Russia | East Russia |
| 116R | Ussuriysk, Primorsky Krai, Russia | East Russia | East Russia |
| 118R | Ussuriysk, Primorsky Krai, Russia | East Russia | East Russia |
| 119R | Ussuriysk, Primorsky Krai, Russia | East Russia | East Russia |
| 120R | Ussuriysk, Primorsky Krai, Russia | East Russia | East Russia |
| 121R | Ussuriysk, Primorsky Krai, Russia | East Russia | East Russia |
| 122R | Ussuriysk, Primorsky Krai, Russia | East Russia | East Russia |
| 123R | Ussuriysk, Primorsky Krai, Russia | East Russia | East Russia |
| 124R | Ussuriysk, Primorsky Krai, Russia | East Russia | East Russia |
| 126R | Ussuriysk, Primorsky Krai, Russia | East Russia | East Russia |
| 125R | Ussuriysk, Primorsky Krai, Russia | East Russia | East Russia |
| 127R | Ussuriysk, Primorsky Krai, Russia | East Russia | East Russia |
| 128R | Ussuriysk, Primorsky Krai, Russia | East Russia | East Russia |
| 2BL  | Bulgaria                          | Bulgaria    | Europe      |
| 3BL  | Bulgaria                          | Bulgaria    | Europe      |
| 4BL  | Bulgaria                          | Bulgaria    | Europe      |
| 6BL  | Bulgaria                          | Bulgaria    | Europe      |
| 8BL  | Bulgaria                          | Bulgaria    | Europe      |
| 9BL  | Bulgaria                          | Bulgaria    | Europe      |
| 10BL | Bulgaria                          | Bulgaria    | Europe      |
| 11BL | Bulgaria                          | Bulgaria    | Europe      |
| 12BL | Bulgaria                          | Bulgaria    | Europe      |
| 1PL  | Zduny, Poland                     | Poland      | Europe      |
| 2PL  | Zduny, Poland                     | Poland      | Europe      |
| 3PL  | Zduny, Poland                     | Poland      | Europe      |
| 4PL  | Zduny, Poland                     | Poland      | Europe      |
| 5PL  | Zduny, Poland                     | Poland      | Europe      |
| 6PL  | Zduny, Poland                     | Poland      | Europe      |
| 7PL  | Zduny, Poland                     | Poland      | Europe      |
| 8PL  | Zduny, Poland                     | Poland      | Europe      |
| 9PL  | Zduny, Poland                     | Poland      | Europe      |

|      |                      |                |             |
|------|----------------------|----------------|-------------|
| 10PL | Zduny, Poland        | Poland         | Europe      |
| 13PL | Zduny, Poland        | Poland         | Europe      |
| 14PL | Zduny, Poland        | Poland         | Europe      |
| 15PL | Zduny, Poland        | Poland         | Europe      |
| 16PL | Zduny, Poland        | Poland         | Europe      |
| 17PL | Zduny, Poland        | Poland         | Europe      |
| 18PL | Zduny, Poland        | Poland         | Europe      |
| 19PL | Zduny, Poland        | Poland         | Europe      |
| 20PL | Zduny, Poland        | Poland         | Europe      |
| 21PL | Zduny, Poland        | Poland         | Europe      |
| 11PL | Zduny, Poland        | Poland         | Europe      |
| 12PL | Zduny, Poland        | Poland         | Europe      |
| 2SL  | Skofije, Slovenia    | Slovenia       | Europe      |
| 3SL  | Portoroz, Slovenia   | Slovenia       | Europe      |
| 4SL  | Ankaran, Slovenia    | Slovenia       | Europe      |
| 5SL  | Koper, Slovenia      | Slovenia       | Europe      |
| 6SL  | Koper, Slovenia      | Slovenia       | Europe      |
| 7SL  | Portoroz, Slovenia   | Slovenia       | Europe      |
| 8SL  | Skofije, Slovenia    | Slovenia       | Europe      |
| 9SL  | Skofije, Slovenia    | Slovenia       | Europe      |
| 10SL | Hrvaška, Slovenia    | Slovenia       | Europe      |
| 11SL | Koper, Slovenia      | Slovenia       | Europe      |
| 12SL | Koper, Slovenia      | Slovenia       | Europe      |
| 13SL | Ankaran, Slovenia    | Slovenia       | Europe      |
| 14SL | Piran, Slovenia      | Slovenia       | Europe      |
| 1p   | Basrah, Iraq         | Iraq           | Middle East |
| 2p   | Basrah, Iraq         | Iraq           | Middle East |
| 3p   | Basrah, Iraq         | Iraq           | Middle East |
| 4p   | Basrah, Iraq         | Iraq           | Middle East |
| 5p   | Basrah, Iraq         | Iraq           | Middle East |
| 6p   | Basrah, Iraq         | Iraq           | Middle East |
| 7p   | Basrah, Iraq         | Iraq           | Middle East |
| 8p   | Basrah, Iraq         | Iraq           | Middle East |
| 2AS  | Riyadh, Saudi Arabia | Saudi Arabia 1 | Middle East |
| 10AS | Riyadh, Saudi Arabia | Saudi Arabia 1 | Middle East |
| 11AS | Riyadh, Saudi Arabia | Saudi Arabia 1 | Middle East |

|      |                       |                |             |
|------|-----------------------|----------------|-------------|
| 13AS | Riyadh, Saudi Arabia  | Saudi Arabia 1 | Middle East |
| 14AS | Riyadh, Saudi Arabia  | Saudi Arabia 1 | Middle East |
| 15AS | Riyadh, Saudi Arabia  | Saudi Arabia 1 | Middle East |
| 16AS | Riyadh, Saudi Arabia  | Saudi Arabia 1 | Middle East |
| 17AS | Riyadh, Saudi Arabia  | Saudi Arabia 1 | Middle East |
| 18AS | Riyadh, Saudi Arabia  | Saudi Arabia 1 | Middle East |
| 19AS | Riyadh, Saudi Arabia  | Saudi Arabia 1 | Middle East |
| 20AS | Riyadh, Saudi Arabia  | Saudi Arabia 1 | Middle East |
| 21AS | Riyadh, Saudi Arabia  | Saudi Arabia 1 | Middle East |
| 24AS | Riyadh, Saudi Arabia  | Saudi Arabia 1 | Middle East |
| 25AS | Riyadh, Saudi Arabia  | Saudi Arabia 1 | Middle East |
| 27AS | Riyadh, Saudi Arabia  | Saudi Arabia 1 | Middle East |
| 28AS | Riyadh, Saudi Arabia  | Saudi Arabia 1 | Middle East |
| 29AS | Riyadh, Saudi Arabia  | Saudi Arabia 1 | Middle East |
| 30AS | Riyadh, Saudi Arabia  | Saudi Arabia 1 | Middle East |
| 31AS | Riyadh, Saudi Arabia  | Saudi Arabia 1 | Middle East |
| 32AS | Riyadh, Saudi Arabia  | Saudi Arabia 1 | Middle East |
| 22AS | Riyadh, Saudi Arabia  | Saudi Arabia 1 | Middle East |
| 26AS | Riyadh, Saudi Arabia  | Saudi Arabia 1 | Middle East |
| 36AS | Al-Baha, Saudi Arabia | Saudi Arabia 2 | Middle East |
| 37AS | Al-Baha, Saudi Arabia | Saudi Arabia 2 | Middle East |
| 38AS | Al-Baha, Saudi Arabia | Saudi Arabia 2 | Middle East |
| 40AS | Al-Baha, Saudi Arabia | Saudi Arabia 2 | Middle East |
| 41AS | Al-Baha, Saudi Arabia | Saudi Arabia 2 | Middle East |

---

**Supplementary Table 3. A list of dog breeds used in this study, and their regions of origin.** "UK" dataset was produced in the present study, and consisted of dogs sampled in the United Kingdom. "LUPA" is a published, publicly available dataset deriving from Vaysse *et al.* (2011). Columns N(LUPA) and N(UK) provide the number of representatives of each breed present in these two datasets.

| Breed                               | N(LUPA) | N(UK) | Breed origin                     |
|-------------------------------------|---------|-------|----------------------------------|
| Australian Kelpie                   |         | 2     | Australia, ultimately Europe     |
| Bearded Collie                      |         | 3     | Europe                           |
| Border Collie                       | 16      | 8     | Europe                           |
| Rough Collie                        |         | 2     | Europe                           |
| Shetland Sheepdog                   |         | 2     | Europe                           |
| Beagle                              | 10      | 1     | Europe                           |
| Dachshund                           | 12      |       | Europe                           |
| Belgian Tervuren                    | 12      |       | Europe                           |
| German Shepherd Dog                 | 12      | 9     | Europe                           |
| Doberman                            | 25      |       | Europe                           |
| Malinois                            |         | 1     | Europe                           |
| Bernese Mountain Dog                | 12      |       | Europe                           |
| Dalmatian                           |         | 2     | Europe                           |
| Rottweiler                          | 12      | 8     | Europe                           |
| Weimaraner                          | 26      |       | Europe                           |
| Vizsla                              |         | 4     | Europe                           |
| Border Terrier                      | 25      |       | Europe                           |
| Cairn Terrier                       |         | 2     | Europe                           |
| Jack Russell Terrier                | 12      | 4     | Europe                           |
| Lakeland Terrier                    |         | 2     | Europe                           |
| Parson Terrier                      |         | 2     | Europe                           |
| Wheaten Terrier                     |         | 2     | Europe                           |
| Yorkshire Terrier                   | 12      |       | Europe                           |
| English Bulldog                     | 13      |       | Europe                           |
| Staffordshire Bullterrier           |         | 4     | Europe                           |
| Brittany Spaniel                    | 12      |       | Europe                           |
| Cocker Spaniel                      | 14      | 2     | Europe                           |
| Springer Spaniel                    |         | 1     | Europe                           |
| English Setter                      | 12      |       | Europe                           |
| Gordon Setter                       | 25      |       | Europe                           |
| Golden Retriever                    | 14      | 4     | Europe                           |
| Flatcoated Retriever                |         | 1     | North America, ultimately Europe |
| Labrador Retriever                  | 14      | 2     | North America, ultimately Europe |
| Newfoundland Retriever              | 25      |       | North America, ultimately Europe |
| Nova Scottia Duck-Tolling Retriever | 23      |       | North America, ultimately Europe |
| Toy Poodle                          |         | 1     | Europe                           |
| Miniature Poodle                    |         | 1     | Europe                           |
| Standard Poodle                     | 12      |       | Europe                           |
| Greyhound                           | 11      | 6     | Europe                           |

|                      |    |   |                                     |
|----------------------|----|---|-------------------------------------|
| Elkhound             | 12 |   | Europe                              |
| Irish Wolfhound      | 11 |   | Europe                              |
| Keeshond             |    | 2 | Europe                              |
| Schipperke           | 25 |   | Europe                              |
| German Spitz         |    | 2 | Europe                              |
| Finnish Spitz        | 12 |   | Europe                              |
| Eurasier             | 12 |   | mixed Europe and East Asia          |
| Tibetan Terrier      |    | 2 | East Asia                           |
| Shar Pei             | 11 |   | East Asia                           |
| Shiba Inu            |    | 2 | East Asia                           |
| Siberian Husky       |    | 2 | East Asia (east Siberia)            |
| Alaskan Malamute     |    | 2 | North America, ultimately East Asia |
| Greenland Sledge Dog | 12 |   | Greenland, ultimately East Asia     |

---

**Supplementary Table 4.** Genetic diversity at genome-wide autosomal SNPs in FBDs populations in Eurasia.  $H_O$  – observed heterozygosity,  $H_E$  – expected heterozygosity,  $N$  – number of individuals used to calculate the diversity indices. Intra-population divergence was calculated using EIGENSOFT software. The table is sorted according to  $H_O$  values.

| Location       | Region      | N | $H_O$  | $H_E$  | Intra-population divergence |
|----------------|-------------|---|--------|--------|-----------------------------|
| Armenia        | C/W Asia    | 9 | 0.3538 | 0.3341 | 1.061                       |
| Kazakhstan     | C/W Asia    | 9 | 0.3502 | 0.3312 | 0.994                       |
| Mongolia       | E Asia      | 9 | 0.3484 | 0.3293 | 0.973                       |
| Bulgaria       | Europe      | 9 | 0.3447 | 0.3268 | 0.964                       |
| Tajikistan     | C/W Asia    | 9 | 0.3441 | 0.3288 | 1.005                       |
| China          | E Asia      | 9 | 0.3427 | 0.3239 | 0.972                       |
| Poland         | Europe      | 9 | 0.3415 | 0.3295 | 1.024                       |
| Iraq           | Middle East | 4 | 0.3383 | 0.2967 | 0.946                       |
| Central Russia | C/W Asia    | 9 | 0.3336 | 0.3287 | 1.023                       |
| Thailand       | E Asia      | 9 | 0.3336 | 0.3264 | 1.058                       |
| East Russia    | NE Asia     | 9 | 0.3266 | 0.3275 | 1.040                       |
| Slovenia       | Europe      | 9 | 0.3254 | 0.3285 | 1.029                       |
| Saudi Arabia 1 | Middle East | 9 | 0.3021 | 0.3070 | 0.986                       |
| Saudi Arabia 2 | Middle East | 5 | 0.2973 | 0.2783 | 0.924                       |

**Supplementary Table 5. Autozygosity in FBD populations in Eurasia.**

Autozygosity is measured as number of homozygous segments (ROHs) of different length identified in individuals from each population.

| Location    | Region | Total number of ROHs | Number of ROHs <1Mb | Freq. of ROHs <1Mb | Number of ROHs 1-2Mb | Freq. of ROHs 1-2Mb | Number of ROHs >2Mb | Freq. of ROHs >2Mb | Largest ROH length (Mb) |
|-------------|--------|----------------------|---------------------|--------------------|----------------------|---------------------|---------------------|--------------------|-------------------------|
| Iraq        | ME     | 59                   | 10                  | 0.17               | 15                   | 0.25                | 34                  | 0.58               | 19                      |
| China       | EA     | 70                   | 19                  | 0.27               | 35                   | 0.50                | 16                  | 0.23               | 9                       |
| Armenia     | C-WA   | 100                  | 23                  | 0.23               | 44                   | 0.44                | 33                  | 0.33               | 31                      |
| Kazakhstan  | C-WA   | 111                  | 13                  | 0.12               | 62                   | 0.56                | 36                  | 0.32               | 26                      |
| S. Arabia 2 | ME     | 116                  | 15                  | 0.13               | 37                   | 0.32                | 64                  | 0.55               | 53                      |
| Mongolia    | EA     | 118                  | 21                  | 0.18               | 46                   | 0.39                | 51                  | 0.43               | 12                      |
| Bulgaria    | EU     | 136                  | 26                  | 0.19               | 49                   | 0.36                | 61                  | 0.45               | 24                      |
| Thailand    | EA     | 163                  | 26                  | 0.16               | 64                   | 0.39                | 73                  | 0.45               | 54                      |
| Tajikistan  | C-WA   | 166                  | 26                  | 0.16               | 71                   | 0.43                | 69                  | 0.42               | 41                      |
| Poland      | EU     | 173                  | 37                  | 0.21               | 74                   | 0.43                | 62                  | 0.36               | 61                      |
| Central     |        |                      |                     |                    |                      |                     |                     |                    |                         |
| Russia      | C-WA   | 191                  | 33                  | 0.17               | 51                   | 0.27                | 107                 | 0.56               | 73                      |
| Slovenia    | EU     | 241                  | 39                  | 0.16               | 88                   | 0.37                | 114                 | 0.47               | 53                      |
| S. Arabia 1 | ME     | 320                  | 25                  | 0.08               | 98                   | 0.31                | 197                 | 0.62               | 52                      |
| East Russia | EA     | 333                  | 43                  | 0.13               | 110                  | 0.33                | 180                 | 0.54               | 88                      |

EA – East Asia, C-WA – Central/West Asia, ME – Middle East, EU – Europe
